# Supplementary material for: Rh(iii)-Catalysed cascade C–H imidization/cyclization ofN-methoxybenzamides with isoxazolones for the assembly of dihydroquinazolin-4(1H)-one derivatives
Source: Royal Society of Chemistry journal article supplement (doi:10.1039/d1qo01935j), 2022-01-01

## *Supplementary Information*

# **Rh(III)-Catalysed Cascade C-H Imidization/Cyclization of N-Methoxybenzamides with Isoxazolones for the Assembly of Dihydroquinazolin-4(1H)-one Derivatives**

Xiuhua Zhong,<sup>+</sup> Shuang Lin,<sup>+</sup> Huiying Xu, Xin Zhao, Hui Gao, Wei Yi\* and Zhi Zhou\*

Key Laboratory of Molecular Target & Clinical Pharmacology and State Key Laboratory of Respiratory Disease, School of Pharmaceutical Sciences and the Fifth Affiliated Hospital, Guangzhou Medical University, Guangzhou, Guangdong 511436, P. R. China

<sup>+</sup>These authors contributed equally.

\*E-mail: yiwei@gzhmu.edu.cn and zhouzhi@gzhmu.edu.cn

## **Contents**

|      |                                                                                |     |
|------|--------------------------------------------------------------------------------|-----|
| I.   | General.....                                                                   | S2  |
| II.  | Experimental Information and Characterization Data.....                        | S2  |
| III. | Experimental Mechanistic Studies.....                                          | S18 |
| IV.  | DFT Calculations.....                                                          | S23 |
| V.   | References.....                                                                | S71 |
| VI.  | Copies of <sup>1</sup> H, <sup>13</sup> C and <sup>19</sup> F NMR Spectra..... | S72 |

## I. General

NMR spectra were recorded on JEOL 400 NMR ( $^1\text{H}$  400 MHz;  $^{13}\text{C}$  100 MHz) in either  $\text{CDCl}_3$ ,  $\text{CD}_3\text{OD}$  or  $\text{DMSO-}d_6$ . Abbreviations for data quoted are s, singlet; brs, broad singlet; d, doublet; t, triplet; dd, doublet of doublets; m, multiplet. The residual solvent signals were used as references and the chemical shifts converted to the TMS scale ( $\text{CDCl}_3$ :  $\delta_{\text{H}} = 7.26$  ppm,  $\delta_{\text{C}} = 77.16$  ppm;  $\text{CD}_3\text{OD}$ :  $\delta_{\text{H}} = 3.31$  ppm,  $\delta_{\text{C}} = 49.00$  ppm;  $d_6$ -DMSO:  $\delta_{\text{H}} = 2.50$  ppm,  $\delta_{\text{C}} = 39.52$  ppm). Mass spectra and high-resolution mass spectra were measured on an agilent TOF-G6230B mass spectrometer and Thermo-DFS mass spectrometer. Thin-layer chromatographies were done on pre-coated silica gel 60 F254 plates (Merck). Silica gel 60H (200-300 mesh) and preparative TLC (200x200 mm, 0.2-0.25 mm in thickness) manufactured by Qingdao Haiyang Chemical Group Co. (China) were used for general chromatography.  $[\text{Cp}^*\text{IrCl}_2]_2$ ,  $[\text{Cp}^*\text{RhCl}_2]_2$ ,  $[\text{Ru}(p\text{-cymene})\text{Cl}_2]_2$  and CsOAc were purchased from Aldrich and used without further purification. *N*-methoxybenzamides<sup>S1</sup> and isoxazolones<sup>S2</sup> were synthesized according to published procedures. Other chemicals were purchased from commercial suppliers and were dried and purified when necessary. No attempts were made to optimize yields for substrate synthesis.

## II. Experimental Information and Characterization Data

### Optimization studies:

The mixture of *N*-methoxybenzamide **1a** (0.2 mmol, 1.0 equiv), 3-methylisoxazol-5(4*H*)-one **2a**, catalyst (x mol %), base (1 equiv) and additives in the solvent was stirred at 100 °C in an oil bath for 24 h without exclusion of air or moisture. Afterwards, it was diluted with EtOAc and filtered through a short silica gel column to remove the metal residues. Then, the reaction mixture was concentrated and purified by preparative TLC (eluent: PE/EA = 2/1) to afford the corresponding product **3aa**.

**Table S1.** Conditions Screening for the Synthesis of **3aa**.<sup>a</sup>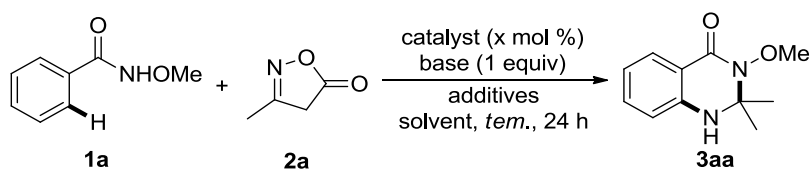

| Entry           | Catalyst<br>(x mol %)                                                       | Base                            | Additive<br>(y equiv)              | Solvent            | Yield<br>(%) <sup>b</sup> |
|-----------------|-----------------------------------------------------------------------------|---------------------------------|------------------------------------|--------------------|---------------------------|
| 1               | [Cp*RhCl <sub>2</sub> ] <sub>2</sub> (2.5)                                  | NaOAc                           | -                                  | MeOH               | 23                        |
| 2               | [Cp*RhCl <sub>2</sub> ] <sub>2</sub> (2.5)                                  | NaOAc                           | -                                  | THF                | n.d.                      |
| 3               | [Cp*RhCl <sub>2</sub> ] <sub>2</sub> (2.5)                                  | NaOAc                           | -                                  | TFE                | 29                        |
| 4               | [Cp*RhCl <sub>2</sub> ] <sub>2</sub> (2.5)                                  | NaOAc                           | -                                  | CH <sub>3</sub> CN | trace                     |
| 5               | [Cp*RhCl <sub>2</sub> ] <sub>2</sub> (2.5)                                  | NaOAc                           | -                                  | toluene            | trace                     |
| 6               | [Cp*RhCl <sub>2</sub> ] <sub>2</sub> (2.5)                                  | NaOAc                           | -                                  | dioxane            | n.d.                      |
| 7               | [Cp*RhCl <sub>2</sub> ] <sub>2</sub> (2.5)                                  | NaOAc                           | -                                  | DCE                | trace                     |
| 8               | [Cp*RhCl <sub>2</sub> ] <sub>2</sub> (2.5)                                  | NaOAc                           | -                                  | HFIP               | 21                        |
| 9               | [Cp*RhCl <sub>2</sub> ] <sub>2</sub> (2.5)                                  | CsOAc                           | -                                  | TFE                | 38                        |
| 10              | [Cp*RhCl <sub>2</sub> ] <sub>2</sub> (2.5)                                  | K <sub>2</sub> CO <sub>3</sub>  | -                                  | TFE                | 18                        |
| 11              | [Cp*RhCl <sub>2</sub> ] <sub>2</sub> (2.5)                                  | KOPiv                           | -                                  | TFE                | 48                        |
| 12              | [Cp*RhCl <sub>2</sub> ] <sub>2</sub> (2.5)                                  | AgOAc                           | -                                  | TFE                | 11                        |
| 13              | [Cp*RhCl <sub>2</sub> ] <sub>2</sub> (2.5)                                  | Cs <sub>2</sub> CO <sub>3</sub> | -                                  | TFE                | 9                         |
| 14              | [Cp*RhCl <sub>2</sub> ] <sub>2</sub> (2.5)                                  | K <sub>3</sub> PO <sub>4</sub>  | -                                  | TFE                | 15                        |
| 15              | [Cp*RhCl <sub>2</sub> ] <sub>2</sub> (2.5)                                  | KOPiv                           | HOAc (2)                           | TFE                | 65                        |
| 16              | [Cp*RhCl <sub>2</sub> ] <sub>2</sub> (2.5)                                  | KOPiv                           | PivOH (2)                          | TFE                | 57                        |
| 17              | [Cp*RhCl <sub>2</sub> ] <sub>2</sub> (2.5)                                  | KOPiv                           | H <sub>2</sub> O (2)               | TFE                | 39                        |
| 18              | [Cp*RhCl <sub>2</sub> ] <sub>2</sub> (2.5)                                  | KOPiv                           | Zn(OAc) <sub>2</sub> (2)           | TFE                | 56                        |
| 19              | [Cp*RhCl <sub>2</sub> ] <sub>2</sub> (2.5)                                  | KOPiv                           | Cu(OAc) <sub>2</sub> (2)           | TFE                | n.d.                      |
| 20              | [Cp*RhCl <sub>2</sub> ] <sub>2</sub> (2.5)                                  | KOPiv                           | ZnCl <sub>2</sub> (2)              | TFE                | n.d.                      |
| 21              | [Cp*RhCl <sub>2</sub> ] <sub>2</sub> (2.5)                                  | KOPiv                           | AgF (2)                            | TFE                | n.d.                      |
| 22              | [Cp*RhCl <sub>2</sub> ] <sub>2</sub> (2.5)                                  | KOPiv                           | TfOH (2)                           | TFE                | n.d.                      |
| 23              | [Cp*RhCl <sub>2</sub> ] <sub>2</sub> (2.5)                                  | KOPiv                           | TsOH (2)                           | TFE                | n.d.                      |
| 24              | [Cp*IrCl <sub>2</sub> ] <sub>2</sub> (2.5)                                  | KOPiv                           | HOAc (2)                           | TFE                | trace                     |
| 25              | [Ru( <i>p</i> -cymene)Cl <sub>2</sub> ] <sub>2</sub> (2.5)                  | KOPiv                           | HOAc (2)                           | TFE                | n.d.                      |
| 26              | Cp*Co(CO)I <sub>2</sub> (5)                                                 | KOPiv                           | HOAc (2)                           | TFE                | n.d.                      |
| 27              | Cp*Rh(CH <sub>3</sub> CN) <sub>2</sub> (SbF <sub>6</sub> ) <sub>2</sub> (5) | -                               | HOAc (2)                           | TFE                | n.d.                      |
| 28 <sup>c</sup> | [Cp*RhCl <sub>2</sub> ] <sub>2</sub> (2.5)                                  | KOPiv                           | HOAc (2)                           | TFE                | 70                        |
| 29              | [Cp*RhCl <sub>2</sub> ] <sub>2</sub> (5)                                    | KOPiv                           | HOAc (2)                           | TFE                | 86                        |
| 30 <sup>d</sup> | [Cp*RhCl <sub>2</sub> ] <sub>2</sub> (5)                                    | KOPiv                           | HOAc (2)                           | TFE                | 70                        |
| 31 <sup>e</sup> | [Cp*RhCl <sub>2</sub> ] <sub>2</sub> (5)                                    | KOPiv                           | HOAc (2)                           | TFE                | 66                        |
| 32 <sup>f</sup> | [Cp*RhCl <sub>2</sub> ] <sub>2</sub> (5)                                    | KOPiv                           | HOAc (2)                           | TFE                | 34                        |
| 33 <sup>g</sup> | [Cp*RhCl <sub>2</sub> ] <sub>2</sub> (5)                                    | KOPiv                           | HOAc (2)                           | TFE                | trace                     |
| 34              | [Cp*RhCl <sub>2</sub> ] <sub>2</sub> (5)                                    | KOPiv                           | HOAc (1)                           | TFE                | 76                        |
| 35              | [Cp*RhCl <sub>2</sub> ] <sub>2</sub> (5)                                    | KOPiv                           | K <sub>2</sub> CO <sub>3</sub> (1) | TFE                | 18                        |

<sup>a</sup>Reaction Conditions: **1a** (0.2 mmol), **2a** (0.2 mmol), catalyst (x mol %), base (1 equiv), and additive in the solvent (0.1 M) at 100 °C for 24 h under air. <sup>b</sup>Isolated yield. <sup>c</sup>**2a** (0.24 mmol). <sup>d</sup>TFE (0.2 M). <sup>e</sup>The reaction was conducted at 80 °C. <sup>f</sup>The reaction was conducted at 60 °C. <sup>g</sup>The reaction was conducted at 40 °C. TFE: 2,2,2-Trifluoroethanol; HFIP: 1,1,1,3,3,3-Hexafluoro-2-propanol; n,d.: not detected.

### General procedure for the synthesis of dihydroquinazolin-4(1H)-ones:

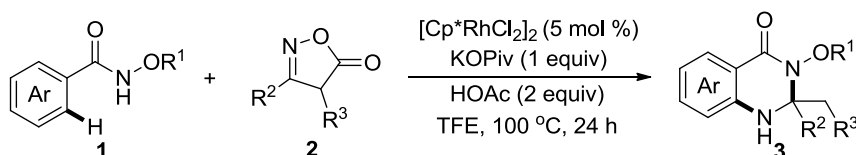

The mixture of *N*-methoxybenzamides **1** (0.2 mmol, 1.0 equiv), isoxazol-5(4*H*)-one **2** (0.24 mmol, 1.2 equiv), [Cp\*RhCl<sub>2</sub>]<sub>2</sub> (5 mol %), KOPiv (1 equiv) and HOAc (2 equiv) in TFE (2.0 mL) was stirred at 100 °C in an oil bath for 24 h without exclusion of air or moisture. Afterwards, it was diluted with EtOAc and filtered through a short silica gel column to remove the metal residues. Then, the reaction mixture was concentrated and purified by preparative TLC to afford the corresponding product **3**.

### Characterization of products:

#### 3-methoxy-2,2-dimethyl-2,3-dihydroquinazolin-4(1H)-one (**3aa**)

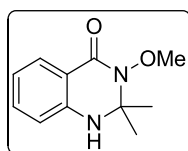

This compound was obtained in 86% yield (35.5 mg) as white solid, m.p.: 160-162 °C.

Eluent: PE/EA = 2/1, R<sub>f</sub> = 0.5.

<sup>1</sup>H NMR (400 MHz, DMSO-*d*<sub>6</sub>): δ 7.63 (d, *J* = 7.9 Hz, 1H), 7.30-7.23 (m, 1H), 7.08 (s, 1H), 6.70-6.66 (m, 2H), 3.75 (s, 3H), 1.45 (s, 6H).

<sup>13</sup>C NMR (100 MHz, DMSO-*d*<sub>6</sub>): δ 164.0, 145.9, 133.9, 127.3, 117.1, 114.4, 112.8, 75.7, 64.0, 24.5.

HRMS (ESI) calculated for C<sub>11</sub>H<sub>15</sub>N<sub>2</sub>O<sub>2</sub> ([M+H]<sup>+</sup>): 207.1128; found: 207.1126.

**Scale-up synthesis of 3aa:** The mixture of *N*-methoxybenzamides **1** (2 mmol, 1.0 equiv), isoxazol-5(4*H*)-one **2a** (2.4 mmol, 1.2 equiv), [Cp\*RhCl<sub>2</sub>]<sub>2</sub> (5 mol %), KOPiv

(1 equiv) and HOAc (2 equiv) in TFE (20.0 mL) was stirred at 100 °C in an oil bath for 24 h without exclusion of air or moisture. Afterwards, the mixture was diluted with EtOAc and filtered through a short silica gel column to remove the metal residues. Then, the reaction mixture was concentrated and purified by column chromatography (eluent: PE/EtOAc = 5/1) to afford the desired product **3aa** (0.329 g, 80%).

### 3-methoxy-2,2,7-trimethyl-2,3-dihydroquinazolin-4(1H)-one (**3ba**)

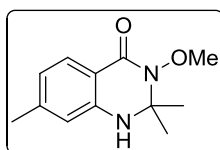

This compound was obtained in 81% yield (35.6 mg) as white solid, m.p.: 214-215 °C. Eluent: PE/EA = 2/1,  $R_f$  = 0.5.

**$^1\text{H}$  NMR (400 MHz,  $\text{CD}_3\text{OD}$ ):**  $\delta$  7.59 (d,  $J$  = 8.0 Hz, 1H), 6.57 (d,  $J$  = 8.0 Hz, 1H), 6.49 (s, 1H), 3.84 (s, 3H), 2.26 (s, 3H), 1.53 (s, 6H).

**$^{13}\text{C}$  NMR (100 MHz,  $\text{CD}_3\text{OD}$ ):**  $\delta$  167.4, 147.5, 146.7, 128.7, 120.3, 115.8, 111.8, 77.7, 65.3, 24.9, 21.8.

**HRMS (ESI)** calculated for  $\text{C}_{12}\text{H}_{17}\text{N}_2\text{O}_2$  ( $[\text{M}+\text{H}]^+$ ): 221.1285; found: 221.1283.

### 7-(*tert*-butyl)-3-methoxy-2,2-dimethyl-2,3-dihydroquinazolin-4(1H)-one (**3ca**)

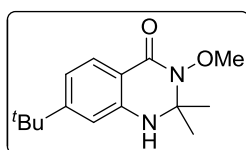

This compound was obtained in 82% yield (43.0 mg) as white solid, m.p.: 217-218 °C. Eluent: PE/EA = 3/1,  $R_f$  = 0.7

**$^1\text{H}$  NMR (400 MHz,  $\text{CD}_3\text{OD}$ ):**  $\delta$  7.63 (d,  $J$  = 8.4 Hz, 1H), 6.82 (dd,  $J$  = 8.4, 1.5 Hz, 1H), 6.70 (d,  $J$  = 1.4 Hz, 1H), 3.84 (s, 3H), 1.53 (s, 6H), 1.27 (s, 9H).

**$^{13}\text{C}$  NMR (100 MHz,  $\text{CD}_3\text{OD}$ ):**  $\delta$  167.4, 159.7, 147.4, 128.4, 116.9, 112.0, 111.6, 77.7, 65.3, 35.9, 31.4, 25.0.

**HRMS (ESI)** calculated for  $\text{C}_{15}\text{H}_{23}\text{N}_2\text{O}_2$  ( $[\text{M}+\text{H}]^+$ ): 263.1754; found: 263.1750.

### 7-ethyl-3-methoxy-2,2-dimethyl-2,3-dihydroquinazolin-4(1H)-one (3da)

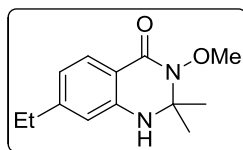

This compound was obtained in 78% yield (36.5 mg) as white solid, m.p.: 202-204 °C.

Eluent: PE/EA = 2/1,  $R_f$  = 0.6

**$^1\text{H}$  NMR (400 MHz,  $\text{CD}_3\text{OD}$ ):**  $\delta$  7.62 (d,  $J$  = 8.1 Hz, 1H), 6.60 (d,  $J$  = 8.1 Hz, 1H), 6.51 (s, 1H), 3.84 (s, 3H), 2.55 (q,  $J$  = 7.6 Hz, 2H), 1.53 (s, 6H), 1.20 (t,  $J$  = 7.6 Hz, 3H).

**$^{13}\text{C}$  NMR (100 MHz,  $\text{CD}_3\text{OD}$ ):**  $\delta$  167.4, 153.0, 147.6, 128.8, 119.2, 114.6, 112.0, 77.7, 65.3, 30.1, 24.9, 15.5.

**HRMS (ESI)** calculated for  $\text{C}_{13}\text{H}_{19}\text{N}_2\text{O}_2$  ( $[\text{M}+\text{H}]^+$ ): 235.1441; found: 237.1439.

### 3,7-dimethoxy-2,2-dimethyl-2,3-dihydroquinazolin-4(1H)-one (3ea)

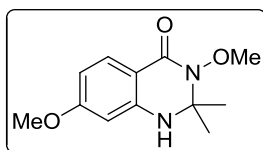

This compound was obtained in 78% yield (36.8 mg) as white solid, m.p.: 194-196 °C.

Eluent: PE/EA = 2/1,  $R_f$  = 0.6

**$^1\text{H}$  NMR (400 MHz,  $\text{CD}_3\text{OD}$ ):**  $\delta$  7.63 (d,  $J$  = 8.8 Hz, 1H), 6.33 (dd,  $J$  = 8.8, 2.2 Hz, 1H), 6.17 (d,  $J$  = 2.1 Hz, 1H), 3.84 (s, 3H), 3.78 (s, 3H), 1.53 (s, 6H).

**$^{13}\text{C}$  NMR (100 MHz,  $\text{CD}_3\text{OD}$ ):**  $\delta$  167.5, 166.6, 149.4, 130.6, 107.4, 107.1, 98.7, 77.6, 65.3, 55.8, 24.9.

**HRMS (ESI)** calculated for  $\text{C}_{12}\text{H}_{17}\text{N}_2\text{O}_3$  ( $[\text{M}+\text{H}]^+$ ): 237.1234; found: 237.1232.

### 7-fluoro-3-methoxy-2,2-dimethyl-2,3-dihydroquinazolin-4(1H)-one (3fa)

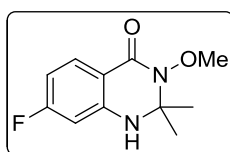

This compound was obtained in 70% yield (31.4 mg) as white solid, m.p.: 182-184 °C.

Eluent: PE/EA = 2/1,  $R_f = 0.6$

$^1\text{H NMR}$  (400 MHz,  $\text{CDCl}_3$ ):  $\delta$  7.89 (dd,  $J = 8.6, 6.4$  Hz, 1H), 6.51 (td,  $J = 8.6, 2.2$  Hz, 1H), 6.33 (dd,  $J = 10.0, 2.2$  Hz, 1H), 4.87 (brs, 1H), 3.90 (s, 3H), 1.60 (s, 6H).

$^{13}\text{C NMR}$  (100 MHz,  $\text{CDCl}_3$ ):  $\delta$  166.9 (d,  $J = 250.5$  Hz), 164.6, 146.6 (d,  $J = 12.4$  Hz), 131.2 (d,  $J = 11.3$  Hz), 110.8, 106.7 (d,  $J = 22.9$  Hz), 101.0 (d,  $J = 25.4$  Hz), 76.5, 64.9, 25.3.

$^{19}\text{F NMR}$  (376 MHz,  $\text{CDCl}_3$ ): -106.0.

HRMS (ESI) calculated for  $\text{C}_{11}\text{H}_{14}\text{FN}_2\text{O}_2$  ( $[\text{M}+\text{H}]^+$ ): 225.1034; found: 225.1032.

### 7-chloro-3-methoxy-2,2-dimethyl-2,3-dihydroquinazolin-4(1H)-one (3ga)

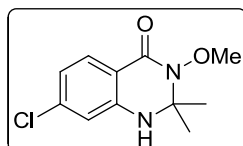

This compound was obtained in 75% yield (36.0 mg) as white solid, m.p.: 239-241 °C.

Eluent: PE/EA = 2/1,  $R_f = 0.65$

$^1\text{H NMR}$  (400 MHz,  $\text{DMSO-}d_6$ ):  $\delta$  7.61 (d,  $J = 8.8$  Hz, 1H), 7.38 (s, 1H), 6.71-6.69 (m, 2H), 3.75 (s, 3H), 1.45 (s, 6H).

$^{13}\text{C NMR}$  (100 MHz,  $\text{DMSO-}d_6$ ):  $\delta$  163.1, 146.7, 138.5, 129.3, 117.2, 113.4, 111.6, 75.7, 64.1, 24.7.

HRMS (ESI) calculated for  $\text{C}_{11}\text{H}_{14}\text{ClN}_2\text{O}_2$  ( $[\text{M}+\text{H}]^+$ ): 241.0738; found: 241.0735.

### 7-bromo-3-methoxy-2,2-dimethyl-2,3-dihydroquinazolin-4(1H)-one (3ha)

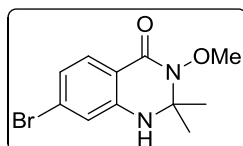

This compound was obtained in 78% yield (44.3 mg) as white solid, m.p.: 220-222 °C.

Eluent: PE/EA = 2/1,  $R_f = 0.65$

$^1\text{H NMR}$  (400 MHz,  $\text{DMSO-}d_6$ ):  $\delta$  7.53 (d,  $J = 8.1$  Hz, 1H), 7.37 (s, 1H), 6.87-6.82 (m, 2H), 3.75 (s, 3H), 1.45 (s, 6H).

**<sup>13</sup>C NMR (100 MHz, DMSO-*d*<sub>6</sub>):** δ 163.2, 146.8, 129.4, 127.6, 120.0, 116.4, 111.9, 75.8, 64.1, 24.7.

**HRMS (ESI)** calculated for C<sub>11</sub>H<sub>14</sub>BrN<sub>2</sub>O<sub>2</sub> ([M+H]<sup>+</sup>): 285.0233; found: 285.0231.

### 3-methoxy-2,2-dimethyl-7-phenyl-2,3-dihydroquinazolin-4(1H)-one (3ia)

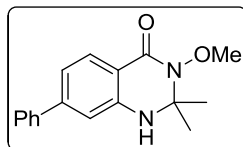

This compound was obtained in 90% yield (50.7 mg) as white solid, m.p.: 180-182 °C.

Eluent: PE/EA = 2/1, R<sub>f</sub> = 0.6

**<sup>1</sup>H NMR (400 MHz, CD<sub>3</sub>OD):** δ 7.78 (d, *J* = 8.2 Hz, 1H), 7.57 (d, *J* = 7.3 Hz, 2H), 7.41 (t, *J* = 7.4 Hz, 2H), 7.34 (t, *J* = 7.3 Hz, 1H), 6.99 (dd, *J* = 8.2, 1.4 Hz, 1H), 6.90 (d, *J* = 1.1 Hz, 1H), 3.86 (s, 3H), 1.56 (s, 6H).

**<sup>13</sup>C NMR (100 MHz, CD<sub>3</sub>OD):** δ 167.1, 148.7, 147.8, 141.6, 129.9, 129.3, 129.2, 128.0, 118.0, 113.8, 113.1, 77.7, 65.3, 25.1.

**HRMS (ESI)** calculated for C<sub>17</sub>H<sub>19</sub>N<sub>2</sub>O<sub>2</sub> ([M+H]<sup>+</sup>): 283.1441; found: 283.1438.

### 3-methoxy-2,2-dimethyl-4-oxo-1,2,3,4-tetrahydroquinazoline-7-carbonitrile (3ja)

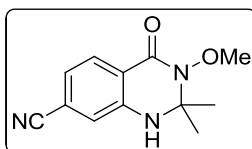

This compound was obtained in 71% yield (32.8 mg) as yellow-green solid, m.p.: 227-229 °C. Eluent: PE/EA = 2/1, R<sub>f</sub> = 0.4

**<sup>1</sup>H NMR (400 MHz, DMSO-*d*<sub>6</sub>):** δ 7.75 (d, *J* = 7.9 Hz, 1H), 7.61 (s, 1H), 7.09-7.00 (m, 2H), 3.77 (s, 3H), 1.48 (s, 6H).

**<sup>13</sup>C NMR (100 MHz, DMSO-*d*<sub>6</sub>):** δ 162.2, 145.6, 128.6, 119.7, 118.4, 117.8, 116.0, 115.9, 75.8, 64.2, 24.8.

**HRMS (ESI)** calculated for C<sub>12</sub>H<sub>14</sub>N<sub>3</sub>O<sub>2</sub> ([M+H]<sup>+</sup>): 232.1081; found: 232.1076.

**methyl**



### 3-methoxy-2,2-dimethyl-4-oxo-1,2,3,4-tetrahydroquinazoline-7-carboxylate (3ka)

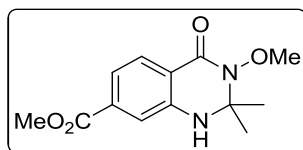

This compound was obtained in 64% yield (33.8 mg) as white solid, m.p.: 223-225 °C.

Eluent: PE/EA = 2/1,  $R_f$  = 0.4

**$^1\text{H}$  NMR (400 MHz, DMSO- $d_6$ ):**  $\delta$  7.73 (d,  $J$  = 8.1 Hz, 1H), 7.41 (s, 1H), 7.30 (s, 1H), 7.22 (dd,  $J$  = 8.2, 1.2 Hz, 1H), 3.83 (s, 3H), 3.77 (s, 3H), 1.47 (s, 6H).

**$^{13}\text{C}$  NMR (100 MHz, DMSO- $d_6$ ):**  $\delta$  165.8, 162.9, 145.7, 134.3, 127.9, 117.2, 116.1, 115.3, 75.8, 64.1, 52.4, 24.7.

**HRMS (ESI)** calculated for  $\text{C}_{13}\text{H}_{17}\text{N}_2\text{O}_4$  ( $[\text{M}+\text{H}]^+$ ): 265.1183; found: 265.1182.

### 3-methoxy-2,2-dimethyl-7-nitro-2,3-dihydroquinazolin-4(1H)-one (3la)

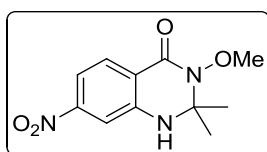

This compound was obtained in 76% yield (38.2 mg) as yellow-green solid, m.p.:

260-261 °C. Eluent: PE/EA = 2/1,  $R_f$  = 0.5

**$^1\text{H}$  NMR (400 MHz, DMSO- $d_6$ ):**  $\delta$  7.86-7.83 (m, 2H), 7.49 (d,  $J$  = 1.8 Hz, 1H), 7.44 (dd,  $J$  = 8.5, 2.0 Hz, 1H), 3.79 (s, 3H), 1.50 (s, 6H).

**$^{13}\text{C}$  NMR (100 MHz, DMSO- $d_6$ ):**  $\delta$  162.0, 151.2, 146.1, 129.3, 117.1, 111.1, 108.9, 75.9, 64.2, 24.9.

**HRMS (ESI)** calculated for  $\text{C}_{11}\text{H}_{14}\text{N}_3\text{O}_4$  ( $[\text{M}+\text{H}]^+$ ): 252.0979; found: 252.0975.

### 3-methoxy-2,2,5-trimethyl-2,3-dihydroquinazolin-4(1H)-one (3ma)

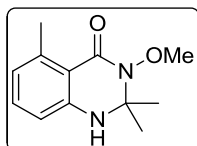

This compound was obtained in 41% yield (18.0 mg) as yellow solid, m.p.: 215-216

°C. Eluent: PE/EA = 2/1,  $R_f$  = 0.8

**<sup>1</sup>H NMR (400 MHz, DMSO-*d*<sub>6</sub>):** δ 7.10 (t, *J* = 7.7 Hz, 1H), 7.00 (s, 1H), 6.53 (d, *J* = 8.1 Hz, 1H), 6.45 (d, *J* = 7.3 Hz, 1H), 3.73 (s, 3H), 2.52 (s, 3H), 1.42 (s, 6H).

**<sup>13</sup>C NMR (100 MHz, DMSO-*d*<sub>6</sub>):** δ 165.3, 147.2, 141.0, 132.9, 120.7, 112.9, 110.6, 74.6, 63.9, 24.4, 22.6.

**HRMS (ESI)** calculated for C<sub>12</sub>H<sub>17</sub>N<sub>2</sub>O<sub>2</sub> ([M+H]<sup>+</sup>): 221.1285; found: 221.1281.

**3-methoxy-2,2-dimethyl-5-(trifluoromethyl)-2,3-dihydroquinazolin-4(1H)-one (3na)**

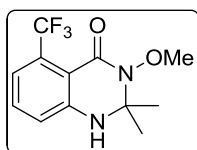

This compound was obtained in 31% yield (17.0 mg) as white solid, m.p.: 239-241 °C.

Eluent: PE/EA = 2/1, R<sub>f</sub> = 0.5

**<sup>1</sup>H NMR (400 MHz, DMSO-*d*<sub>6</sub>):** δ 7.63 (s, 1H), 7.42 (t, *J* = 8.0 Hz, 1H), 7.08 (d, *J* = 7.5 Hz, 1H), 7.00 (d, *J* = 8.2 Hz, 1H), 3.75 (s, 3H), 1.46 (s, 6H).

**<sup>13</sup>C NMR (100 MHz, DMSO-*d*<sub>6</sub>):** δ 161.1, 147.9, 133.2, 128.5 (q, *J* = 31.6 Hz), 123.7 (q, *J* = 272.8 Hz), 120.0, 116.5 (q, *J* = 7.3 Hz), 108.4, 74.4, 64.1, 24.4.

**<sup>19</sup>F NMR (376 MHz, DMSO-*d*<sub>6</sub>):** -58.2.

**HRMS (ESI)** calculated for C<sub>12</sub>H<sub>14</sub>F<sub>3</sub>N<sub>2</sub>O<sub>2</sub> ([M+H]<sup>+</sup>): 275.1002; found: 275.0999.

**5-chloro-3-methoxy-2,2-dimethyl-2,3-dihydroquinazolin-4(1H)-one (3oa)**

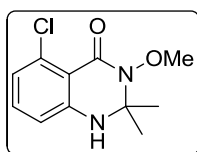

This compound was obtained in 38% yield (18.2 mg) as white solid, m.p.: 198-200 °C.

Eluent: PE/EA = 2/1, R<sub>f</sub> = 0.5

**<sup>1</sup>H NMR (400 MHz, DMSO-*d*<sub>6</sub>):** δ 7.45 (s, 1H), 7.22-7.16 (m, 1H), 6.68 (dd, *J* = 7.6, 1.2 Hz, 1H), 6.65 (dd, *J* = 8.4, 0.8 Hz, 1H), 3.73 (s, 3H), 1.44 (s, 6H).

**<sup>13</sup>C NMR (100 MHz, DMSO-*d*<sub>6</sub>):** δ 162.1, 148.3, 133.9, 133.8, 120.1, 113.9, 108.5, 74.5, 64.0, 24.5.

**HRMS (ESI)** calculated for C<sub>11</sub>H<sub>14</sub>ClN<sub>2</sub>O<sub>2</sub> ([M+H]<sup>+</sup>): 241.0738; found: 241.0736.

**3,6-dimethoxy-2,2-dimethyl-2,3-dihydroquinazolin-4(1H)-one (3pa)**

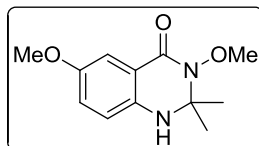

This compound was obtained in 25% yield (11.8 mg) as yellow solid, m.p.: 148-150 °C. Eluent: PE/EA = 2/1, R<sub>f</sub> = 0.6

**<sup>1</sup>H NMR (400 MHz, DMSO-*d*<sub>6</sub>):** δ 7.14 (d, *J* = 3.0 Hz, 1H), 6.96 (dd, *J* = 8.8, 3.1 Hz, 1H), 6.67-6.64 (m, 2H), 3.76 (s, 3H), 3.69 (s, 3H), 1.43 (s, 6H).

**<sup>13</sup>C NMR (100 MHz, DMSO-*d*<sub>6</sub>):** δ 163.7, 151.2, 140.1, 122.2, 116.1, 113.2, 109.1, 75.8, 63.8, 55.1, 24.1.

**HRMS (ESI)** calculated for C<sub>12</sub>H<sub>17</sub>N<sub>2</sub>O<sub>3</sub> ([M+H]<sup>+</sup>): 237.1234; found: 237.1233.

**3,8-dimethoxy-2,2-dimethyl-2,3-dihydroquinazolin-4(1H)-one (3pa')**

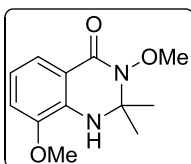

This compound was obtained in 38% yield (17.9 mg) as green solid, m.p.: 154-156 °C. Eluent: PE/EA = 2/1, R<sub>f</sub> = 0.7

**<sup>1</sup>H NMR (400 MHz, DMSO-*d*<sub>6</sub>):** δ 7.25 (dd, *J* = 8.0, 1.1 Hz, 1H), 6.98 (dd, *J* = 7.9, 1.1 Hz, 1H), 6.66 (t, *J* = 8.0 Hz, 1H), 6.42 (s, 1H), 3.81 (s, 3H), 3.75 (s, 3H), 1.48 (s, 6H).

**<sup>13</sup>C NMR (100 MHz, DMSO-*d*<sub>6</sub>):** δ 163.9, 146.3, 135.9, 118.7, 116.8, 114.0, 112.8, 76.2, 64.0, 55.7, 24.3.

**HRMS (ESI)** calculated for C<sub>12</sub>H<sub>17</sub>N<sub>2</sub>O<sub>3</sub> ([M+H]<sup>+</sup>): 237.1234; found: 237.1232.

**6-chloro-3-methoxy-2,2-dimethyl-2,3-dihydroquinazolin-4(1H)-one (3qa)**

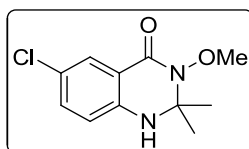

This compound was obtained in 59% yield (28.4 mg) as yellow solid, m.p.: 176-178 °C. Eluent: PE/EA = 2/1,  $R_f = 0.6$

**$^1\text{H}$  NMR (400 MHz, DMSO- $d_6$ ):**  $\delta$  7.54 (d,  $J = 2.6$  Hz, 1H), 7.31 (s, 1H), 7.31-7.28 (m, 1H), 6.70 (d,  $J = 8.7$  Hz, 1H), 3.75 (s, 3H), 1.45 (s, 6H).

**$^{13}\text{C}$  NMR (100 MHz, DMSO- $d_6$ ):**  $\delta$  162.7, 144.6, 133.7, 126.2, 120.8, 116.5, 113.9, 75.8, 64.1, 24.6.

**HRMS (ESI)** calculated for  $\text{C}_{11}\text{H}_{14}\text{ClN}_2\text{O}_2$  ( $[\text{M}+\text{H}]^+$ ): 241.0738; found: 241.0736.

### 3-methoxy-2,2-dimethyl-2,3-dihydrobenzo[*h*]quinazolin-4(1H)-one (3ra)

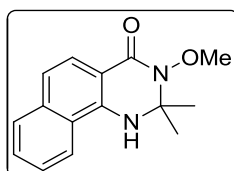

This compound was obtained in 50% yield (25.5 mg) as yellow solid, m.p.: 190-192 °C. Eluent: PE/EA = 2/1,  $R_f = 0.6$

**$^1\text{H}$  NMR (400 MHz,  $\text{CD}_3\text{OD}$ ):**  $\delta$  9.33 (d,  $J = 8.7$  Hz, 1H), 7.73 (d,  $J = 8.9$  Hz, 1H), 7.62 (d,  $J = 8.0$  Hz, 1H), 7.45 (t,  $J = 7.8$  Hz, 1H), 7.22 (t,  $J = 7.4$  Hz, 1H), 6.84 (d,  $J = 8.9$  Hz, 1H), 3.85 (s, 3H), 1.56 (s, 6H).

**$^{13}\text{C}$  NMR (100 MHz,  $\text{CD}_3\text{OD}$ ):**  $\delta$  169.3, 148.9, 137.1, 134.3, 129.7, 129.6, 129.3, 125.5, 123.8, 117.8, 102.0, 76.6, 65.3, 24.4.

**HRMS (ESI)** calculated for  $\text{C}_{15}\text{H}_{17}\text{N}_2\text{O}_2$  ( $[\text{M}+\text{H}]^+$ ): 257.1285; found: 257.1281.

### 7-chloro-3-methoxy-2,2-dimethyl-2,3-dihydropyrido[2,3-*d*]pyrimidin-4(1H)-one (3sa)

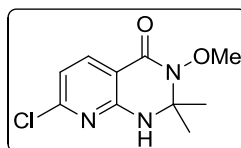

This compound was obtained in 74% yield (35.7 mg) as white solid, m.p.: 219-200 °C.

Eluent: PE/EA = 2/1,  $R_f$  = 0.6

**$^1\text{H}$  NMR (400 MHz, DMSO- $d_6$ ):**  $\delta$  8.47 (s, 1H), 7.93 (d,  $J$  = 7.9 Hz, 1H), 6.76 (d,  $J$  = 7.9 Hz, 1H), 3.76 (s, 3H), 1.49 (s, 6H).

**$^{13}\text{C}$  NMR (100 MHz, DMSO- $d_6$ ):**  $\delta$  161.9, 155.4, 153.6, 139.4, 113.1, 106.2, 75.3, 64.2, 25.1.

**HRMS (ESI)** calculated for  $\text{C}_{10}\text{H}_{13}\text{ClN}_3\text{O}_2$  ( $[\text{M}+\text{H}]^+$ ): 242.0691; found: 242.0691.

**3-methoxy-2,2-dimethyl-2,3-dihydro-4H-pyrano[3,2-g]quinazoline-4,8(1H)-dione (3ta)**

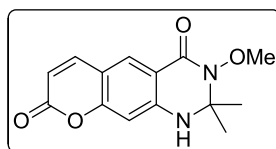

This compound was obtained in 70% yield (38.4 mg) as yellow solid, m.p.: 261-263 °C. Eluent: PE/EA = 2/1,  $R_f$  = 0.3.

**$^1\text{H}$  NMR (400 MHz, DMSO- $d_6$ ):**  $\delta$  8.01 (s, 1H), 7.96 (d,  $J$  = 9.7 Hz, 1H), 7.93 (s, 1H), 6.48 (s, 1H), 6.14 (d,  $J$  = 9.5 Hz, 1H), 3.77 (s, 3H), 1.49 (s, 6H).

**$^{13}\text{C}$  NMR (100 MHz, DMSO- $d_6$ ):**  $\delta$  162.6, 159.9, 158.0, 148.4, 144.7, 129.3, 110.8, 110.4, 110.3, 99.3, 75.7, 64.2, 25.1.

**HRMS (ESI)** calculated for  $\text{C}_{14}\text{H}_{15}\text{N}_2\text{O}_4$  ( $[\text{M}+\text{H}]^+$ ): 275.1026; found: 275.1024.

**3-methoxy-2,2-dimethyl-7-(5-(trifluoromethyl)-1,2,4-oxadiazol-3-yl)-2,3-dihydroquinazolin-4(1H)-one (3ua)**

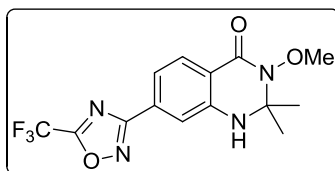

This compound was obtained in 71% yield (48.6 mg) as yellow solid, m.p.: 190-192 °C. Eluent: PE/EA = 2/1,  $R_f$  = 0.7.

**$^1\text{H}$  NMR (400 MHz, DMSO- $d_6$ ):**  $\delta$  7.81 (d,  $J$  = 8.1 Hz, 1H), 7.53 (s, 1H), 7.41 (s,

1H), 7.33 (d,  $J = 8.1$  Hz, 1H), 3.79 (s, 3H), 1.49 (s, 6H).

$^{13}\text{C}$  NMR (100 MHz, DMSO- $d_6$ ): 166.0, 165.1 (q,  $J = 43.7$  Hz), 162.8, 146.1, 129.0, 128.7, 115.8 (q,  $J = 271.8$  Hz), 115.5, 115.4, 113.2, 75.8, 64.1, 24.7.

$^{19}\text{F}$  NMR (376 MHz, DMSO- $d_6$ ): -64.9.

HRMS (ESI) calculated for  $\text{C}_{14}\text{H}_{14}\text{F}_3\text{N}_4\text{O}_3$  ( $[\text{M}+\text{H}]^+$ ): 343.1013; found: 343.1007.

### 3-methoxy-2,2-dimethyl-4-oxo-*N,N*-dipropyl-1,2,3,4-tetrahydroquinazoline-7-sulfonamide (3va)

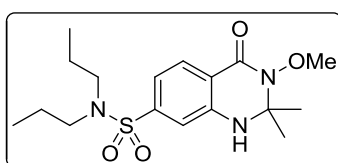

This compound was obtained in 73% yield (53.9 mg) as yellow solid, m.p.: 166-168 °C. Eluent: PE/EA = 2/1,  $R_f = 0.7$ .

$^1\text{H}$  NMR (400 MHz, DMSO- $d_6$ ):  $\delta$  7.79 (d,  $J = 8.2$  Hz, 1H), 7.58 (s, 1H), 7.10 (s, 1H), 7.02 (d,  $J = 8.2$  Hz, 1H), 3.77 (s, 3H), 3.02 (t,  $J = 7.5$  Hz, 4H), 1.52-1.42 (m, 10H), 0.80 (t,  $J = 7.3$  Hz, 6H).

$^{13}\text{C}$  NMR (100 MHz, DMSO- $d_6$ ):  $\delta$  162.5, 145.8, 144.2, 128.7, 115.2, 114.4, 112.5, 75.8, 64.1, 49.6, 24.7, 21.6, 11.0.

HRMS (ESI) calculated for  $\text{C}_{17}\text{H}_{28}\text{N}_3\text{O}_4\text{S}$  ( $[\text{M}+\text{H}]^+$ ): 370.1795; found: 370.1791.

### 6-(cyclopropylmethoxy)-7-(difluoromethoxy)-3-methoxy-2,2-dimethyl-2,3-dihydroquinazolin-4(1H)-one (3wa)

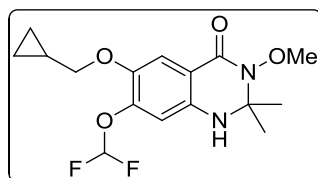

This compound was obtained in 76% yield (52.2 mg) as yellow solid, m.p.: 145-147 °C. Eluent: PE/EA = 2/1,  $R_f = 0.7$

$^1\text{H}$  NMR (400 MHz, DMSO- $d_6$ ):  $\delta$  7.26 (s, 1H), 7.15 (t,  $J = 74.0$  Hz, 1H), 6.96 (s,

1H), 6.49 (s, 1H), 3.78 (d,  $J = 6.9$  Hz, 2H), 3.74 (s, 3H), 1.43 (s, 6H), 1.22-1.16 (m, 1H), 0.57-0.52 (m, 2H), 0.33-0.30 (m, 2H).

$^{13}\text{C}$  NMR (100 MHz, DMSO- $d_6$ ):  $\delta$  163.3, 145.5, 141.5, 140.9, 116.4 (t,  $J = 258.1$  Hz), 113.0, 109.6, 106.0, 76.0, 73.8, 64.1, 24.4, 10.1, 3.0.

$^{19}\text{F}$  NMR (376 MHz, DMSO- $d_6$ ): -81.68 (d,  $J = 76.5$  Hz).

HRMS (ESI) calculated for  $\text{C}_{16}\text{H}_{21}\text{F}_2\text{N}_2\text{O}_4$  ( $[\text{M}+\text{H}]^+$ ): 343.1464; found: 343.1460.

### 3-ethoxy-2,2-dimethyl-2,3-dihydroquinazolin-4(1H)-one (3xa)

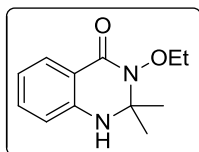

This compound was obtained in 76% yield (33.5 mg) as yellow solid, m.p.: 175-178 °C. Eluent: PE/EA = 2/1,  $R_f = 0.7$ .

$^1\text{H}$  NMR (400 MHz, DMSO- $d_6$ ):  $\delta$  7.61 (d,  $J = 7.7$  Hz, 1H), 7.31-7.24 (m, 1H), 7.07 (s, 1H), 6.70-6.66 (m, 2H), 3.97 (q,  $J = 7.1$  Hz, 2H), 1.44 (s, 6H), 1.19 (t,  $J = 7.1$  Hz, 3H).

$^{13}\text{C}$  NMR (100 MHz, DMSO- $d_6$ ):  $\delta$  164.2, 145.8, 133.9, 127.3, 117.0, 114.4, 112.9, 75.5, 71.6, 24.6, 13.4.

HRMS (ESI) calculated for  $\text{C}_{12}\text{H}_{17}\text{N}_2\text{O}_2$  ( $[\text{M}+\text{H}]^+$ ): 221.1285; found: 221.1284.

### 3-(benzyloxy)-2,2-dimethyl-2,3-dihydroquinazolin-4(1H)-one (3ya)

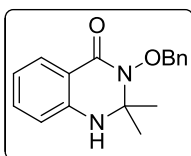

This compound was obtained in 63% yield (35.5 mg) as yellow oil. Eluent: PE/EA = 2/1,  $R_f = 0.75$ .

$^1\text{H}$  NMR (400 MHz,  $\text{CD}_3\text{OD}$ ):  $\delta$  7.78-7.73 (m, 1H), 7.49 (dd,  $J = 7.3, 1.3$  Hz, 2H), 7.40-7.34 (m, 3H), 7.31-7.26 (m, 1H), 6.74 (t,  $J = 7.5$  Hz, 1H), 6.69 (d,  $J = 8.2$  Hz, 1H), 5.02 (s, 2H), 1.52 (s, 6H).

$^{13}\text{C}$  NMR (100 MHz,  $\text{CD}_3\text{OD}$ ):  $\delta$  167.4, 147.5, 136.6, 135.5, 130.6, 129.7, 129.4,

128.6, 118.8, 115.8, 114.3, 80.0, 77.6, 25.2.

**HRMS (ESI)** calculated for C<sub>17</sub>H<sub>19</sub>N<sub>2</sub>O<sub>2</sub> ([M+H]<sup>+</sup>): 283.1441; found: 283.1441.

### 2-ethyl-3-methoxy-2-methyl-2,3-dihydroquinazolin-4(1H)-one (3ab)

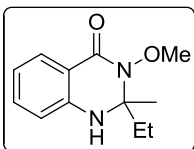

This compound was obtained in 65% yield (28.6 mg) as yellow solid, m.p.: 105-107 °C. Eluent: PE/EA = 2/1, R<sub>f</sub> = 0.6.

**<sup>1</sup>H NMR (400 MHz, DMSO-*d*<sub>6</sub>):** δ 7.58 (d, *J* = 7.8 Hz, 1H), 7.28-7.22 (m, 1H), 7.06 (s, 1H), 6.70-6.61 (m, 2H), 3.77 (s, 3H), 1.87 (dq, *J* = 14.6, 7.3 Hz, 1H), 1.67 (dq, *J* = 14.7, 7.4 Hz, 1H), 1.46 (s, 3H), 0.87 (t, *J* = 7.4 Hz, 3H).

**<sup>13</sup>C NMR (100 MHz, DMSO-*d*<sub>6</sub>):** δ 163.9, 145.9, 133.9, 127.1, 116.7, 114.0, 112.5, 78.3, 63.9, 29.7, 23.2, 8.4.

**HRMS (ESI)** calculated for C<sub>12</sub>H<sub>17</sub>N<sub>2</sub>O<sub>2</sub> ([M+H]<sup>+</sup>): 221.1285; found: 221.1285.

Another reaction was conducted using 3,4-dimethylisoxazol-5(4H)-one as the coupling partner to react with *N*-methoxybenzamide **1a** under the standard conditions, affording the desired product 3ab in 29% (12.8 mg) isolated yield.

### 3-methoxy-2-methyl-2-propyl-2,3-dihydroquinazolin-4(1H)-one (3ac)

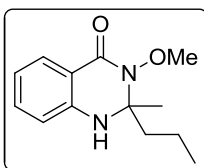

This compound was obtained in 63% yield (29.5 mg) as yellow solid, m.p.: 181-183 °C. Eluent: PE/EA = 2/1, R<sub>f</sub> = 0.5.

**<sup>1</sup>H NMR (400 MHz, DMSO-*d*<sub>6</sub>):** δ 7.58 (d, *J* = 7.8 Hz, 1H), 7.24 (t, *J* = 7.6 Hz, 1H), 7.06 (s, 1H), 6.68-6.61 (m, 2H), 3.76 (s, 3H), 1.85-1.75 (m, 1H), 1.68-1.58 (m, 1H), 1.47 (s, 3H), 1.41-1.28 (m, 2H), 0.82 (t, *J* = 7.3 Hz, 3H).

**<sup>13</sup>C NMR (100 MHz, DMSO-*d*<sub>6</sub>):** δ 163.8, 145.9, 133.9, 127.1, 116.7, 113.9, 112.5,



77.9, 63.8, 23.8, 16.9, 14.1.

**HRMS (ESI)** calculated for C<sub>13</sub>H<sub>19</sub>N<sub>2</sub>O<sub>2</sub> ([M+H]<sup>+</sup>): 235.1441; found: 235.1441.

**2-isopropyl-3-methoxy-2-methyl-2,3-dihydroquinazolin-4(1H)-one (3ad)**

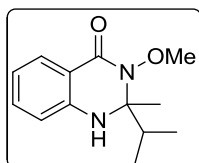

This compound was obtained in 61% yield (28.5 mg) as yellow solid, m.p.: 143-145 °C. Eluent: PE/EA = 2/1, R<sub>f</sub> = 0.65.

**<sup>1</sup>H NMR (400 MHz, DMSO-*d*<sub>6</sub>):** δ 7.55 (d, *J* = 7.8 Hz, 1H), 7.22 (t, *J* = 7.6 Hz, 1H), 6.99 (s, 1H), 6.70 (d, *J* = 8.3 Hz, 1H), 6.61 (t, *J* = 7.5 Hz, 1H), 3.77 (s, 3H), 2.25-2.15 (m, 1H), 1.50 (s, 3H), 0.92 (d, *J* = 6.9 Hz, 3H), 0.82 (d, *J* = 6.8 Hz, 3H).

**<sup>13</sup>C NMR (100 MHz, DMSO-*d*<sub>6</sub>):** δ 162.2, 145.8, 133.7, 126.9, 116.3, 113.5, 112.6, 80.4, 63.9, 35.4, 21.2, 17.8, 16.8.

**HRMS (ESI)** calculated for C<sub>13</sub>H<sub>19</sub>N<sub>2</sub>O<sub>2</sub> ([M+H]<sup>+</sup>): 235.1441; found: 235.1441.

**2-cyclopropyl-3-methoxy-2-methyl-2,3-dihydroquinazolin-4(1H)-one (3ae)**

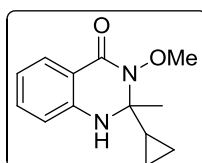

This compound was obtained in 60% yield (27.8 mg) as yellow solid, m.p.: 163-165 °C. Eluent: PE/EA = 2/1, R<sub>f</sub> = 0.6.

**<sup>1</sup>H NMR (400 MHz, DMSO-*d*<sub>6</sub>):** δ 7.57 (d, *J* = 7.7 Hz, 1H), 7.23 (t, *J* = 7.7 Hz, 1H), 6.83 (s, 1H), 6.67-6.61 (m, 2H), 3.78 (s, 3H), 1.47 (s, 3H), 1.41-1.35 (m, 1H), 0.52-0.42 (m, 2H), 0.34-0.24 (m, 2H).

**<sup>13</sup>C NMR (100 MHz, DMSO-*d*<sub>6</sub>):** δ 163.2, 146.0, 133.9, 127.0, 116.7, 113.6, 112.4, 77.5, 63.9, 23.5, 18.4, 1.7, 1.2.

**HRMS (ESI)** calculated for C<sub>13</sub>H<sub>17</sub>N<sub>2</sub>O<sub>2</sub> ([M+H]<sup>+</sup>): 233.1285; found: 233.1284.

### 2-cyclobutyl-3-methoxy-2-methyl-2,3-dihydroquinazolin-4(1H)-one (3af)

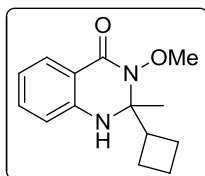

This compound was obtained in 55% yield (27.2 mg) as yellow solid, m.p.: 194-196 °C. Eluent: PE/EA = 2/1,  $R_f = 0.7$ .

**$^1\text{H}$  NMR (400 MHz, DMSO- $d_6$ ):**  $\delta$  7.54 (d,  $J = 7.8$  Hz, 1H), 7.27-7.21 (m, 1H), 7.05 (s, 1H), 6.75 (d,  $J = 8.2$  Hz, 1H), 6.61 (t,  $J = 7.4$  Hz, 1H), 3.72 (s, 3H), 2.97-2.84 (m, 1H), 2.09-1.97 (m, 1H), 1.89-1.85 (m, 1H), 1.81-1.73 (m, 1H), 1.73-1.64 (m, 2H), 1.59-1.51 (m, 1H), 1.38 (s, 3H).

**$^{13}\text{C}$  NMR (100 MHz, DMSO- $d_6$ ):**  $\delta$  163.2, 146.2, 133.8, 126.9, 116.4, 113.7, 112.4, 78.4, 63.8, 42.7, 23.4, 22.7, 21.2, 16.6.

**HRMS (ESI)** calculated for  $\text{C}_{14}\text{H}_{19}\text{N}_2\text{O}_2$  ( $[\text{M}+\text{H}]^+$ ): 247.1441; found: 247.1438.

### 3-methoxy-2-methyl-2-phenyl-2,3-dihydroquinazolin-4(1H)-one (3ag)

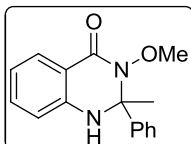

This compound was obtained in 23% yield (12.3 mg) as yellow solid, m.p.: 212-214 °C. Eluent: PE/EA = 2/1,  $R_f = 0.7$ .

**$^1\text{H}$  NMR (400 MHz, DMSO- $d_6$ ):**  $\delta$  7.96 (s, 1H), 7.56 (d,  $J = 7.8$  Hz, 1H), 7.47 (d,  $J = 7.6$  Hz, 2H), 7.31-7.19 (m, 4H), 6.72 (d,  $J = 8.1$  Hz, 1H), 6.65 (t,  $J = 7.5$  Hz, 1H), 3.77 (s, 3H), 1.89 (s, 3H).

**$^{13}\text{C}$  NMR (100 MHz, DMSO- $d_6$ ):**  $\delta$  163.7, 145.8, 144.1, 133.9, 128.1, 127.7, 127.3, 125.6, 117.5, 114.4, 113.7, 79.0, 64.3, 26.2.

**HRMS (ESI)** calculated for  $\text{C}_{16}\text{H}_{17}\text{N}_2\text{O}_2$  ( $[\text{M}+\text{H}]^+$ ): 269.1285; found: 269.1281.

## III. Experimental Mechanistic Studies

## Deuterium-labeling experiment:

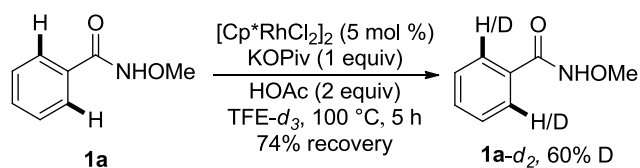

**1a** (0.1 mmol, 1 equiv) was dissolved in TFE- $d_3$  (1.0 mL) in the presence of  $[\text{Cp}^*\text{RhCl}_2]_2$  (5 mol %), KOiPr (1 equiv) and HOAc (2 equiv). The mixture was stirred at 100 °C in an oil bath for 5 h. Afterwards, the mixture was diluted with EtOAc and transferred to a round bottom flask. The solvent was evaporated under reduced pressure and the recovered **1a** was purified by preparative TLC. The deuterium incorporation was analyzed by  $^1\text{H-NMR}$  and approximate 60% deuteration was detected at the *ortho* position of the DG.

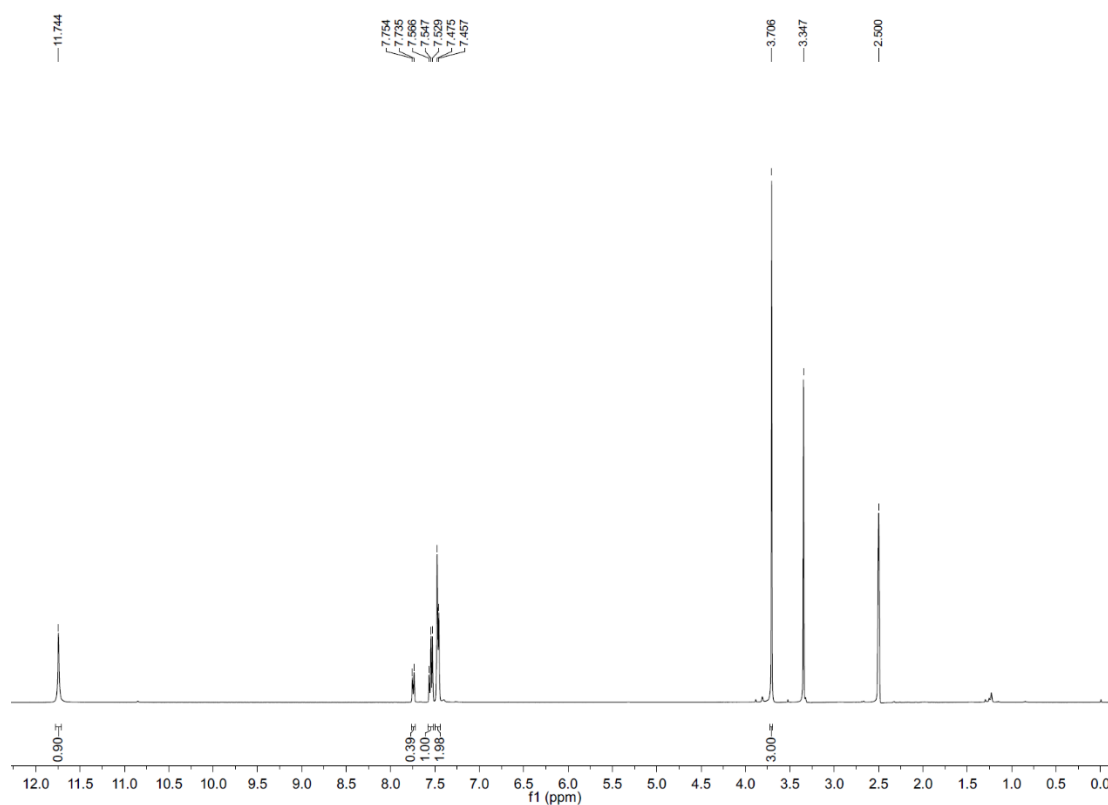

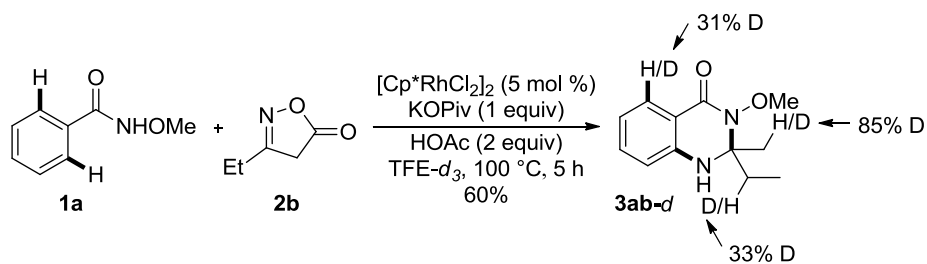

The mixture of *N*-methoxybenzamide **1a** (0.1 mmol, 1 equiv), 3-ethylisoxazol-5(4*H*)-one **2b** (1.2 equiv),  $[\text{Cp}^*\text{RhCl}_2]_2$  (5 mol %), KOPiv (1 equiv) and HOAc (2 equiv) in  $\text{TFE-}d_3$  (1.0 mL) was stirred at  $100\text{ }^\circ\text{C}$  in an oil bath for 5 h without exclusion of air or moisture. Afterwards, the solvent was removed under reduce pressure, and the resulted mixture was purified by preparative TLC to afford the corresponding product **3ab**. The deuterium incorporation was analyzed by  $^1\text{H-NMR}$ .

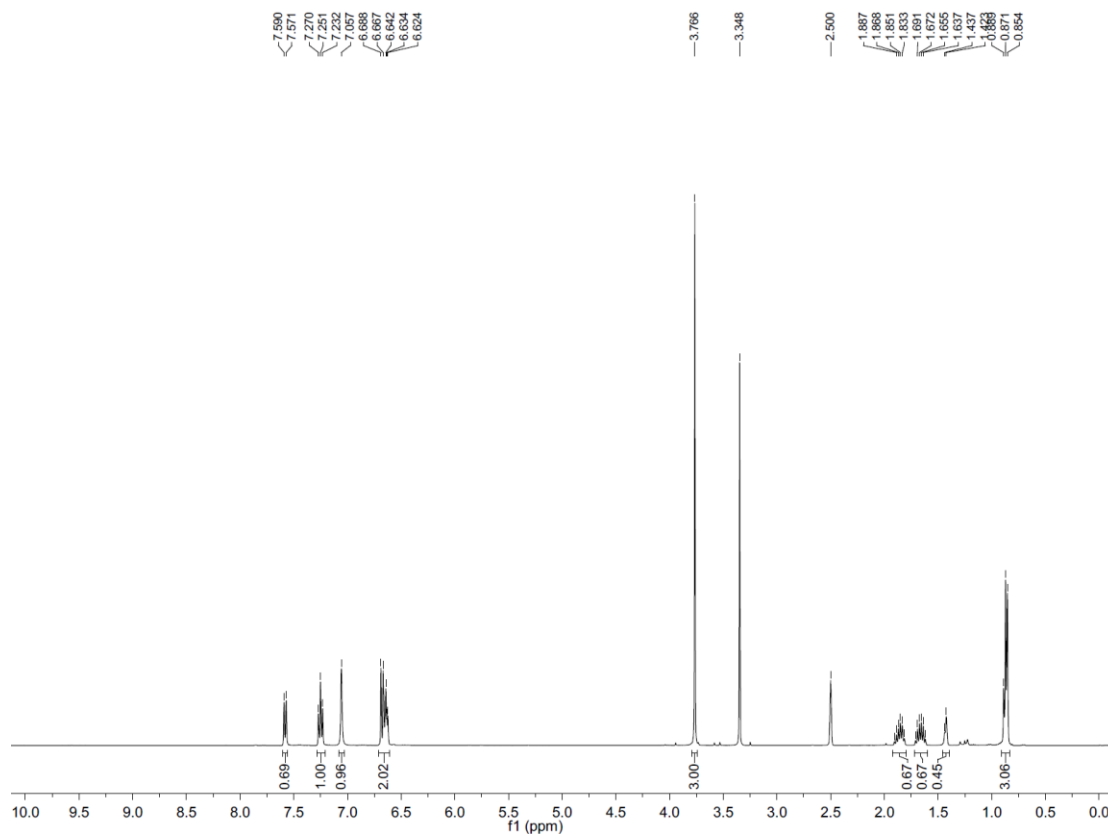

**Kinetic isotope study:**

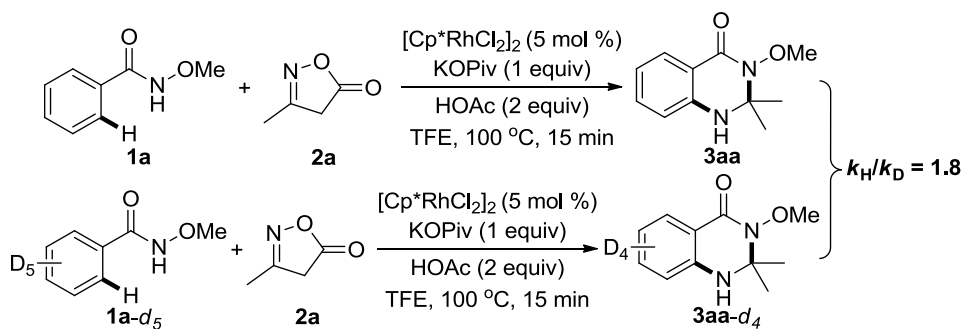

The mixture of *N*-methoxybenzamide **1a** or **1a-d<sub>5</sub>** (0.1 mmol, 1 equiv), 3-methylisoxazol-5(4*H*)-one **2a** (1.2 equiv), [Cp\*RhCl<sub>2</sub>]<sub>2</sub> (5 mol %), KOPIv (1 equiv) and HOAc (2 equiv) in TFE (1.0 mL) was stirred at 100 °C in an oil bath for 15 min without exclusion of air or moisture. Afterwards, the two reactions were mixed and the solvent was removed under reduce pressure, the resulted mixture was purified by preparative TLC to afford the corresponding product **3aa/3aa-d<sub>4</sub>**. The singlet and doublet at  $\delta$  3.75 (3H) and 7.61 (0.64H) were selected to measure the KIE, and the primary KIE value was determined to be  $k_H/k_D = 1.8$ .

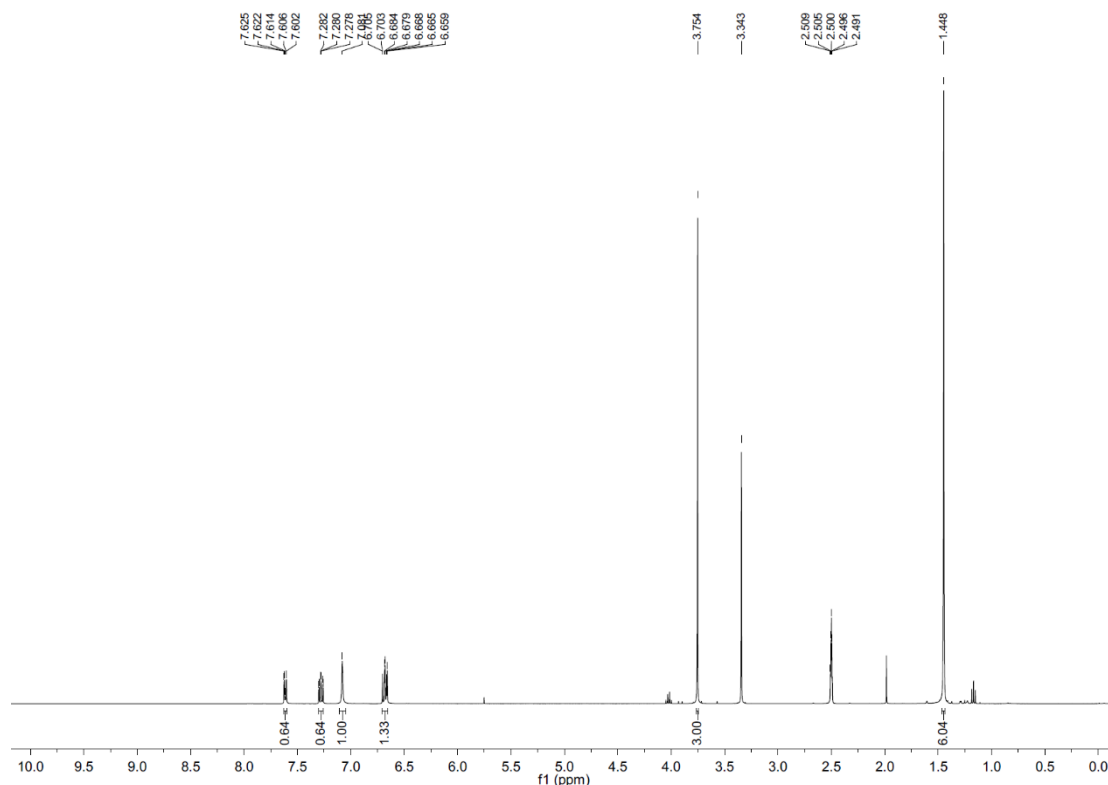

### Preliminary investigation on the C-NH<sub>2</sub> formation:

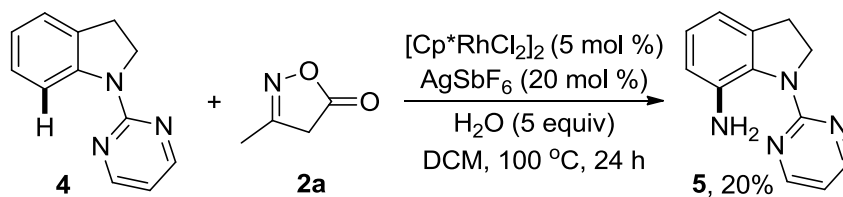

The mixture of 1-(pyrimidin-2-yl)indoline **4** (0.2 mmol, 1 equiv), 3-methylisoxazol-5(4*H*)-one **2a** (1.2 equiv), [Cp\*RhCl<sub>2</sub>]<sub>2</sub> (5 mol %), AgSbF<sub>6</sub> (20 mol %) and H<sub>2</sub>O (5 equiv) in DCM (2.0 mL) was stirred at 100 °C in an oil bath for 24 h without exclusion of air or moisture. Afterwards, the solvent was removed under reduce pressure; the resulted mixture was purified by preparative TLC (eluent: PE/EA = 2/1, R<sub>f</sub> = 0.6) to afford the corresponding product **5** in 20% isolated yield (8.5 mg) as a brown oil.

<sup>1</sup>H NMR (400 MHz, DMSO-*d*<sub>6</sub>): δ 8.50 (d, *J* = 4.8 Hz, 2H), 6.86-6.76 (m, 2H), 6.64-6.57 (m, 2H), 5.25 (brs, 2H), 4.28 (t, *J* = 7.9 Hz, 2H), 2.95 (t, *J* = 7.8 Hz, 2H).

<sup>13</sup>C NMR (100 MHz, DMSO-*d*<sub>6</sub>): δ 159.1, 158.1, 138.0, 135.3, 129.8, 124.6, 116.2, 113.5, 111.0, 51.8, 28.8.

HRMS (ESI) calculated for C<sub>12</sub>H<sub>13</sub>N<sub>4</sub> ([M+H]<sup>+</sup>): 213.1135; found: 213.1137.

### Derivatization of compound 3aa:

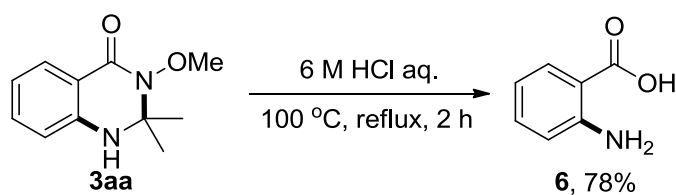

The mixture of 2,3-dihydroquinazolin-4(1*H*)-one **3aa** (0.2 mmol) in 6M HCl aqueous solution (1 mL) was stirred at 100 °C in an oil bath, the resulted mixture was allowed to reflux for 2 h without exclusion of air or moisture. Afterwards, the mixture was neutralized by adding the Na<sub>2</sub>CO<sub>3</sub> aqueous solution. The resulted mixture was extracted by EA for three times and the organic solvent was combined and dried over MgSO<sub>4</sub>. The organic solvent was removed under reduce pressure and the resulted mixture was purified by preparative TLC (eluent: DCM/MeOH = 10/1, R<sub>f</sub> = 0.4) to afford the corresponding product **6** in 78% isolated yield (21.5 mg) as a white solid.

The compound **6** was a known compound and the characterization data was in agreement with literature precedent.<sup>S3</sup> **<sup>1</sup>H NMR (400 MHz, DMSO-*d*<sub>6</sub>):**  $\delta$  8.54 (brs, 2H), 7.68 (d,  $J = 7.8$  Hz, 1H), 7.21 (t,  $J = 7.4$  Hz, 1H), 6.73 (d,  $J = 8.2$  Hz, 1H), 6.49 (t,  $J = 7.3$  Hz, 1H). **<sup>13</sup>C NMR (100 MHz, CDCl<sub>3</sub>):**  $\delta$  173.9, 151.2, 135.3, 132.3, 116.9, 116.6, 109.7.

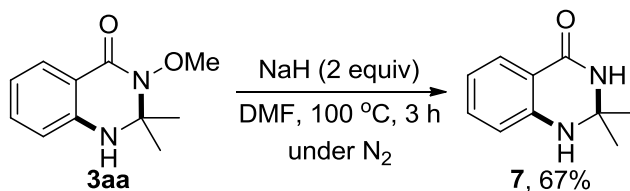

2,3-Dihydroquinazolin-4(1H)-one **3aa** (0.2 mmol) was added to a solution of 60% NaH (0.4 mmol, 2 equiv) in dry DMF (2 mL) under the nitrogen atmosphere, the resulted mixture was stirred at 100 °C in an oil bath for 3 h. Afterwards, the mixture was diluted with EA and washed with water. The aqueous phase was extracted with EA for three times and the organic solvent was combined and dried over MgSO<sub>4</sub>. The organic solvent was removed under reduce pressure and the resulted mixture was purified by preparative TLC (eluent: PE/EA = 1/1, R<sub>f</sub> = 0.5) to afford the corresponding product **7** in 67% isolated yield (23.5 mg) as a white solid.

The compound **7** was a known compound and the characterization data was in agreement with literature precedent.<sup>S4</sup> **<sup>1</sup>H NMR (400 MHz, DMSO-*d*<sub>6</sub>):**  $\delta$  7.96 (s, 1H), 7.56 (d,  $J = 7.8$  Hz, 1H), 7.21 (t,  $J = 7.6$  Hz, 1H), 6.66 (s, 1H), 6.64-6.59 (m, 2H), 1.37 (s, 6H).

## IV. DFT Calculations

### Computational details:

Gaussian 09 program<sup>S5</sup> has been used to perform all the theoretical calculations. Geometry optimizations and frequency analyses were calculated using the B3LYP functional<sup>S6</sup> with a standard 6-31G(d) basis set (Lanl2dz basis set for Rh) in gas phase. Single point energies were further calculated at the M06 functional<sup>S7</sup> with a standard 6-311++G(d,p) basis set (SDD<sup>S8</sup> basis set for Rh) level using SMD solvation model<sup>S9</sup>

(solvent = 2,2,2-TriFluoroEthanol). Throughout the paper, the energies presented are the M06-calculated Gibbs free energies in TFE solvent with B3LYP-calculated thermodynamic corrections.

**Various energy values for all of the relevant species** [gas phase results optimized at the level of B3LYP/6-31G(d) (Lan12dz for Rh)] as well as the single-point results with SMD atomic radii for experimental solvent TFE at the M06/6-311++G(d,p) (SDD for Rh) (SMD)]:

## 2a

|                                              |                             |
|----------------------------------------------|-----------------------------|
| Zero-point correction=                       | 0.089828 (Hartree/Particle) |
| Thermal correction to Energy=                | 0.096064                    |
| Thermal correction to Enthalpy=              | 0.097009                    |
| Thermal correction to Gibbs Free Energy=     | 0.059750                    |
| Sum of electronic and zero-point Energies=   | -360.494685                 |
| Sum of electronic and thermal Energies=      | -360.488449                 |
| Sum of electronic and thermal Enthalpies=    | -360.487504                 |
| Sum of electronic and thermal Free Energies= | -360.524763                 |

SCF Done: E(RM06) = -360.481898677 A.U. after 14 cycles  
 NFock= 14 Conv=0.20D-08 -V/T= 2.0036  
 SMD-CDS (non-electrostatic) energy (kcal/mol) = 5.45  
 (included in total energy above)

## CH<sub>3</sub>COOH

|                                              |                             |
|----------------------------------------------|-----------------------------|
| Zero-point correction=                       | 0.062045 (Hartree/Particle) |
| Thermal correction to Energy=                | 0.066610                    |
| Thermal correction to Enthalpy=              | 0.067554                    |
| Thermal correction to Gibbs Free Energy=     | 0.034805                    |
| Sum of electronic and zero-point Energies=   | -229.015563                 |
| Sum of electronic and thermal Energies=      | -229.010998                 |
| Sum of electronic and thermal Enthalpies=    | -229.010054                 |
| Sum of electronic and thermal Free Energies= | -229.042803                 |

SCF Done: E(RM06) = -229.038360949 A.U. after 11 cycles  
 NFock= 11 Conv=0.68D-08 -V/T= 2.0034  
 SMD-CDS (non-electrostatic) energy (kcal/mol) = 5.16  
 (included in total energy above)

## CO<sub>2</sub>

|                        |                             |
|------------------------|-----------------------------|
| Zero-point correction= | 0.011619 (Hartree/Particle) |
|------------------------|-----------------------------|



|                                              |             |
|----------------------------------------------|-------------|
| Thermal correction to Energy=                | 0.014260    |
| Thermal correction to Enthalpy=              | 0.015204    |
| Thermal correction to Gibbs Free Energy=     | -0.009098   |
| Sum of electronic and zero-point Energies=   | -188.565952 |
| Sum of electronic and thermal Energies=      | -188.563311 |
| Sum of electronic and thermal Enthalpies=    | -188.562367 |
| Sum of electronic and thermal Free Energies= | -188.586668 |

SCF Done: E(RM06) = -188.549356609 A.U. after 8 cycles  
 NFock= 8 Conv=0.76D-08 -V/T= 2.0031

SMD-CDS (non-electrostatic) energy (kcal/mol) = 8.91  
 (included in total energy above)

### **Cp\*(OAc)<sub>2</sub>**

|                                              |                             |
|----------------------------------------------|-----------------------------|
| Zero-point correction=                       | 0.327358 (Hartree/Particle) |
| Thermal correction to Energy=                | 0.351522                    |
| Thermal correction to Enthalpy=              | 0.352466                    |
| Thermal correction to Gibbs Free Energy=     | 0.273528                    |
| Sum of electronic and zero-point Energies=   | -956.300107                 |
| Sum of electronic and thermal Energies=      | -956.275943                 |
| Sum of electronic and thermal Enthalpies=    | -956.274999                 |
| Sum of electronic and thermal Free Energies= | -956.353937                 |

SCF Done: E(RM06) = -957.390074159 A.U. after 17 cycles  
 NFock= 17 Conv=0.80D-08 -V/T= 2.0831

SMD-CDS (non-electrostatic) energy (kcal/mol) = 6.91  
 (included in total energy above)

### **PC**

|                                              |                             |
|----------------------------------------------|-----------------------------|
| Zero-point correction=                       | 0.240077 (Hartree/Particle) |
| Thermal correction to Energy=                | 0.253935                    |
| Thermal correction to Enthalpy=              | 0.254880                    |
| Thermal correction to Gibbs Free Energy=     | 0.200126                    |
| Sum of electronic and zero-point Energies=   | -687.253122                 |
| Sum of electronic and thermal Energies=      | -687.239264                 |
| Sum of electronic and thermal Enthalpies=    | -687.238320                 |
| Sum of electronic and thermal Free Energies= | -687.293073                 |

SCF Done: E(RM06) = -687.242530171 A.U. after 17 cycles  
 NFock= 17 Conv=0.45D-08 -V/T= 2.0041

SMD-CDS (non-electrostatic) energy (kcal/mol) = 3.44  
 (included in total energy above)

### **INT-1**

|                                              |                             |
|----------------------------------------------|-----------------------------|
| Zero-point correction=                       | 0.360910 (Hartree/Particle) |
| Thermal correction to Energy=                | 0.385074                    |
| Thermal correction to Enthalpy=              | 0.386018                    |
| Thermal correction to Gibbs Free Energy=     | 0.307459                    |
| Sum of electronic and zero-point Energies=   | -1013.475833                |
| Sum of electronic and thermal Energies=      | -1013.451669                |
| Sum of electronic and thermal Enthalpies=    | -1013.450725                |
| Sum of electronic and thermal Free Energies= | -1013.529284                |

SCF Done: E(RM06) = -1014.50646657 A.U. after 19 cycles  
 NFock= 19 Conv=0.42D-08 -V/T= 2.0786  
 SMD-CDS (non-electrostatic) energy (kcal/mol) = 3.76  
 (included in total energy above)

### INT-2

|                                              |                             |
|----------------------------------------------|-----------------------------|
| Zero-point correction=                       | 0.452404 (Hartree/Particle) |
| Thermal correction to Energy=                | 0.484246                    |
| Thermal correction to Enthalpy=              | 0.485190                    |
| Thermal correction to Gibbs Free Energy=     | 0.389167                    |
| Sum of electronic and zero-point Energies=   | -1373.983709                |
| Sum of electronic and thermal Energies=      | -1373.951867                |
| Sum of electronic and thermal Enthalpies=    | -1373.950923                |
| Sum of electronic and thermal Free Energies= | -1374.046946                |

SCF Done: E(RM06) = -1375.00891857 A.U. after 18 cycles  
 NFock= 18 Conv=0.36D-08 -V/T= 2.0579  
 SMD-CDS (non-electrostatic) energy (kcal/mol) = 7.09  
 (included in total energy above)

### INT-3

|                                              |                             |
|----------------------------------------------|-----------------------------|
| Zero-point correction=                       | 0.450837 (Hartree/Particle) |
| Thermal correction to Energy=                | 0.483114                    |
| Thermal correction to Enthalpy=              | 0.484058                    |
| Thermal correction to Gibbs Free Energy=     | 0.387230                    |
| Sum of electronic and zero-point Energies=   | -1373.945270                |
| Sum of electronic and thermal Energies=      | -1373.912993                |
| Sum of electronic and thermal Enthalpies=    | -1373.912049                |
| Sum of electronic and thermal Free Energies= | -1374.008877                |

SCF Done: E(RM06) = -1374.99731117 A.U. after 23 cycles  
 NFock= 23 Conv=0.17D-08 -V/T= 2.0581  
 SMD-CDS (non-electrostatic) energy (kcal/mol) = 7.48  
 (included in total energy above)

#### INT-4

|                                              |                             |
|----------------------------------------------|-----------------------------|
| Zero-point correction=                       | 0.436055 (Hartree/Particle) |
| Thermal correction to Energy=                | 0.465667                    |
| Thermal correction to Enthalpy=              | 0.466611                    |
| Thermal correction to Gibbs Free Energy=     | 0.376647                    |
| Sum of electronic and zero-point Energies=   | -1185.403237                |
| Sum of electronic and thermal Energies=      | -1185.373625                |
| Sum of electronic and thermal Enthalpies=    | -1185.372681                |
| Sum of electronic and thermal Free Energies= | -1185.462644                |

SCF Done: E(RM06) = -1186.42611411 A.U. after 22 cycles  
NFock= 22 Conv=0.62D-08 -V/T= 2.0674

SMD-CDS (non-electrostatic) energy (kcal/mol) = 4.13  
(included in total energy above)

#### INT-5

|                                              |                             |
|----------------------------------------------|-----------------------------|
| Zero-point correction=                       | 0.439370 (Hartree/Particle) |
| Thermal correction to Energy=                | 0.467858                    |
| Thermal correction to Enthalpy=              | 0.468802                    |
| Thermal correction to Gibbs Free Energy=     | 0.381923                    |
| Sum of electronic and zero-point Energies=   | -1185.467882                |
| Sum of electronic and thermal Energies=      | -1185.439394                |
| Sum of electronic and thermal Enthalpies=    | -1185.438449                |
| Sum of electronic and thermal Free Energies= | -1185.525328                |

SCF Done: E(RM06) = -1186.50853215 A.U. after 18 cycles  
NFock= 18 Conv=0.88D-08 -V/T= 2.0672

SMD-CDS (non-electrostatic) energy (kcal/mol) = 2.95  
(included in total energy above)

#### INT-6

|                                              |                             |
|----------------------------------------------|-----------------------------|
| Zero-point correction=                       | 0.503515 (Hartree/Particle) |
| Thermal correction to Energy=                | 0.537978                    |
| Thermal correction to Enthalpy=              | 0.538922                    |
| Thermal correction to Gibbs Free Energy=     | 0.438737                    |
| Sum of electronic and zero-point Energies=   | -1414.517352                |
| Sum of electronic and thermal Energies=      | -1414.482890                |
| Sum of electronic and thermal Enthalpies=    | -1414.481946                |
| Sum of electronic and thermal Free Energies= | -1414.582130                |

SCF Done: E(RM06) = -1415.58786199 A.U. after 18 cycles  
NFock= 18 Conv=0.77D-08 -V/T= 2.0564

SMD-CDS (non-electrostatic) energy (kcal/mol) = 5.08  
(included in total energy above)

## INT-7

|                                              |                             |
|----------------------------------------------|-----------------------------|
| Zero-point correction=                       | 0.237700 (Hartree/Particle) |
| Thermal correction to Energy=                | 0.252893                    |
| Thermal correction to Enthalpy=              | 0.253837                    |
| Thermal correction to Gibbs Free Energy=     | 0.194694                    |
| Sum of electronic and zero-point Energies=   | -687.244126                 |
| Sum of electronic and thermal Energies=      | -687.228934                 |
| Sum of electronic and thermal Enthalpies=    | -687.227990                 |
| Sum of electronic and thermal Free Energies= | -687.287133                 |

SCF Done: E(RM06) = -687.221433371 A.U. after 18 cycles  
NFock= 18 Conv=0.19D-08 -V/T= 2.0040  
SMD-CDS (non-electrostatic) energy (kcal/mol) = 4.36  
(included in total energy above)

## TS-1

|                                              |                             |
|----------------------------------------------|-----------------------------|
| Zero-point correction=                       | 0.450783 (Hartree/Particle) |
| Thermal correction to Energy=                | 0.482196                    |
| Thermal correction to Enthalpy=              | 0.483140                    |
| Thermal correction to Gibbs Free Energy=     | 0.389227                    |
| Sum of electronic and zero-point Energies=   | -1373.945118                |
| Sum of electronic and thermal Energies=      | -1373.913705                |
| Sum of electronic and thermal Enthalpies=    | -1373.912761                |
| Sum of electronic and thermal Free Energies= | -1374.006674                |

SCF Done: E(RM06) = -1374.99684731 A.U. after 23 cycles  
NFock= 23 Conv=0.47D-08 -V/T= 2.0581  
SMD-CDS (non-electrostatic) energy (kcal/mol) = 7.53  
(included in total energy above)

## TS-2

|                                              |                             |
|----------------------------------------------|-----------------------------|
| Zero-point correction=                       | 0.447856 (Hartree/Particle) |
| Thermal correction to Energy=                | 0.480743                    |
| Thermal correction to Enthalpy=              | 0.481687                    |
| Thermal correction to Gibbs Free Energy=     | 0.382354                    |
| Sum of electronic and zero-point Energies=   | -1373.940332                |
| Sum of electronic and thermal Energies=      | -1373.907445                |
| Sum of electronic and thermal Enthalpies=    | -1373.906501                |
| Sum of electronic and thermal Free Energies= | -1374.005834                |

SCF Done: E(RM06) = -1374.96881771 A.U. after 24 cycles  
NFock= 24 Conv=0.14D-08 -V/T= 2.0581  
SMD-CDS (non-electrostatic) energy (kcal/mol) = 9.19

(included in total energy above)

### TS-3

|                                              |                             |
|----------------------------------------------|-----------------------------|
| Zero-point correction=                       | 0.435108 (Hartree/Particle) |
| Thermal correction to Energy=                | 0.464156                    |
| Thermal correction to Enthalpy=              | 0.465100                    |
| Thermal correction to Gibbs Free Energy=     | 0.377184                    |
| Sum of electronic and zero-point Energies=   | -1185.379420                |
| Sum of electronic and thermal Energies=      | -1185.350372                |
| Sum of electronic and thermal Enthalpies=    | -1185.349428                |
| Sum of electronic and thermal Free Energies= | -1185.437344                |

SCF Done: E(RM06) = -1186.40760142 A.U. after 23 cycles  
NFock= 23 Conv=0.82D-08 -V/T= 2.0673

SMD-CDS (non-electrostatic) energy (kcal/mol) = 3.89  
(included in total energy above)

### TS-4

|                                              |                             |
|----------------------------------------------|-----------------------------|
| Zero-point correction=                       | 0.498210 (Hartree/Particle) |
| Thermal correction to Energy=                | 0.532337                    |
| Thermal correction to Enthalpy=              | 0.533281                    |
| Thermal correction to Gibbs Free Energy=     | 0.433271                    |
| Sum of electronic and zero-point Energies=   | -1414.489765                |
| Sum of electronic and thermal Energies=      | -1414.455639                |
| Sum of electronic and thermal Enthalpies=    | -1414.454694                |
| Sum of electronic and thermal Free Energies= | -1414.554704                |

SCF Done: E(RM06) = -1415.54759044 A.U. after 18 cycles  
NFock= 18 Conv=0.74D-08 -V/T= 2.0563

SMD-CDS (non-electrostatic) energy (kcal/mol) = 5.59  
(included in total energy above)

### INT-2a

|                                              |                             |
|----------------------------------------------|-----------------------------|
| Zero-point correction=                       | 0.451827 (Hartree/Particle) |
| Thermal correction to Energy=                | 0.484228                    |
| Thermal correction to Enthalpy=              | 0.485172                    |
| Thermal correction to Gibbs Free Energy=     | 0.385388                    |
| Sum of electronic and zero-point Energies=   | -1373.982960                |
| Sum of electronic and thermal Energies=      | -1373.950559                |
| Sum of electronic and thermal Enthalpies=    | -1373.949615                |
| Sum of electronic and thermal Free Energies= | -1374.049399                |

SCF Done: E(RM06) = -1375.00103759 A.U. after 18 cycles  
NFock= 18 Conv=0.64D-08 -V/T= 2.0579

SMD-CDS (non-electrostatic) energy (kcal/mol) = 7.94  
(included in total energy above)

### INT-3a

Zero-point correction= 0.452367 (Hartree/Particle)  
Thermal correction to Energy= 0.483919  
Thermal correction to Enthalpy= 0.484864  
Thermal correction to Gibbs Free Energy= 0.391898  
Sum of electronic and zero-point Energies= -1373.973940  
Sum of electronic and thermal Energies= -1373.942387  
Sum of electronic and thermal Enthalpies= -1373.941443  
Sum of electronic and thermal Free Energies= -1374.034409

SCF Done: E(RM06) = -1375.01093627 A.U. after 20 cycles  
NFock= 20 Conv=0.39D-08 -V/T= 2.0580

SMD-CDS (non-electrostatic) energy (kcal/mol) = 6.05  
(included in total energy above)

### TS-1a

Zero-point correction= 0.449955 (Hartree/Particle)  
Thermal correction to Energy= 0.481643  
Thermal correction to Enthalpy= 0.482588  
Thermal correction to Gibbs Free Energy= 0.388107  
Sum of electronic and zero-point Energies= -1373.926857  
Sum of electronic and thermal Energies= -1373.895169  
Sum of electronic and thermal Enthalpies= -1373.894225  
Sum of electronic and thermal Free Energies= -1373.988706

SCF Done: E(RM06) = -1374.95236383 A.U. after 22 cycles  
NFock= 22 Conv=0.86D-08 -V/T= 2.0579

SMD-CDS (non-electrostatic) energy (kcal/mol) = 6.72  
(included in total energy above)

### INT-3b

Zero-point correction= 0.454642 (Hartree/Particle)  
Thermal correction to Energy= 0.484961  
Thermal correction to Enthalpy= 0.485906  
Thermal correction to Gibbs Free Energy= 0.396182  
Sum of electronic and zero-point Energies= -1373.941006  
Sum of electronic and thermal Energies= -1373.910687  
Sum of electronic and thermal Enthalpies= -1373.909743  
Sum of electronic and thermal Free Energies= -1373.999467

SCF Done: E(RM06) = -1374.97451040 A.U. after 19 cycles

NFock= 19 Conv=0.30D-08 -V/T= 2.0579  
SMD-CDS (non-electrostatic) energy (kcal/mol) = 6.64  
(included in total energy above)

### TS-1b

Zero-point correction= 0.451819 (Hartree/Particle)  
Thermal correction to Energy= 0.482059  
Thermal correction to Enthalpy= 0.483003  
Thermal correction to Gibbs Free Energy= 0.393893  
Sum of electronic and zero-point Energies= -1373.907357  
Sum of electronic and thermal Energies= -1373.877118  
Sum of electronic and thermal Enthalpies= -1373.876174  
Sum of electronic and thermal Free Energies= -1373.965283

SCF Done: E(RM06) = -1374.93399775 A.U. after 19 cycles  
NFock= 19 Conv=0.94D-08 -V/T= 2.0579  
SMD-CDS (non-electrostatic) energy (kcal/mol) = 6.49  
(included in total energy above)

### INT-6c

Zero-point correction= 0.504150 (Hartree/Particle)  
Thermal correction to Energy= 0.538492  
Thermal correction to Enthalpy= 0.539436  
Thermal correction to Gibbs Free Energy= 0.439140  
Sum of electronic and zero-point Energies= -1414.496073  
Sum of electronic and thermal Energies= -1414.461731  
Sum of electronic and thermal Enthalpies= -1414.460787  
Sum of electronic and thermal Free Energies= -1414.561083

SCF Done: E(RM06) = -1415.57009460 A.U. after 18 cycles  
NFock= 18 Conv=0.72D-08 -V/T= 2.0564  
SMD-CDS (non-electrostatic) energy (kcal/mol) = 5.18  
(included in total energy above)

### TS-4c

Zero-point correction= 0.500366 (Hartree/Particle)  
Thermal correction to Energy= 0.533459  
Thermal correction to Enthalpy= 0.534403  
Thermal correction to Gibbs Free Energy= 0.437747  
Sum of electronic and zero-point Energies= -1414.463367  
Sum of electronic and thermal Energies= -1414.430274  
Sum of electronic and thermal Enthalpies= -1414.429330  
Sum of electronic and thermal Free Energies= -1414.525986

SCF Done: E(RM06) = -1415.52540381 A.U. after 19 cycles  
NFock= 19 Conv=0.32D-08 -V/T= 2.0564  
SMD-CDS (non-electrostatic) energy (kcal/mol) = 5.51  
(included in total energy above)

### TS-5c

Zero-point correction= 0.495776 (Hartree/Particle)  
Thermal correction to Energy= 0.529943  
Thermal correction to Enthalpy= 0.530888  
Thermal correction to Gibbs Free Energy= 0.431033  
Sum of electronic and zero-point Energies= -1414.394138  
Sum of electronic and thermal Energies= -1414.359971  
Sum of electronic and thermal Enthalpies= -1414.359026  
Sum of electronic and thermal Free Energies= -1414.458881

SCF Done: E(RM06) = -1415.46078871 A.U. after 18 cycles  
NFock= 18 Conv=0.74D-08 -V/T= 2.0564  
SMD-CDS (non-electrostatic) energy (kcal/mol) = 5.17  
(included in total energy above)

### TS-6c

Zero-point correction= 0.503671 (Hartree/Particle)  
Thermal correction to Energy= 0.536563  
Thermal correction to Enthalpy= 0.537507  
Thermal correction to Gibbs Free Energy= 0.442878  
Sum of electronic and zero-point Energies= -1414.467368  
Sum of electronic and thermal Energies= -1414.434476  
Sum of electronic and thermal Enthalpies= -1414.433532  
Sum of electronic and thermal Free Energies= -1414.528161

SCF Done: E(RM06) = -1415.53728967 A.U. after 18 cycles  
NFock= 18 Conv=0.69D-08 -V/T= 2.0564  
SMD-CDS (non-electrostatic) energy (kcal/mol) = 4.61  
(included in total energy above)

### INT-6d

Zero-point correction= 0.437994 (Hartree/Particle)  
Thermal correction to Energy= 0.466813  
Thermal correction to Enthalpy= 0.467757  
Thermal correction to Gibbs Free Energy= 0.379796  
Sum of electronic and zero-point Energies= -1185.467873  
Sum of electronic and thermal Energies= -1185.439053  
Sum of electronic and thermal Enthalpies= -1185.438109  
Sum of electronic and thermal Free Energies= -1185.526071



SCF Done: E(RM06) = -1186.50280442 A.U. after 18 cycles  
 NFock= 18 Conv=0.67D-08 -V/T= 2.0672  
 SMD-CDS (non-electrostatic) energy (kcal/mol) = 2.76  
 (included in total energy above)

### INT-7d

Zero-point correction= 0.439219 (Hartree/Particle)  
 Thermal correction to Energy= 0.467215  
 Thermal correction to Enthalpy= 0.468159  
 Thermal correction to Gibbs Free Energy= 0.381772  
 Sum of electronic and zero-point Energies= -1185.447166  
 Sum of electronic and thermal Energies= -1185.419170  
 Sum of electronic and thermal Enthalpies= -1185.418226  
 Sum of electronic and thermal Free Energies= -1185.504613

SCF Done: E(RM06) = -1186.48148285 A.U. after 18 cycles  
 NFock= 18 Conv=0.72D-08 -V/T= 2.0672  
 SMD-CDS (non-electrostatic) energy (kcal/mol) = 2.74  
 (included in total energy above)

### INT-8d

Zero-point correction= 0.505411 (Hartree/Particle)  
 Thermal correction to Energy= 0.538681  
 Thermal correction to Enthalpy= 0.539625  
 Thermal correction to Gibbs Free Energy= 0.442845  
 Sum of electronic and zero-point Energies= -1414.514561  
 Sum of electronic and thermal Energies= -1414.481290  
 Sum of electronic and thermal Enthalpies= -1414.480346  
 Sum of electronic and thermal Free Energies= -1414.577127

SCF Done: E(RM06) = -1415.58025889 A.U. after 18 cycles  
 NFock= 18 Conv=0.51D-08 -V/T= 2.0564  
 SMD-CDS (non-electrostatic) energy (kcal/mol) = 5.29  
 (included in total energy above)

### TS-4d

Zero-point correction= 0.437543 (Hartree/Particle)  
 Thermal correction to Energy= 0.465970  
 Thermal correction to Enthalpy= 0.466914  
 Thermal correction to Gibbs Free Energy= 0.378939  
 Sum of electronic and zero-point Energies= -1185.451239  
 Sum of electronic and thermal Energies= -1185.422812  
 Sum of electronic and thermal Enthalpies= -1185.421868

Sum of electronic and thermal Free Energies= -1185.509843

SCF Done: E(RM06) = -1186.48948042 A.U. after 19 cycles  
NFock= 19 Conv=0.60D-08 -V/T= 2.0672

SMD-CDS (non-electrostatic) energy (kcal/mol) = 3.52  
(included in total energy above)

### TS-5d

Zero-point correction= 0.438307 (Hartree/Particle)  
Thermal correction to Energy= 0.465836  
Thermal correction to Enthalpy= 0.466780  
Thermal correction to Gibbs Free Energy= 0.382193  
Sum of electronic and zero-point Energies= -1185.444055  
Sum of electronic and thermal Energies= -1185.416525  
Sum of electronic and thermal Enthalpies= -1185.415581  
Sum of electronic and thermal Free Energies= -1185.500168

SCF Done: E(RM06) = -1186.47627529 A.U. after 18 cycles  
NFock= 18 Conv=0.66D-08 -V/T= 2.0672

SMD-CDS (non-electrostatic) energy (kcal/mol) = 2.37  
(included in total energy above)

### TS-6d

Zero-point correction= 0.499149 (Hartree/Particle)  
Thermal correction to Energy= 0.532135  
Thermal correction to Enthalpy= 0.533079  
Thermal correction to Gibbs Free Energy= 0.435582  
Sum of electronic and zero-point Energies= -1414.468207  
Sum of electronic and thermal Energies= -1414.435222  
Sum of electronic and thermal Enthalpies= -1414.434278  
Sum of electronic and thermal Free Energies= -1414.531775

SCF Done: E(RM06) = -1415.52799750 A.U. after 18 cycles  
NFock= 18 Conv=0.60D-08 -V/T= 2.0564

SMD-CDS (non-electrostatic) energy (kcal/mol) = 5.90  
(included in total energy above)

### Cartesian coordinates for all of the species:

#### 2a

|   |             |            |             |
|---|-------------|------------|-------------|
| C | -0.84891200 | 0.78967500 | 0.09190600  |
| H | -0.38349400 | 0.19684500 | -0.70447600 |
| H | -0.49966900 | 0.37892100 | 1.04676500  |
| N | -2.77041200 | 2.06870800 | -0.16672700 |

|   |             |             |             |
|---|-------------|-------------|-------------|
| O | -1.65097100 | 2.95948600  | -0.18532000 |
| C | -0.47321200 | 2.25908500  | -0.03547600 |
| O | 0.60097000  | 2.79377400  | -0.02008800 |
| C | -2.33987200 | 0.86765700  | -0.01431500 |
| C | -3.29184800 | -0.28244900 | 0.04193900  |
| H | -3.08013000 | -1.00126800 | -0.75924800 |
| H | -3.19719900 | -0.81880200 | 0.99418100  |
| H | -4.31928400 | 0.07443500  | -0.06380800 |

**CH<sub>3</sub>COOH**

|   |             |             |             |
|---|-------------|-------------|-------------|
| C | 0.69578900  | -2.04102800 | -0.00944700 |
| O | 1.90407800  | -2.10956900 | -0.00979500 |
| O | 0.03294500  | -0.85534600 | -0.00879200 |
| H | 0.72212500  | -0.16432800 | -0.00876800 |
| C | -0.26202200 | -3.20636200 | -0.00919700 |
| H | -0.90836700 | -3.16070500 | 0.87355400  |
| H | -0.91071700 | -3.15932900 | -0.89013000 |
| H | 0.30083900  | -4.13989100 | -0.01059500 |

**CO<sub>2</sub>**

|   |            |            |            |
|---|------------|------------|------------|
| C | 4.60923600 | 0.73712300 | 0.00000000 |
| O | 3.43965300 | 0.73712300 | 0.00000000 |
| O | 5.77881900 | 0.73712300 | 0.00000000 |

**Cp\*(OAc)<sub>2</sub>**

|    |             |             |             |
|----|-------------|-------------|-------------|
| Rh | 0.02853700  | 0.19160100  | -0.11016000 |
| C  | 1.11476900  | -1.26404900 | 1.11946200  |
| C  | 0.99748900  | -1.80515800 | -0.20687600 |
| C  | 1.62475400  | -0.88855100 | -1.11919200 |
| C  | 2.22325800  | 0.18816700  | -0.33366800 |
| C  | 1.90702600  | -0.04131400 | 1.03441900  |
| C  | -1.05228200 | 2.49254000  | -0.02735000 |
| O  | -0.46456500 | 2.09978400  | -1.08538300 |
| O  | -0.98528400 | 1.77089900  | 1.01969800  |
| C  | -1.85036600 | 3.77090000  | -0.02290700 |
| H  | -2.88262400 | 3.54102600  | -0.31191200 |
| H  | -1.86453400 | 4.20996200  | 0.97761200  |
| H  | -1.44199500 | 4.47975800  | -0.74733200 |
| O  | -1.88737300 | -0.27975800 | -0.72021300 |
| C  | -2.61574000 | -1.13178600 | -0.05316100 |
| O  | -2.24932100 | -1.82886500 | 0.89581700  |
| C  | -4.05557500 | -1.18935700 | -0.56123000 |
| H  | -4.58597300 | -0.28478600 | -0.24151800 |
| H  | -4.08270100 | -1.21488000 | -1.65474200 |

|   |             |             |             |
|---|-------------|-------------|-------------|
| H | -4.56327000 | -2.06354600 | -0.14804100 |
| C | 3.00451700  | 1.32863800  | -0.91290300 |
| H | 3.98199800  | 0.98078900  | -1.27209100 |
| H | 2.47500300  | 1.77891300  | -1.75831700 |
| H | 3.17858600  | 2.11476500  | -0.17436400 |
| C | 2.28235100  | 0.80977500  | 2.20945200  |
| H | 3.06801600  | 0.32084400  | 2.80014900  |
| H | 2.65427700  | 1.78872200  | 1.89814000  |
| H | 1.42154400  | 0.97314700  | 2.86455700  |
| C | 1.76400300  | -1.05014900 | -2.60240000 |
| H | 1.73993900  | -0.08166000 | -3.11061000 |
| H | 2.71847200  | -1.53483600 | -2.85071300 |
| H | 0.95881700  | -1.66320700 | -3.01488600 |
| C | 0.32688100  | -3.09641300 | -0.56015500 |
| H | 0.03657800  | -3.12200200 | -1.61373600 |
| H | 1.01736600  | -3.93226100 | -0.38159800 |
| H | -0.56976500 | -3.24018900 | 0.04562800  |
| C | 0.60502100  | -1.90400700 | 2.37358600  |
| H | -0.43343700 | -2.21412200 | 2.23281500  |
| H | 1.21302700  | -2.78177300 | 2.63287100  |
| H | 0.64358900  | -1.20894300 | 3.21654100  |

## PC

|   |             |             |             |
|---|-------------|-------------|-------------|
| C | -3.84917800 | -1.32566400 | -0.79680900 |
| C | -3.06853100 | -0.68945400 | 0.16452200  |
| C | -2.60991400 | 0.61885500  | -0.05935400 |
| C | -2.94704600 | 1.26871200  | -1.26275000 |
| C | -3.72984600 | 0.61445800  | -2.21878500 |
| C | -4.18956700 | -0.67913000 | -1.99175400 |
| H | -4.19957500 | -2.33735100 | -0.60886300 |
| H | -2.80777700 | -1.20076700 | 1.08855600  |
| H | -3.95256800 | 1.14591400  | -3.13850100 |
| H | -4.79876000 | -1.18461700 | -2.73473000 |
| C | -2.41161100 | 2.62362900  | -1.55373400 |
| O | -2.48947500 | 3.16068900  | -2.65502000 |
| N | -1.81803000 | 3.23593000  | -0.46906200 |
| O | -1.23039900 | 4.48532100  | -0.65641200 |
| C | -2.18697000 | 5.52853200  | -0.91652700 |
| H | -1.57870500 | 6.43255600  | -1.00042000 |
| H | -2.71318400 | 5.33695000  | -1.85284500 |
| H | -2.89697000 | 5.63898600  | -0.08852000 |
| N | -1.77220200 | 1.27353200  | 0.83621200  |
| C | -1.80957000 | 2.73958900  | 0.92416400  |
| C | -3.06360800 | 3.22604500  | 1.68541900  |

|   |             |            |            |
|---|-------------|------------|------------|
| H | -3.08734600 | 4.31873700 | 1.74481900 |
| H | -3.97304800 | 2.88290600 | 1.18254600 |
| H | -3.06284500 | 2.83394200 | 2.70983900 |
| C | -0.52745200 | 3.19250100 | 1.63324100 |
| H | 0.34993700  | 2.87403700 | 1.06547900 |
| H | -0.50239400 | 4.27686000 | 1.75005000 |
| H | -0.48967200 | 2.73671000 | 2.62960700 |
| H | -1.70037500 | 0.83393500 | 1.74640600 |

### INT-1

|    |             |             |             |
|----|-------------|-------------|-------------|
| Rh | -0.18071000 | 0.25154000  | 0.04186900  |
| C  | 1.01585800  | -1.32346900 | 1.12512300  |
| C  | 0.80875200  | -1.74689800 | -0.21088900 |
| C  | 1.38606200  | -0.73051200 | -1.07098800 |
| C  | 2.12214200  | 0.21934800  | -0.23983100 |
| C  | 1.85563200  | -0.11295400 | 1.09794100  |
| C  | 2.92751300  | 1.36959100  | -0.76940900 |
| H  | 3.71979600  | 1.01542200  | -1.44082800 |
| H  | 2.29581800  | 2.07278100  | -1.32258700 |
| H  | 3.40515600  | 1.92627600  | 0.04127000  |
| C  | 2.33321900  | 0.59757500  | 2.32834000  |
| H  | 3.14071300  | 0.03211200  | 2.81372500  |
| H  | 2.71245300  | 1.59624800  | 2.09852900  |
| H  | 1.52729100  | 0.70578600  | 3.06151500  |
| C  | 1.43828000  | -0.77265300 | -2.56709700 |
| H  | 1.46861300  | 0.23552000  | -2.99008500 |
| H  | 2.34162900  | -1.30378900 | -2.90135700 |
| H  | 0.57147100  | -1.29156000 | -2.98461000 |
| C  | 0.17332500  | -3.01988100 | -0.68575700 |
| H  | -0.50571000 | -2.84692300 | -1.52567200 |
| H  | 0.94421200  | -3.72849500 | -1.01823900 |
| H  | -0.39696900 | -3.50762700 | 0.10890500  |
| C  | 0.60938800  | -2.04227700 | 2.37717200  |
| H  | -0.23127100 | -2.71777300 | 2.19877400  |
| H  | 1.44238800  | -2.64113500 | 2.77191000  |
| H  | 0.30891300  | -1.34070700 | 3.16151200  |
| C  | -4.25669800 | -1.42255000 | -0.30939400 |
| C  | -2.87023900 | -1.35851500 | -0.09800800 |
| C  | -2.18248200 | -0.15141300 | -0.25364900 |
| C  | -2.92798900 | 0.98274800  | -0.61738200 |
| C  | -4.30350600 | 0.93251600  | -0.83183100 |
| C  | -4.97414000 | -0.28429700 | -0.68034900 |
| H  | -4.77506200 | -2.37086000 | -0.18235800 |
| H  | -2.34821000 | -2.26607100 | 0.19351600  |

|   |             |             |             |
|---|-------------|-------------|-------------|
| H | -4.82635400 | 1.84254900  | -1.11442500 |
| H | -6.04652300 | -0.34335600 | -0.84713000 |
| C | -2.17065800 | 2.26387600  | -0.75335600 |
| O | -2.63043700 | 3.33085400  | -1.13542300 |
| N | -0.84912900 | 2.05871500  | -0.34802800 |
| O | 0.01744400  | 3.12562700  | -0.63389300 |
| C | -0.01903500 | 4.10562600  | 0.40389500  |
| H | 0.71734200  | 4.86155300  | 0.11615400  |
| H | -1.01128100 | 4.56135400  | 0.47175400  |
| H | 0.26124300  | 3.66190100  | 1.36928100  |

## INT-2

|    |             |             |             |
|----|-------------|-------------|-------------|
| Rh | -0.69257800 | 0.48267700  | -0.00373200 |
| C  | 0.27450700  | -1.54858600 | 0.17429700  |
| C  | 0.08098900  | -1.27884100 | -1.23354300 |
| C  | 0.92857200  | -0.17911800 | -1.57437000 |
| C  | 1.68901400  | 0.20622100  | -0.39952300 |
| C  | 1.29400200  | -0.63859200 | 0.67036200  |
| C  | 2.74283000  | 1.26904000  | -0.33459200 |
| H  | 3.74107800  | 0.81875500  | -0.43453100 |
| H  | 2.62447600  | 1.99234000  | -1.14507100 |
| H  | 2.69475400  | 1.80351900  | 0.61806800  |
| C  | 1.87434800  | -0.61609000 | 2.05048900  |
| H  | 2.87382800  | -1.07205500 | 2.04021800  |
| H  | 1.96682900  | 0.41521600  | 2.40943700  |
| H  | 1.26317000  | -1.18435600 | 2.75739200  |
| C  | 1.12114100  | 0.39945300  | -2.94183100 |
| H  | 1.14928600  | 1.49034300  | -2.90649700 |
| H  | 2.07428800  | 0.04429900  | -3.35678700 |
| H  | 0.32577300  | 0.10064600  | -3.62822700 |
| C  | -0.74667500 | -2.09791200 | -2.17966100 |
| H  | -1.07152200 | -1.51140700 | -3.04257200 |
| H  | -0.16179200 | -2.94953900 | -2.55287900 |
| H  | -1.64355900 | -2.49037600 | -1.69444100 |
| C  | -0.29102100 | -2.71960700 | 0.92125500  |
| H  | -1.27753000 | -3.00172900 | 0.54499000  |
| H  | 0.36725900  | -3.59206500 | 0.80407500  |
| H  | -0.37725100 | -2.51618600 | 1.99186400  |
| C  | -4.73987400 | -1.08905900 | -0.52281200 |
| C  | -3.45600100 | -0.89578100 | 0.00771400  |
| C  | -2.63519100 | 0.08664200  | -0.54100800 |
| C  | -3.09981600 | 0.88120000  | -1.59051300 |
| C  | -4.37398800 | 0.67893600  | -2.12887200 |
| C  | -5.19462500 | -0.31273400 | -1.59356100 |

|   |             |             |             |
|---|-------------|-------------|-------------|
| H | -5.38758200 | -1.84774400 | -0.08968400 |
| H | -3.12579100 | -1.50238200 | 0.84637600  |
| H | -4.69484300 | 1.30748100  | -2.95515500 |
| H | -6.18900900 | -0.47653600 | -1.99939900 |
| C | -2.20251100 | 1.96188400  | -2.09268000 |
| O | -2.40453900 | 2.66448800  | -3.07200900 |
| N | -1.13641500 | 2.08491900  | -1.20990900 |
| O | -0.12906700 | 2.93683700  | -1.60023000 |
| C | 0.09490700  | 3.96048100  | -0.61247200 |
| H | 0.86840200  | 4.59895000  | -1.04580900 |
| H | -0.82322500 | 4.53692500  | -0.45994200 |
| H | 0.44984100  | 3.52658200  | 0.32970400  |
| N | -1.21074500 | 1.17284500  | 1.65771100  |
| O | 1.38827500  | 2.51601100  | 2.32840700  |
| C | 0.79459900  | 2.95888300  | 3.34189000  |
| O | 1.18889100  | 3.41826300  | 4.41768900  |
| C | -1.27393300 | 1.57108300  | 2.84313300  |
| C | -1.73149100 | 0.66809000  | 3.97637300  |
| H | -0.96239200 | 0.67643900  | 4.75690200  |
| H | -2.65625700 | 1.06346400  | 4.41040900  |
| H | -1.90317600 | -0.35372300 | 3.63209500  |
| C | -0.81330000 | 2.96610200  | 3.20048100  |
| H | -1.28751800 | 3.28715500  | 4.13108100  |
| H | -1.05338900 | 3.66820200  | 2.39763200  |

### INT-3

|    |             |             |             |
|----|-------------|-------------|-------------|
| Rh | -0.69257800 | 0.48267700  | -0.00373200 |
| C  | 0.27450700  | -1.54858600 | 0.17429700  |
| C  | 0.08098900  | -1.27884100 | -1.23354300 |
| C  | 0.92857200  | -0.17911800 | -1.57437000 |
| C  | 1.68901400  | 0.20622100  | -0.39952300 |
| C  | 1.29400200  | -0.63859200 | 0.67036200  |
| C  | 2.74283000  | 1.26904000  | -0.33459200 |
| H  | 3.74107800  | 0.81875500  | -0.43453100 |
| H  | 2.62447600  | 1.99234000  | -1.14507100 |
| H  | 2.69475400  | 1.80351900  | 0.61806800  |
| C  | 1.87434800  | -0.61609000 | 2.05048900  |
| H  | 2.87382800  | -1.07205500 | 2.04021800  |
| H  | 1.96682900  | 0.41521600  | 2.40943700  |
| H  | 1.26317000  | -1.18435600 | 2.75739200  |
| C  | 1.12114100  | 0.39945300  | -2.94183100 |
| H  | 1.14928600  | 1.49034300  | -2.90649700 |
| H  | 2.07428800  | 0.04429900  | -3.35678700 |
| H  | 0.32577300  | 0.10064600  | -3.62822700 |

|   |             |             |             |
|---|-------------|-------------|-------------|
| C | -0.74667500 | -2.09791200 | -2.17966100 |
| H | -1.07152200 | -1.51140700 | -3.04257200 |
| H | -0.16179200 | -2.94953900 | -2.55287900 |
| H | -1.64355900 | -2.49037600 | -1.69444100 |
| C | -0.29102100 | -2.71960700 | 0.92125500  |
| H | -1.27753000 | -3.00172900 | 0.54499000  |
| H | 0.36725900  | -3.59206500 | 0.80407500  |
| H | -0.37725100 | -2.51618600 | 1.99186400  |
| C | -4.73987400 | -1.08905900 | -0.52281200 |
| C | -3.45600100 | -0.89578100 | 0.00771400  |
| C | -2.63519100 | 0.08664200  | -0.54100800 |
| C | -3.09981600 | 0.88120000  | -1.59051300 |
| C | -4.37398800 | 0.67893600  | -2.12887200 |
| C | -5.19462500 | -0.31273400 | -1.59356100 |
| H | -5.38758200 | -1.84774400 | -0.08968400 |
| H | -3.12579100 | -1.50238200 | 0.84637600  |
| H | -4.69484300 | 1.30748100  | -2.95515500 |
| H | -6.18900900 | -0.47653600 | -1.99939900 |
| C | -2.20251100 | 1.96188400  | -2.09268000 |
| O | -2.40453900 | 2.66448800  | -3.07200900 |
| N | -1.13641500 | 2.08491900  | -1.20990900 |
| O | -0.12906700 | 2.93683700  | -1.60023000 |
| C | 0.09490700  | 3.96048100  | -0.61247200 |
| H | 0.86840200  | 4.59895000  | -1.04580900 |
| H | -0.82322500 | 4.53692500  | -0.45994200 |
| H | 0.44984100  | 3.52658200  | 0.32970400  |
| N | -1.21074500 | 1.17284500  | 1.65771100  |
| O | 1.38827500  | 2.51601100  | 2.32840700  |
| C | 0.79459900  | 2.95888300  | 3.34189000  |
| O | 1.18889100  | 3.41826300  | 4.41768900  |
| C | -1.27393300 | 1.57108300  | 2.84313300  |
| C | -1.73149100 | 0.66809000  | 3.97637300  |
| H | -0.96239200 | 0.67643900  | 4.75690200  |
| H | -2.65625700 | 1.06346400  | 4.41040900  |
| H | -1.90317600 | -0.35372300 | 3.63209500  |
| C | -0.81330000 | 2.96610200  | 3.20048100  |
| H | -1.28751800 | 3.28715500  | 4.13108100  |
| H | -1.05338900 | 3.66820200  | 2.39763200  |

**INT-4**

|    |             |             |             |
|----|-------------|-------------|-------------|
| Rh | -0.28464900 | 0.63755000  | -0.03454000 |
| C  | 0.57830900  | -1.44995500 | 0.34869400  |
| C  | 0.22076700  | -1.44517500 | -1.06256300 |
| C  | 1.07407400  | -0.52522100 | -1.71059900 |



|   |             |             |             |
|---|-------------|-------------|-------------|
| C | 2.00751800  | 0.00797100  | -0.72992400 |
| C | 1.73366400  | -0.59823500 | 0.51897900  |
| C | 3.09799900  | 0.98552200  | -1.05602700 |
| H | 3.87625900  | 0.51505200  | -1.67279400 |
| H | 2.69849300  | 1.83352500  | -1.62073800 |
| H | 3.57691400  | 1.37435300  | -0.15351500 |
| C | 2.40843900  | -0.33418600 | 1.82827500  |
| H | 3.36288300  | 0.18193700  | 1.69261000  |
| H | 1.76344000  | 0.30204200  | 2.45405800  |
| H | 2.60453700  | -1.26471500 | 2.37331300  |
| C | 1.09367600  | -0.17700400 | -3.16975500 |
| H | 1.18965500  | 0.90252100  | -3.31580600 |
| H | 1.94339200  | -0.66157600 | -3.67068600 |
| H | 0.18117800  | -0.50192300 | -3.67610500 |
| C | -0.80095900 | -2.33994800 | -1.70034800 |
| H | -1.12440000 | -1.95370500 | -2.67060100 |
| H | -0.38640400 | -3.34463700 | -1.86310400 |
| H | -1.69306000 | -2.44482500 | -1.07605200 |
| C | 0.04699400  | -2.40163600 | 1.38124500  |
| H | -0.99199500 | -2.67697500 | 1.17980900  |
| H | 0.63409400  | -3.33172100 | 1.38875800  |
| H | 0.09618300  | -1.97056700 | 2.38528500  |
| C | -4.46789900 | -0.58179300 | 0.21726400  |
| C | -3.10380100 | -0.47855700 | 0.52038700  |
| C | -2.29368400 | 0.38608400  | -0.21958600 |
| C | -2.86487400 | 1.14730800  | -1.25014400 |
| C | -4.22477800 | 1.04139200  | -1.55542900 |
| C | -5.02794000 | 0.16951900  | -0.82174300 |
| H | -5.09646100 | -1.25091900 | 0.80095800  |
| H | -2.69330900 | -1.06263600 | 1.34009000  |
| H | -4.62401500 | 1.64708400  | -2.36477000 |
| H | -6.08642500 | 0.07766300  | -1.05018700 |
| C | -1.97613900 | 2.09999800  | -1.97937600 |
| O | -2.30555800 | 2.82124800  | -2.91530100 |
| N | -0.73475400 | 2.07607300  | -1.37216700 |
| O | 0.26441700  | 2.83984600  | -1.97079400 |
| C | 0.32851300  | 4.13845500  | -1.37358000 |
| H | 1.16839200  | 4.64286000  | -1.85924900 |
| H | -0.59760500 | 4.69055800  | -1.56457200 |
| H | 0.51006900  | 4.05958900  | -0.29462800 |
| N | -0.31430100 | 1.42383900  | 1.65550200  |
| C | -1.27386900 | 2.13096600  | 2.31819100  |
| C | -1.21996500 | 2.00129900  | 3.83270800  |
| H | -1.96927900 | 2.63681500  | 4.31480800  |

|   |             |            |            |
|---|-------------|------------|------------|
| H | -1.40886700 | 0.96317500 | 4.12996100 |
| H | -0.22693700 | 2.27224800 | 4.20733500 |
| C | -2.12377200 | 3.00671900 | 1.70823000 |
| H | -2.72876000 | 3.69295800 | 2.29422100 |
| H | -2.15357800 | 3.09812900 | 0.63083500 |

### INT-5

|    |             |             |             |
|----|-------------|-------------|-------------|
| Rh | -0.05953000 | 0.95506200  | -0.65867400 |
| C  | 1.79072200  | -0.06676000 | 0.30705500  |
| C  | 1.30079800  | -0.80733700 | -0.81723300 |
| C  | 1.43623200  | 0.02269100  | -2.00456300 |
| C  | 1.97701800  | 1.27815000  | -1.59439700 |
| C  | 2.15841700  | 1.23736400  | -0.16280800 |
| C  | 2.40763000  | 2.40041900  | -2.48899800 |
| H  | 3.49215200  | 2.35078700  | -2.66040900 |
| H  | 1.90626100  | 2.34853100  | -3.45551300 |
| H  | 2.18758200  | 3.37800400  | -2.04979300 |
| C  | 2.75544800  | 2.33983600  | 0.65782800  |
| H  | 2.46461800  | 3.32332900  | 0.27837900  |
| H  | 2.45079300  | 2.27820700  | 1.70588400  |
| H  | 3.85322800  | 2.28625600  | 0.62907000  |
| C  | 1.13002500  | -0.38478800 | -3.41456500 |
| H  | 0.65548900  | 0.43670800  | -3.95777300 |
| H  | 2.04986600  | -0.66875900 | -3.94435900 |
| H  | 0.45122900  | -1.24129000 | -3.44509700 |
| C  | 0.85134300  | -2.23594100 | -0.78867600 |
| H  | 0.14914500  | -2.45412600 | -1.59778600 |
| H  | 1.71176900  | -2.91058400 | -0.90393700 |
| H  | 0.36228400  | -2.47802100 | 0.15872900  |
| C  | 2.02392100  | -0.61370200 | 1.68259300  |
| H  | 1.21359700  | -1.27486200 | 1.99872200  |
| H  | 2.95863600  | -1.19091100 | 1.70381200  |
| H  | 2.11394000  | 0.18147700  | 2.42752000  |
| C  | -5.20240000 | 1.33732100  | 1.37025600  |
| C  | -3.86748100 | 1.00573800  | 1.51175500  |
| C  | -2.92690300 | 1.17329100  | 0.45122200  |
| C  | -3.42450500 | 1.71185100  | -0.77207700 |
| C  | -4.79258000 | 2.02153100  | -0.88712100 |
| C  | -5.68412500 | 1.84947100  | 0.15799300  |
| H  | -5.87672800 | 1.18758900  | 2.21028900  |
| H  | -3.53276200 | 0.57989700  | 2.44876300  |
| H  | -5.11685900 | 2.41034700  | -1.84591300 |
| H  | -6.73257100 | 2.10691200  | 0.03887400  |
| C  | -2.63693600 | 2.00492200  | -1.99765800 |

|   |             |             |             |
|---|-------------|-------------|-------------|
| O | -3.19004800 | 2.33832000  | -3.05160100 |
| N | -1.26044600 | 1.98164000  | -1.86435000 |
| O | -0.61152300 | 2.36310700  | -3.06187300 |
| C | -0.69624500 | 3.77555400  | -3.26830500 |
| H | -0.09026700 | 3.97122700  | -4.15788300 |
| H | -1.73019800 | 4.07771400  | -3.44695300 |
| H | -0.27906600 | 4.31714000  | -2.40856600 |
| N | -1.60525000 | 0.80053100  | 0.62403100  |
| C | -1.25763600 | 0.24466500  | 1.89573400  |
| C | -0.77604700 | 1.24238200  | 2.92315200  |
| H | 0.08734100  | 1.80293900  | 2.54699400  |
| H | -1.56250300 | 1.97949800  | 3.12873000  |
| H | -0.50154500 | 0.75475000  | 3.86395500  |
| C | -1.38222100 | -1.06560400 | 2.14827300  |
| H | -1.11923800 | -1.47984800 | 3.11782600  |
| H | -1.77794600 | -1.74669500 | 1.40092000  |

#### INT-6

|    |             |             |             |
|----|-------------|-------------|-------------|
| Rh | 0.01642300  | 1.22658600  | -1.04040200 |
| C  | 1.20818500  | -0.73492500 | -1.23969000 |
| C  | -0.16096900 | -0.99338300 | -1.54507400 |
| C  | -0.55614000 | -0.16970400 | -2.66392700 |
| C  | 0.61655700  | 0.56374300  | -3.09513300 |
| C  | 1.68545400  | 0.24599700  | -2.20175800 |
| C  | 0.69682600  | 1.44924000  | -4.30093600 |
| H  | 0.95697300  | 0.85073600  | -5.18541400 |
| H  | -0.25319000 | 1.95153300  | -4.49424100 |
| H  | 1.45328600  | 2.22621100  | -4.17772700 |
| C  | 3.09912600  | 0.73071400  | -2.30413000 |
| H  | 3.15572200  | 1.68740000  | -2.83004400 |
| H  | 3.53797400  | 0.85251100  | -1.31194700 |
| H  | 3.70135500  | 0.00355200  | -2.86731600 |
| C  | -1.86737000 | -0.22822200 | -3.39108100 |
| H  | -2.11049800 | 0.73246000  | -3.85234800 |
| H  | -1.83086900 | -0.98217400 | -4.19000700 |
| H  | -2.69163700 | -0.49125100 | -2.72293000 |
| C  | -1.05330300 | -1.97517000 | -0.84733100 |
| H  | -2.08372500 | -1.61303000 | -0.79219500 |
| H  | -1.06683400 | -2.92635300 | -1.39655100 |
| H  | -0.70765300 | -2.18426100 | 0.16845000  |
| C  | 2.06498000  | -1.45798200 | -0.24373100 |
| H  | 1.45917700  | -1.98153100 | 0.50217500  |
| H  | 2.68459700  | -2.21149500 | -0.75056200 |
| H  | 2.71373300  | -0.75218300 | 0.27700600  |

|   |             |             |             |
|---|-------------|-------------|-------------|
| C | -5.07052300 | 0.39854900  | -0.27955400 |
| C | -3.79596400 | 0.43201000  | 0.28355500  |
| C | -2.84009000 | 1.36473400  | -0.15213100 |
| C | -3.15151500 | 2.24911500  | -1.20243600 |
| C | -4.45163000 | 2.22448400  | -1.72516300 |
| C | -5.40566400 | 1.31233100  | -1.28011800 |
| H | -5.79492200 | -0.33231100 | 0.06946100  |
| H | -3.52836900 | -0.26916100 | 1.06891200  |
| H | -4.67857200 | 2.95115300  | -2.49809800 |
| H | -6.40067000 | 1.30863600  | -1.71628200 |
| C | -2.20902300 | 3.24547600  | -1.84738800 |
| O | -2.67977000 | 4.20755100  | -2.47022900 |
| N | -0.89554800 | 2.96955900  | -1.70149700 |
| O | -0.04365200 | 3.82306500  | -2.41738100 |
| C | 0.13779700  | 5.07078200  | -1.73775400 |
| H | 0.88137700  | 5.61153400  | -2.33183100 |
| H | -0.80141700 | 5.63228100  | -1.72107400 |
| H | 0.51484400  | 4.89490200  | -0.72747100 |
| N | -1.53980700 | 1.33851500  | 0.45022200  |
| C | -1.40538600 | 1.47410900  | 1.72929700  |
| C | -2.52372100 | 1.90988900  | 2.65161300  |
| H | -2.11919200 | 2.63965500  | 3.36239500  |
| H | -3.36691700 | 2.35287400  | 2.12153900  |
| H | -2.89133100 | 1.06384200  | 3.24549800  |
| C | -0.10203100 | 1.20623300  | 2.42005900  |
| H | -0.29354300 | 0.55573600  | 3.28453300  |
| H | 0.31001200  | 2.14167400  | 2.81564700  |
| C | 2.26277000  | 2.45553000  | 0.67088800  |
| O | 1.11847200  | 2.65521400  | 0.09886800  |
| O | 2.82963500  | 1.36830600  | 0.84285100  |
| H | 0.64505000  | 0.75366500  | 1.77060200  |
| C | 2.91825300  | 3.74875000  | 1.16449400  |
| H | 3.75116300  | 3.51846900  | 1.83249000  |
| H | 3.29670300  | 4.31482300  | 0.30501900  |
| H | 2.18944700  | 4.38600200  | 1.67542000  |

#### INT-7

|   |             |            |             |
|---|-------------|------------|-------------|
| C | -5.62445200 | 0.74479000 | -0.92875100 |
| C | -4.48438300 | 0.87144700 | -0.14017500 |
| C | -3.42935200 | 1.72305800 | -0.51434000 |
| C | -3.52181500 | 2.43265800 | -1.73861300 |
| C | -4.69000700 | 2.30401400 | -2.50396600 |
| C | -5.73577100 | 1.47391500 | -2.11414300 |
| H | -6.42210600 | 0.07620800 | -0.61557900 |

|   |             |            |             |
|---|-------------|------------|-------------|
| H | -4.38305300 | 0.28909800 | 0.77088500  |
| H | -4.73647800 | 2.87217800 | -3.42666200 |
| H | -6.62272900 | 1.38558000 | -2.73469600 |
| C | -2.46313800 | 3.32190700 | -2.35282400 |
| O | -2.65619000 | 3.90699400 | -3.41151300 |
| O | -0.17978000 | 3.93305600 | -2.34389300 |
| C | -0.10983800 | 5.35817600 | -2.29497800 |
| H | 0.81557500  | 5.61262300 | -2.81893000 |
| H | -0.96407000 | 5.80682000 | -2.81066700 |
| H | -0.06174800 | 5.71740200 | -1.25875600 |
| N | -2.25401200 | 1.76636400 | 0.26411200  |
| C | -2.23566100 | 2.06997000 | 1.51011700  |
| C | -3.41052700 | 2.53918000 | 2.34148100  |
| H | -3.12094000 | 3.42967000 | 2.91233000  |
| H | -4.28690500 | 2.77092700 | 1.73430600  |
| H | -3.69026500 | 1.77353200 | 3.07679500  |
| C | -0.91382100 | 1.99500000 | 2.23410400  |
| H | -0.99538000 | 1.35055200 | 3.11905600  |
| H | -0.61660100 | 2.98860400 | 2.59466400  |
| H | -0.13506400 | 1.60263500 | 1.57686900  |
| N | -1.29758900 | 3.47752300 | -1.63048800 |
| H | -1.04224800 | 2.73755100 | -0.97790000 |

### TS-1

|    |             |             |             |
|----|-------------|-------------|-------------|
| Rh | -0.61602500 | 0.47363000  | 0.00234100  |
| C  | 0.32001200  | -1.59307300 | 0.12855800  |
| C  | 0.10556800  | -1.28418000 | -1.27020600 |
| C  | 0.95885900  | -0.18427800 | -1.60258700 |
| C  | 1.71688200  | 0.18280500  | -0.42650500 |
| C  | 1.32563400  | -0.68699400 | 0.63734300  |
| C  | 2.76632000  | 1.24790500  | -0.34059900 |
| H  | 3.76662800  | 0.79872200  | -0.42465500 |
| H  | 2.66036400  | 1.97316900  | -1.15101300 |
| H  | 2.70150600  | 1.77856000  | 0.61328900  |
| C  | 1.91001000  | -0.67577200 | 2.01636500  |
| H  | 2.91883200  | -1.10998500 | 1.99744800  |
| H  | 1.98090500  | 0.35146800  | 2.39097200  |
| H  | 1.31058800  | -1.26640700 | 2.71487600  |
| C  | 1.13517100  | 0.42529700  | -2.95912000 |
| H  | 1.14835900  | 1.51567800  | -2.89924300 |
| H  | 2.08835100  | 0.09160200  | -3.39087500 |
| H  | 0.33654700  | 0.13302000  | -3.64454000 |
| C  | -0.73467300 | -2.08065700 | -2.22430500 |
| H  | -1.06714000 | -1.47505500 | -3.07097200 |

|   |             |             |             |
|---|-------------|-------------|-------------|
| H | -0.15591000 | -2.92534300 | -2.62202800 |
| H | -1.62694000 | -2.48194800 | -1.73779600 |
| C | -0.24257700 | -2.77902200 | 0.85317800  |
| H | -1.23138200 | -3.05156900 | 0.47629900  |
| H | 0.41330200  | -3.64965800 | 0.71239400  |
| H | -0.32188900 | -2.59990400 | 1.92873800  |
| C | -4.66560100 | -1.14312300 | -0.38835300 |
| C | -3.36477600 | -0.93955700 | 0.09477000  |
| C | -2.57595000 | 0.05745700  | -0.47543900 |
| C | -3.08748700 | 0.85352300  | -1.50095800 |
| C | -4.37768200 | 0.63964000  | -1.99460400 |
| C | -5.16760800 | -0.36419400 | -1.43594500 |
| H | -5.28862600 | -1.91220400 | 0.06232800  |
| H | -2.99464700 | -1.55090100 | 0.91315000  |
| H | -4.73450300 | 1.26852400  | -2.80574900 |
| H | -6.17426900 | -0.53657100 | -1.80653000 |
| C | -2.21822900 | 1.94595800  | -2.02913100 |
| O | -2.45088700 | 2.63223800  | -3.01380500 |
| N | -1.14626200 | 2.09983900  | -1.16157600 |
| O | -0.14725100 | 2.94599300  | -1.58930900 |
| C | 0.10298800  | 3.97477500  | -0.61451600 |
| H | 0.87727100  | 4.60169800  | -1.06328000 |
| H | -0.80639100 | 4.56259300  | -0.45233200 |
| H | 0.46508300  | 3.54375500  | 0.32629800  |
| N | -1.05446700 | 1.25583500  | 1.64427800  |
| O | 1.38423300  | 2.47774600  | 2.31531900  |
| C | 0.85244100  | 2.93094900  | 3.36231800  |
| O | 1.31346100  | 3.37985800  | 4.41450600  |
| C | -1.31084200 | 1.67542600  | 2.79463100  |
| C | -2.13536400 | 0.84394100  | 3.76783500  |
| H | -1.54580000 | 0.68532300  | 4.67792400  |
| H | -3.03967100 | 1.39690800  | 4.04302000  |
| H | -2.41872700 | -0.11743300 | 3.33560800  |
| C | -0.75136800 | 2.99260700  | 3.28811200  |
| H | -1.18423700 | 3.24464000  | 4.25856500  |
| H | -0.98668200 | 3.78619800  | 2.57124000  |

**TS-2**

|    |             |             |             |
|----|-------------|-------------|-------------|
| Rh | -0.39347600 | 0.51814400  | -0.13729000 |
| C  | 0.59933300  | -1.51556400 | 0.23340800  |
| C  | 0.17358300  | -1.45493400 | -1.14958600 |
| C  | 0.95514200  | -0.44266400 | -1.79455800 |
| C  | 1.90252700  | 0.07967100  | -0.83672200 |
| C  | 1.69403200  | -0.58875200 | 0.40411200  |

|   |             |             |             |
|---|-------------|-------------|-------------|
| C | 2.93012000  | 1.12735400  | -1.14440100 |
| H | 3.69874400  | 0.72956400  | -1.82063700 |
| H | 2.46614400  | 1.98820000  | -1.63488900 |
| H | 3.42943500  | 1.48088400  | -0.23919800 |
| C | 2.43436600  | -0.36801700 | 1.68804000  |
| H | 3.35894800  | 0.19072800  | 1.52237500  |
| H | 1.83387500  | 0.19609600  | 2.41416500  |
| H | 2.70083200  | -1.32550200 | 2.15047100  |
| C | 0.89372000  | -0.05296000 | -3.24055800 |
| H | 1.05983400  | 1.01977200  | -3.36670300 |
| H | 1.66686900  | -0.58659700 | -3.81061200 |
| H | -0.07537200 | -0.29623300 | -3.68282600 |
| C | -0.77588800 | -2.39987600 | -1.82168800 |
| H | -1.24796700 | -1.94478100 | -2.69590000 |
| H | -0.23397400 | -3.29404400 | -2.15971100 |
| H | -1.57240500 | -2.72699800 | -1.14933600 |
| C | 0.16738900  | -2.53028100 | 1.25207800  |
| H | -0.85670800 | -2.87146300 | 1.07831000  |
| H | 0.81656400  | -3.41634000 | 1.20654500  |
| H | 0.22718100  | -2.12969600 | 2.26768500  |
| C | -4.55161600 | -0.85983100 | -0.23883900 |
| C | -3.18887900 | -0.79101500 | 0.08365800  |
| C | -2.40564600 | 0.23772000  | -0.43899800 |
| C | -2.99583100 | 1.19232600  | -1.27306900 |
| C | -4.35526500 | 1.13007400  | -1.59094600 |
| C | -5.13578300 | 0.09724000  | -1.07398800 |
| H | -5.15767300 | -1.66362600 | 0.17275400  |
| H | -2.76272200 | -1.53766000 | 0.74811000  |
| H | -4.77139600 | 1.89786000  | -2.23771500 |
| H | -6.19357700 | 0.03741500  | -1.31469000 |
| C | -2.12870400 | 2.28673600  | -1.79495700 |
| O | -2.49978900 | 3.24704400  | -2.46148000 |
| N | -0.83551800 | 2.04702000  | -1.38397200 |
| O | 0.13579500  | 2.97759200  | -1.71560500 |
| C | 0.05807300  | 4.14551900  | -0.88093900 |
| H | 0.90783300  | 4.76680400  | -1.17436800 |
| H | -0.88071900 | 4.67391400  | -1.06714800 |
| H | 0.14238000  | 3.86740600  | 0.17638100  |
| N | -0.63097500 | 1.21026900  | 1.60082700  |
| O | 1.15097300  | 1.44277300  | 4.38917900  |
| C | 0.07681600  | 1.80899200  | 4.81404500  |
| O | -0.64124600 | 1.85525100  | 5.78892700  |
| C | -1.33580200 | 1.54655200  | 2.62060500  |
| C | -2.54764500 | 0.77020600  | 3.10599300  |

|   |             |             |            |
|---|-------------|-------------|------------|
| H | -2.65780000 | 0.91414000  | 4.18380600 |
| H | -3.44625500 | 1.13154900  | 2.59438800 |
| H | -2.44419700 | -0.29467600 | 2.88844800 |
| C | -0.86908700 | 2.67384400  | 3.39576300 |
| H | -1.65201800 | 3.24535600  | 3.89183400 |
| H | -0.08474400 | 3.27056800  | 2.93349500 |

**TS-3**

|    |             |             |             |
|----|-------------|-------------|-------------|
| Rh | -0.13133700 | 0.43493700  | -0.00346900 |
| C  | 0.75748900  | -1.67623400 | 0.28600000  |
| C  | 0.35612300  | -1.56916900 | -1.10814400 |
| C  | 1.10076900  | -0.51960700 | -1.70681800 |
| C  | 1.97329100  | 0.04452000  | -0.69406700 |
| C  | 1.78669400  | -0.71114100 | 0.51920000  |
| C  | 2.98886300  | 1.11991300  | -0.94564200 |
| H  | 3.83582200  | 0.73109000  | -1.52850100 |
| H  | 2.54171000  | 1.94676100  | -1.50505300 |
| H  | 3.38890400  | 1.52307600  | -0.01061000 |
| C  | 2.55348200  | -0.54003700 | 1.79768500  |
| H  | 2.92511300  | 0.48178500  | 1.91209200  |
| H  | 1.93622200  | -0.77082400 | 2.67053900  |
| H  | 3.42229600  | -1.21278000 | 1.81714000  |
| C  | 1.04661900  | -0.05871500 | -3.13480500 |
| H  | 1.03318900  | 1.03316100  | -3.19131600 |
| H  | 1.92206000  | -0.42061900 | -3.69145000 |
| H  | 0.15299600  | -0.42822000 | -3.64469500 |
| C  | -0.64195700 | -2.46294200 | -1.78417000 |
| H  | -1.01994300 | -2.01849000 | -2.70825000 |
| H  | -0.18308800 | -3.42762400 | -2.04145900 |
| H  | -1.50166400 | -2.66604800 | -1.13899100 |
| C  | 0.29601800  | -2.72740500 | 1.25332700  |
| H  | -0.71254800 | -3.07666800 | 1.01358300  |
| H  | 0.95879200  | -3.60409700 | 1.23170800  |
| H  | 0.28335800  | -2.35049900 | 2.28091400  |
| C  | -4.36570800 | -0.81043300 | 0.53619400  |
| C  | -2.99655600 | -0.68798700 | 0.80003400  |
| C  | -2.25895200 | 0.28652600  | 0.12545300  |
| C  | -2.88079600 | 1.17032000  | -0.76612300 |
| C  | -4.24767800 | 1.04439800  | -1.02203700 |
| C  | -4.98865400 | 0.05525300  | -0.37032400 |
| H  | -4.94769200 | -1.57326700 | 1.04785600  |
| H  | -2.51588500 | -1.33216500 | 1.52999900  |
| H  | -4.69872700 | 1.72329800  | -1.74081700 |
| H  | -6.05438200 | -0.03842700 | -0.56239800 |



|   |             |            |             |
|---|-------------|------------|-------------|
| C | -2.04878200 | 2.18014300 | -1.50238700 |
| O | -2.50704900 | 2.94245700 | -2.35942200 |
| N | -0.76735300 | 2.12327700 | -1.04459200 |
| O | 0.18147300  | 2.89566200 | -1.73653200 |
| C | -0.00591000 | 4.30280600 | -1.54990900 |
| H | 0.85147100  | 4.77144000 | -2.04246400 |
| H | -0.94070500 | 4.62648200 | -2.01323200 |
| H | -0.00868100 | 4.55651300 | -0.48247500 |
| N | -0.91963800 | 1.03156200 | 1.65383400  |
| C | -1.31750100 | 2.28129600 | 2.01349100  |
| C | -2.62279800 | 2.40711000 | 2.77172300  |
| H | -2.72386200 | 3.39749600 | 3.22560300  |
| H | -3.46304000 | 2.25492300 | 2.08470800  |
| H | -2.69106000 | 1.64058900 | 3.55044000  |
| C | -0.43528700 | 3.31744800 | 1.90524200  |
| H | -0.57272100 | 4.22754900 | 2.48344600  |
| H | 0.49102400  | 3.19399400 | 1.35827600  |

#### TS-4

|    |             |             |             |
|----|-------------|-------------|-------------|
| Rh | -0.12820300 | 1.39893900  | -1.22398500 |
| C  | 0.40823400  | -0.78241400 | -1.57503900 |
| C  | -0.76063500 | -0.33916300 | -2.33736100 |
| C  | -0.30094100 | 0.61864800  | -3.33099100 |
| C  | 1.06820300  | 0.88063300  | -3.07600100 |
| C  | 1.51161800  | -0.01358100 | -1.99848500 |
| C  | 1.95807800  | 1.83992700  | -3.80504300 |
| H  | 2.68339600  | 1.30608300  | -4.43409200 |
| H  | 1.37646800  | 2.50616300  | -4.44631900 |
| H  | 2.51277700  | 2.46098900  | -3.09494500 |
| C  | 2.92239400  | -0.07103700 | -1.49770600 |
| H  | 3.30036800  | 0.93515900  | -1.29070400 |
| H  | 3.00864800  | -0.66233700 | -0.58272200 |
| H  | 3.57879600  | -0.52354600 | -2.25324000 |
| C  | -1.14041800 | 1.24631800  | -4.40283100 |
| H  | -0.94470600 | 2.31794500  | -4.47946300 |
| H  | -0.92431300 | 0.77579400  | -5.37141600 |
| H  | -2.20666200 | 1.12277700  | -4.20042100 |
| C  | -2.10787500 | -0.99535800 | -2.30127300 |
| H  | -2.89710800 | -0.31491000 | -2.63029800 |
| H  | -2.12183100 | -1.87511900 | -2.96014500 |
| H  | -2.36377400 | -1.32615000 | -1.29136200 |
| C  | 0.38529200  | -1.87101600 | -0.54375000 |
| H  | -0.46512700 | -1.75613700 | 0.13462800  |
| H  | 0.29501500  | -2.85283300 | -1.02781100 |

|   |             |             |             |
|---|-------------|-------------|-------------|
| H | 1.29438400  | -1.87814100 | 0.06219100  |
| C | -4.63659100 | -0.03261100 | 1.10138200  |
| C | -3.25636700 | 0.12006600  | 1.20082100  |
| C | -2.56413400 | 1.11216000  | 0.47379800  |
| C | -3.30556000 | 1.91704300  | -0.42779400 |
| C | -4.69524400 | 1.74977700  | -0.50712500 |
| C | -5.36913600 | 0.79513100  | 0.24889500  |
| H | -5.13316400 | -0.80675300 | 1.68137900  |
| H | -2.68847500 | -0.54609500 | 1.84270000  |
| H | -5.22564200 | 2.40708900  | -1.18799900 |
| H | -6.44698400 | 0.68918900  | 0.16426400  |
| C | -2.73854200 | 2.95834500  | -1.36166500 |
| O | -3.49152200 | 3.72965800  | -1.96628300 |
| N | -1.37593800 | 2.99433800  | -1.46860800 |
| O | -0.93751600 | 3.81254200  | -2.53662100 |
| C | -0.81482400 | 5.16799400  | -2.11484500 |
| H | -0.38636800 | 5.69962200  | -2.97045000 |
| H | -1.79786800 | 5.58341800  | -1.87314000 |
| H | -0.14315400 | 5.25154600  | -1.25296100 |
| N | -1.16563600 | 1.22493700  | 0.60029000  |
| C | -0.54743800 | 1.18849200  | 1.79372500  |
| C | -1.32613600 | 1.45956000  | 3.07583200  |
| H | -0.68581900 | 2.02612200  | 3.75834100  |
| H | -2.24032100 | 2.02910400  | 2.89606400  |
| H | -1.60132300 | 0.53029300  | 3.58655400  |
| C | 0.83995500  | 1.06249400  | 1.92531200  |
| H | 1.22765200  | 0.88296400  | 2.92609100  |
| H | 1.40269500  | 0.60386900  | 1.11536100  |
| C | 1.90188200  | 3.72875600  | 0.21558100  |
| O | 1.49633900  | 2.99248200  | -0.70360100 |
| O | 1.71512600  | 3.53329000  | 1.48249000  |
| H | 1.27498400  | 2.52409100  | 1.67771400  |
| C | 2.70166800  | 4.97563900  | -0.10653700 |
| H | 2.16292000  | 5.85581900  | 0.26081000  |
| H | 3.66364500  | 4.94461400  | 0.41521900  |
| H | 2.85797400  | 5.06524800  | -1.18252300 |

### INT-2a

|    |            |             |             |
|----|------------|-------------|-------------|
| Rh | 0.00252400 | 0.24505700  | -0.03928300 |
| C  | 1.40988500 | -1.29127300 | 0.84335600  |
| C  | 1.04846400 | -1.69348000 | -0.46572500 |
| C  | 1.45316100 | -0.62577700 | -1.36137900 |
| C  | 2.25377900 | 0.33789700  | -0.60203600 |
| C  | 2.19238300 | -0.04351200 | 0.74538700  |

|   |             |             |             |
|---|-------------|-------------|-------------|
| C | 2.92807000  | 1.53948500  | -1.19766000 |
| H | 3.53989500  | 1.25452600  | -2.06212000 |
| H | 2.19437500  | 2.28457600  | -1.52493100 |
| H | 3.58541000  | 2.02411700  | -0.47072400 |
| C | 2.81416700  | 0.64045500  | 1.92473200  |
| H | 3.58018700  | -0.00393500 | 2.37740700  |
| H | 3.29074800  | 1.58101900  | 1.63787700  |
| H | 2.07279500  | 0.86685800  | 2.69781800  |
| C | 1.31585100  | -0.63088800 | -2.85273700 |
| H | 1.24341300  | 0.38652200  | -3.24745300 |
| H | 2.19370100  | -1.10747100 | -3.31337800 |
| H | 0.42895900  | -1.18450300 | -3.17213300 |
| C | 0.42494100  | -2.98953300 | -0.89115000 |
| H | -0.33959300 | -2.84165300 | -1.65924200 |
| H | 1.19029900  | -3.65943900 | -1.30645500 |
| H | -0.04193300 | -3.50941400 | -0.05045900 |
| C | 1.21473600  | -2.05861500 | 2.11667400  |
| H | 0.44672700  | -2.82941700 | 2.01019500  |
| H | 2.14972700  | -2.55804500 | 2.40821200  |
| H | 0.91681100  | -1.40637500 | 2.94258200  |
| C | -4.01312400 | -1.60722200 | -0.20565300 |
| C | -2.62263400 | -1.48270900 | -0.05593500 |
| C | -1.99634300 | -0.24149000 | -0.21032000 |
| C | -2.81191700 | 0.86751600  | -0.49964600 |
| C | -4.19323700 | 0.75838500  | -0.65385600 |
| C | -4.79982700 | -0.49389200 | -0.51186200 |
| H | -4.48033500 | -2.58240500 | -0.08418800 |
| H | -2.04441300 | -2.36931100 | 0.18827500  |
| H | -4.76927100 | 1.64991800  | -0.88886100 |
| H | -5.87385700 | -0.60095300 | -0.64103700 |
| C | -2.12354500 | 2.19328200  | -0.61392000 |
| O | -2.66109200 | 3.24636000  | -0.93136400 |
| N | -0.78506300 | 2.04288100  | -0.25578100 |
| O | 0.01528700  | 3.16551000  | -0.51631200 |
| C | -0.01493800 | 4.07930300  | 0.58488600  |
| H | 0.72633500  | 4.84692700  | 0.34488500  |
| H | -1.00497300 | 4.53916600  | 0.67270500  |
| H | 0.25508600  | 3.57250600  | 1.51910100  |
| C | -2.32411700 | 1.52632500  | 3.30749000  |
| H | -2.70863400 | 2.41609500  | 3.81951500  |
| H | -2.37319500 | 1.71681900  | 2.22932700  |
| N | -2.21444400 | -0.60745800 | 4.22468300  |
| O | -0.88864600 | -0.04120200 | 4.24979000  |
| C | -0.89768900 | 1.22345700  | 3.71776100  |

|   |             |             |            |
|---|-------------|-------------|------------|
| O | 0.10543200  | 1.88627300  | 3.62718200 |
| C | -3.01031700 | 0.25756700  | 3.70547900 |
| C | -4.46054600 | -0.04944400 | 3.52632300 |
| H | -5.07992900 | 0.70361400  | 4.02846800 |
| H | -4.71893700 | -0.03727500 | 2.46069500 |
| H | -4.69098000 | -1.03496000 | 3.93844400 |

**INT-3a**

|    |             |             |             |
|----|-------------|-------------|-------------|
| Rh | -0.36543400 | 0.32993900  | 0.77496200  |
| C  | 0.84727200  | -1.68752300 | 0.74780000  |
| C  | 0.50120500  | -1.33587700 | -0.60963000 |
| C  | 1.24780900  | -0.14818900 | -0.97022400 |
| C  | 1.96923200  | 0.27861600  | 0.17585100  |
| C  | 1.70391100  | -0.66103000 | 1.24839200  |
| C  | 2.83721300  | 1.48683700  | 0.31716000  |
| H  | 3.83132400  | 1.20897300  | 0.68888400  |
| H  | 2.95636100  | 2.01237300  | -0.63196200 |
| H  | 2.38626200  | 2.17929200  | 1.03989600  |
| C  | 2.29193400  | -0.57610200 | 2.62100500  |
| H  | 3.35249500  | -0.86250000 | 2.60733800  |
| H  | 2.22394700  | 0.44843100  | 3.00076500  |
| H  | 1.76889500  | -1.23484900 | 3.31804000  |
| C  | 1.28065800  | 0.47048500  | -2.33399300 |
| H  | 1.48913100  | 1.53950300  | -2.28078100 |
| H  | 2.05543300  | -0.01097400 | -2.94704500 |
| H  | 0.32667500  | 0.35079700  | -2.85440500 |
| C  | -0.26044000 | -2.19406400 | -1.57270700 |
| H  | -0.75769700 | -1.59509200 | -2.33969800 |
| H  | 0.42898800  | -2.88327300 | -2.08003600 |
| H  | -1.02601500 | -2.78759100 | -1.06913300 |
| C  | 0.39210300  | -2.88242800 | 1.51786800  |
| H  | -0.15151100 | -3.59015900 | 0.88722600  |
| H  | 1.24524300  | -3.40756800 | 1.96254300  |
| H  | -0.27035900 | -2.55538100 | 2.33369300  |
| C  | -4.14678600 | -1.79075600 | -0.04440100 |
| C  | -2.93282800 | -1.44215300 | 0.56083200  |
| C  | -2.25332500 | -0.30353300 | 0.12543100  |
| C  | -2.79497500 | 0.47280400  | -0.89990000 |
| C  | -4.00476400 | 0.12221800  | -1.50859700 |
| C  | -4.68389300 | -1.01447900 | -1.07783300 |
| H  | -4.67769000 | -2.67556800 | 0.29992100  |
| H  | -2.53815600 | -2.04735600 | 1.36947500  |
| H  | -4.38162000 | 0.75120600  | -2.31068900 |
| H  | -5.62630000 | -1.29756400 | -1.53884400 |

|   |             |             |             |
|---|-------------|-------------|-------------|
| C | -2.02595000 | 1.67155900  | -1.32390300 |
| O | -2.26397900 | 2.37483500  | -2.29941700 |
| N | -1.02627800 | 1.89562700  | -0.39577100 |
| O | -0.05885400 | 2.81731400  | -0.77322400 |
| C | -0.37993400 | 4.14258200  | -0.32147100 |
| H | 0.44249000  | 4.76491600  | -0.68486400 |
| H | -1.32002600 | 4.47097600  | -0.77522400 |
| H | -0.42663900 | 4.19145600  | 0.76859800  |
| C | -1.97525400 | 1.85548800  | 3.05153200  |
| H | -2.49043500 | 2.36067100  | 3.87099400  |
| H | -2.58443000 | 1.94732500  | 2.14247400  |
| N | -1.13470800 | -0.40101900 | 2.54797100  |
| O | 0.19973900  | 1.92761200  | 2.00731500  |
| C | -0.63371400 | 2.55834100  | 2.79873700  |
| O | -0.37063100 | 3.63427100  | 3.31630700  |
| C | -1.74287100 | 0.38517400  | 3.33475000  |
| C | -2.23941700 | -0.15305000 | 4.66438800  |
| H | -1.78409100 | 0.40803400  | 5.49001400  |
| H | -3.32629700 | -0.02080700 | 4.73887900  |
| H | -1.99840000 | -1.21300100 | 4.77035600  |

**TS-1a**

|    |             |             |             |
|----|-------------|-------------|-------------|
| Rh | -0.19784300 | 0.34339500  | 0.58623700  |
| C  | 1.11771100  | -1.60623700 | 0.95833400  |
| C  | 0.62796300  | -1.54857200 | -0.37069800 |
| C  | 1.16651600  | -0.34020000 | -0.98232000 |
| C  | 2.11026400  | 0.25598800  | -0.04705300 |
| C  | 2.01978500  | -0.47356900 | 1.15386400  |
| C  | 2.98400400  | 1.43577900  | -0.34858500 |
| H  | 3.73072600  | 1.17803500  | -1.11170500 |
| H  | 2.38615200  | 2.27043500  | -0.72480500 |
| H  | 3.52158700  | 1.77569300  | 0.54055900  |
| C  | 2.72123000  | -0.19426000 | 2.44736000  |
| H  | 3.42774000  | -1.00016200 | 2.68761900  |
| H  | 3.27681100  | 0.74521600  | 2.41358500  |
| H  | 2.00143200  | -0.12847900 | 3.27013000  |
| C  | 1.01959200  | 0.06271400  | -2.41980200 |
| H  | 1.05916300  | 1.14991600  | -2.52467300 |
| H  | 1.83198400  | -0.37043600 | -3.02054200 |
| H  | 0.07149700  | -0.28240200 | -2.84037500 |
| C  | -0.17488300 | -2.58798400 | -1.09380100 |
| H  | -0.87972800 | -2.13589000 | -1.79538900 |
| H  | 0.49636900  | -3.24387300 | -1.66513900 |
| H  | -0.74937400 | -3.21427800 | -0.40747300 |

|   |             |             |             |
|---|-------------|-------------|-------------|
| C | 0.83703300  | -2.65077200 | 1.99005400  |
| H | 0.28882500  | -3.49790900 | 1.56838700  |
| H | 1.76648600  | -3.03676000 | 2.42679900  |
| H | 0.23818200  | -2.22748700 | 2.81002400  |
| C | -4.15139400 | -1.42585300 | -0.04450100 |
| C | -2.84308400 | -1.24182600 | 0.42489000  |
| C | -2.12211700 | -0.10170400 | 0.05429200  |
| C | -2.73492400 | 0.84206300  | -0.77841700 |
| C | -4.03635000 | 0.66075300  | -1.25443500 |
| C | -4.74836500 | -0.48020900 | -0.88524300 |
| H | -4.70342900 | -2.31798800 | 0.24461900  |
| H | -2.40085800 | -1.99430300 | 1.07383300  |
| H | -4.46183400 | 1.41831000  | -1.90731600 |
| H | -5.76119300 | -0.63562900 | -1.24735000 |
| C | -1.92255700 | 2.04038000  | -1.13717000 |
| O | -2.23437100 | 2.88991700  | -1.96557800 |
| N | -0.78917100 | 2.05873800  | -0.34364600 |
| O | 0.19051400  | 2.96135300  | -0.77050000 |
| C | 0.02041500  | 4.24403700  | -0.14579900 |
| H | 0.88283300  | 4.83317700  | -0.47183700 |
| H | -0.90320600 | 4.70997500  | -0.50260300 |
| H | 0.00762900  | 4.15281400  | 0.94377400  |
| C | -2.54622500 | 1.59542900  | 3.06878800  |
| H | -3.16461700 | 2.00528600  | 3.87159100  |
| H | -3.12523400 | 1.64422900  | 2.13528700  |
| N | -0.97450600 | -0.19432400 | 2.85232700  |
| O | -0.24283800 | 1.62274200  | 2.52523800  |
| C | -1.25645100 | 2.39793100  | 2.87188800  |
| O | -1.16487400 | 3.59967100  | 3.03936300  |
| C | -2.09652300 | 0.18654400  | 3.30642600  |
| C | -2.92053700 | -0.79136400 | 4.11492500  |
| H | -3.16450900 | -0.35568100 | 5.09110500  |
| H | -3.85868800 | -0.99188800 | 3.58445300  |
| H | -2.38564100 | -1.73221500 | 4.26065400  |

**INT-3b**

|    |             |             |             |
|----|-------------|-------------|-------------|
| Rh | -0.37764800 | 0.46740900  | 0.24867100  |
| C  | 0.69244600  | -1.54633200 | 0.01841600  |
| C  | 0.33452700  | -1.17364000 | -1.36326700 |
| C  | 0.94196300  | 0.04422700  | -1.66810000 |
| C  | 1.64915100  | 0.49585200  | -0.45703900 |
| C  | 1.60507800  | -0.58544200 | 0.51571200  |
| C  | 2.53062800  | 1.70614400  | -0.40569100 |
| H  | 3.43987300  | 1.54843200  | -1.00324200 |

|   |             |             |             |
|---|-------------|-------------|-------------|
| H | 2.00146400  | 2.57431700  | -0.80867200 |
| H | 2.84006100  | 1.93665600  | 0.61794900  |
| C | 2.48173300  | -0.70180000 | 1.72630200  |
| H | 3.46238200  | -1.10105500 | 1.43106300  |
| H | 2.65882700  | 0.26588700  | 2.20464000  |
| H | 2.06494100  | -1.38022200 | 2.47453300  |
| C | 0.88693300  | 0.82141300  | -2.95013500 |
| H | 0.54008900  | 1.84366800  | -2.77209600 |
| H | 1.88396700  | 0.87512500  | -3.40848100 |
| H | 0.21280600  | 0.35733200  | -3.67492500 |
| C | -0.56168900 | -2.00173100 | -2.23410500 |
| H | -0.73166000 | -1.52868400 | -3.20417300 |
| H | -0.12280900 | -2.99230000 | -2.41335200 |
| H | -1.54057900 | -2.15987700 | -1.76551200 |
| C | 0.31087100  | -2.85033900 | 0.65686100  |
| H | -0.74184600 | -3.09150000 | 0.47502300  |
| H | 0.90971200  | -3.67678900 | 0.24844000  |
| H | 0.46802100  | -2.83262500 | 1.73892900  |
| C | -4.27819300 | -1.59838700 | 0.55257600  |
| C | -3.59233200 | -0.79966800 | 1.45980200  |
| C | -2.97106700 | 0.39649600  | 1.05487000  |
| C | -3.07512500 | 0.81480100  | -0.29995500 |
| C | -3.83028000 | 0.02065300  | -1.18290200 |
| C | -4.41160900 | -1.17416900 | -0.77576100 |
| H | -4.74652000 | -2.52017100 | 0.88627800  |
| H | -3.54782000 | -1.05770600 | 2.51308600  |
| H | -3.94498600 | 0.38474800  | -2.19871500 |
| H | -4.98457300 | -1.76718900 | -1.48359600 |
| C | -2.42091800 | 2.03693200  | -0.93434900 |
| O | -2.93754900 | 2.60639800  | -1.89424800 |
| N | -1.22140600 | 2.29851900  | -0.34679300 |
| O | -0.39612900 | 3.18459800  | -1.09323600 |
| C | -0.79953400 | 4.55152400  | -0.93311000 |
| H | -0.04191600 | 5.12988700  | -1.47092200 |
| H | -1.78279100 | 4.71560000  | -1.38143000 |
| H | -0.81408500 | 4.84203400  | 0.12175900  |
| C | -0.51326600 | 2.58298300  | 2.50350200  |
| H | 0.27951400  | 3.00354200  | 1.88246200  |
| H | -0.21573300 | 2.70616100  | 3.55533500  |
| N | -2.36349800 | 1.14590500  | 2.13915500  |
| O | -2.82967600 | 2.51769700  | 2.08178500  |
| C | -1.78925100 | 3.37231000  | 2.29170200  |
| O | -1.95973300 | 4.56425800  | 2.34623200  |
| C | -0.87264100 | 1.13551100  | 2.17909900  |

|   |             |             |            |
|---|-------------|-------------|------------|
| C | -0.44245100 | 0.15575000  | 3.27083000 |
| H | 0.64291200  | 0.16534100  | 3.39510400 |
| H | -0.89684900 | 0.44395300  | 4.22969200 |
| H | -0.75516000 | -0.87030100 | 3.05049100 |

**TS-1b**

|    |             |             |             |
|----|-------------|-------------|-------------|
| Rh | -0.37947000 | 0.47229500  | 0.39858800  |
| C  | 0.71730700  | -1.56661800 | 0.21359600  |
| C  | 0.20527700  | -1.25644600 | -1.10981300 |
| C  | 0.77295100  | -0.03015900 | -1.51960000 |
| C  | 1.68782700  | 0.42380300  | -0.46338700 |
| C  | 1.69468400  | -0.57301900 | 0.55848600  |
| C  | 2.60546800  | 1.60330400  | -0.58362700 |
| H  | 3.42690800  | 1.38954600  | -1.28242500 |
| H  | 2.06287500  | 2.47754400  | -0.95253800 |
| H  | 3.05149900  | 1.86447300  | 0.38082800  |
| C  | 2.64452900  | -0.63730000 | 1.71859500  |
| H  | 3.57426600  | -1.13687300 | 1.41250600  |
| H  | 2.91761700  | 0.35722600  | 2.08406700  |
| H  | 2.23430700  | -1.20663400 | 2.55673400  |
| C  | 0.57245900  | 0.68591700  | -2.82278000 |
| H  | 0.43377300  | 1.75934400  | -2.66468400 |
| H  | 1.44852300  | 0.54748900  | -3.47186100 |
| H  | -0.30259200 | 0.31256700  | -3.36081100 |
| C  | -0.74716900 | -2.11711000 | -1.88605000 |
| H  | -1.14199700 | -1.59096300 | -2.75862500 |
| H  | -0.24292600 | -3.02519200 | -2.24404100 |
| H  | -1.60110900 | -2.43192200 | -1.27738100 |
| C  | 0.44716700  | -2.84302700 | 0.95819700  |
| H  | -0.57979300 | -3.18682800 | 0.80305200  |
| H  | 1.11542400  | -3.64636000 | 0.61607200  |
| H  | 0.60343900  | -2.72922900 | 2.03540100  |
| C  | -4.24817700 | -1.57432600 | -0.03974500 |
| C  | -3.17294400 | -1.12731400 | 0.72621700  |
| C  | -2.55169600 | 0.08681700  | 0.40659200  |
| C  | -3.04246800 | 0.88390300  | -0.64495700 |
| C  | -4.13601600 | 0.43312700  | -1.39072100 |
| C  | -4.74078100 | -0.78647500 | -1.09025100 |
| H  | -4.72779200 | -2.51872700 | 0.20509500  |
| H  | -2.84288500 | -1.68644100 | 1.59712500  |
| H  | -4.47002200 | 1.05103800  | -2.21951500 |
| H  | -5.59834700 | -1.12464900 | -1.66536000 |
| C  | -2.28503300 | 2.09741700  | -1.10309500 |
| O  | -2.63474600 | 2.78308700  | -2.06394400 |



|   |             |             |             |
|---|-------------|-------------|-------------|
| N | -1.18499500 | 2.28742700  | -0.29914300 |
| O | -0.24810900 | 3.23287800  | -0.79157800 |
| C | -0.72594200 | 4.58707000  | -0.73193800 |
| H | 0.13786200  | 5.19538200  | -1.01675400 |
| H | -1.54715100 | 4.73623100  | -1.43541500 |
| H | -1.04692500 | 4.84977100  | 0.28074000  |
| C | -0.68145300 | 2.69433900  | 2.55794500  |
| H | 0.04060500  | 3.19741900  | 1.91156700  |
| H | -0.44932500 | 2.95497400  | 3.60051800  |
| N | -2.13507100 | 0.85949100  | 2.11975300  |
| O | -2.87652300 | 2.04303600  | 2.03624700  |
| C | -2.08049000 | 3.16819700  | 2.24619200  |
| O | -2.56348800 | 4.26532400  | 2.24888900  |
| C | -0.77559200 | 1.19431700  | 2.35693600  |
| C | -0.16146100 | 0.31800000  | 3.43777500  |
| H | 0.91766800  | 0.47629700  | 3.49620100  |
| H | -0.59238400 | 0.57528100  | 4.41669300  |
| H | -0.35399200 | -0.74258300 | 3.25592000  |

#### INT-6c

|    |             |             |             |
|----|-------------|-------------|-------------|
| Rh | 0.01154400  | 1.28148500  | -1.18032200 |
| C  | 0.89100000  | -0.82159800 | -1.49555200 |
| C  | -0.40766900 | -0.71215100 | -2.15677700 |
| C  | -0.30894300 | 0.29758200  | -3.16209400 |
| C  | 1.01584900  | 0.87428900  | -3.08432500 |
| C  | 1.76384900  | 0.12186900  | -2.09110300 |
| C  | 1.56676900  | 1.91589500  | -4.01063800 |
| H  | 1.89843300  | 1.46365900  | -4.95600900 |
| H  | 0.80897900  | 2.67036000  | -4.23437500 |
| H  | 2.42466800  | 2.42730100  | -3.56583900 |
| C  | 3.21709800  | 0.30442000  | -1.77999700 |
| H  | 3.52690300  | 1.34342900  | -1.92202300 |
| H  | 3.44136500  | 0.02675900  | -0.74971100 |
| H  | 3.82035700  | -0.31649700 | -2.45741800 |
| C  | -1.36518500 | 0.70082600  | -4.14677200 |
| H  | -1.40136000 | 1.78662200  | -4.26672700 |
| H  | -1.15067900 | 0.25377400  | -5.12719000 |
| H  | -2.35871100 | 0.36725700  | -3.83793300 |
| C  | -1.57782600 | -1.62186900 | -1.92589600 |
| H  | -2.51676600 | -1.16241300 | -2.24360500 |
| H  | -1.45095900 | -2.55534800 | -2.49130700 |
| H  | -1.68559900 | -1.89105100 | -0.87127800 |
| C  | 1.25855900  | -1.78230700 | -0.40275200 |
| H  | 0.37022900  | -2.23705700 | 0.04744300  |

|   |             |             |             |
|---|-------------|-------------|-------------|
| H | 1.87996300  | -2.60173900 | -0.78810800 |
| H | 1.81712100  | -1.26235700 | 0.38133300  |
| C | -4.51909700 | -0.48156100 | 0.94220600  |
| C | -3.18975200 | -0.13786100 | 1.18376800  |
| C | -2.55001300 | 0.83775600  | 0.41219100  |
| C | -3.24314200 | 1.50862800  | -0.61211500 |
| C | -4.58894100 | 1.16493400  | -0.81699500 |
| C | -5.22332500 | 0.18029100  | -0.06393200 |
| H | -4.99804700 | -1.24914300 | 1.54370600  |
| H | -2.64005500 | -0.61852900 | 1.99025500  |
| H | -5.11507300 | 1.70948300  | -1.59357100 |
| H | -6.26342900 | -0.06569700 | -0.25898000 |
| C | -2.71416800 | 2.58950700  | -1.55295500 |
| O | -3.52295200 | 3.23412900  | -2.22658300 |
| N | -1.36674800 | 2.77932300  | -1.55291900 |
| O | -0.96350600 | 3.64919800  | -2.58987100 |
| C | -0.61359600 | 4.92459400  | -2.05636600 |
| H | -0.26366600 | 5.51042700  | -2.91226700 |
| H | -1.49071600 | 5.41445800  | -1.61610400 |
| H | 0.18575800  | 4.82594100  | -1.31483000 |
| N | -1.15217200 | 1.13384600  | 0.73274500  |
| C | -1.00341000 | 2.12706800  | 1.80192700  |
| C | -1.61105400 | 3.48077700  | 1.58391200  |
| H | -1.49344400 | 4.08178600  | 2.48962400  |
| H | -1.11987200 | 3.98368100  | 0.74838300  |
| H | -2.67957400 | 3.41922700  | 1.35091200  |
| C | -0.34889600 | 1.77805400  | 2.91309700  |
| H | -0.21398200 | 2.49286300  | 3.71790800  |
| H | 0.12186800  | 0.80769400  | 3.03605100  |
| C | 2.01414700  | 2.28728100  | 0.69519500  |
| O | 1.19992900  | 2.73013900  | -0.21896200 |
| O | 2.13364700  | 1.10959300  | 1.05636900  |
| H | -0.72596300 | 0.28097300  | 1.09208200  |
| C | 2.83652900  | 3.39313600  | 1.35321700  |
| H | 3.69299700  | 2.96360600  | 1.87792300  |
| H | 3.17241100  | 4.12796900  | 0.61569500  |
| H | 2.20676200  | 3.91928700  | 2.08037700  |

**TS-4c**

|    |             |             |             |
|----|-------------|-------------|-------------|
| Rh | -0.02797400 | 1.45931100  | -1.23523800 |
| C  | 0.58484200  | -0.75768800 | -1.51644500 |
| C  | -0.55423300 | -0.37482000 | -2.33885000 |
| C  | -0.08854800 | 0.58497600  | -3.32486900 |
| C  | 1.25768000  | 0.90031900  | -3.01694300 |

|   |             |             |             |
|---|-------------|-------------|-------------|
| C | 1.68185200  | 0.03917800  | -1.90556000 |
| C | 2.15203000  | 1.86361100  | -3.73899300 |
| H | 2.82126800  | 1.33759500  | -4.43414300 |
| H | 1.57054500  | 2.58942000  | -4.31273000 |
| H | 2.77734800  | 2.42288600  | -3.03572200 |
| C | 3.08365600  | -0.02439200 | -1.37804700 |
| H | 3.53697800  | 0.97077200  | -1.33117000 |
| H | 3.12275000  | -0.46456100 | -0.37933400 |
| H | 3.71176800  | -0.63393600 | -2.04226100 |
| C | -0.90963000 | 1.09643400  | -4.46977800 |
| H | -0.46712700 | 1.98684300  | -4.91872500 |
| H | -0.97739500 | 0.31822400  | -5.24303900 |
| H | -1.92371600 | 1.35967000  | -4.15975100 |
| C | -1.86126300 | -1.10637200 | -2.40101900 |
| H | -2.65985900 | -0.47398200 | -2.79536500 |
| H | -1.76658700 | -1.97808000 | -3.06483200 |
| H | -2.17493100 | -1.46689100 | -1.41848600 |
| C | 0.55274500  | -1.81012400 | -0.44978900 |
| H | -0.36643900 | -1.74470900 | 0.14156800  |
| H | 0.58479300  | -2.81334200 | -0.89612600 |
| H | 1.40009200  | -1.71950600 | 0.23462600  |
| C | -3.87411800 | -0.79655000 | 1.35955800  |
| C | -2.60659700 | -0.21791700 | 1.43635800  |
| C | -2.22057800 | 0.80787600  | 0.56150900  |
| C | -3.13619100 | 1.25555400  | -0.42346600 |
| C | -4.41285100 | 0.67741900  | -0.46758600 |
| C | -4.78780700 | -0.33818600 | 0.40920300  |
| H | -4.14632400 | -1.59352500 | 2.04716600  |
| H | -1.89707000 | -0.53928000 | 2.19360100  |
| H | -5.09662700 | 1.05085800  | -1.22292900 |
| H | -5.78261600 | -0.77106100 | 0.34783700  |
| C | -2.85773700 | 2.28646900  | -1.50903900 |
| O | -3.77739300 | 2.67351900  | -2.23935100 |
| N | -1.57247300 | 2.75120900  | -1.59049400 |
| O | -1.35066000 | 3.53040800  | -2.75499400 |
| C | -1.57644000 | 4.90961400  | -2.48716500 |
| H | -1.38041800 | 5.42261100  | -3.43396800 |
| H | -2.61471500 | 5.08372900  | -2.18549700 |
| H | -0.88921400 | 5.28696700  | -1.71874200 |
| N | -0.91914400 | 1.40021300  | 0.72676800  |
| C | -1.03083000 | 2.55417500  | 1.62226900  |
| C | -1.64213900 | 3.86282900  | 1.18498200  |
| H | -1.68885500 | 4.54799100  | 2.03774800  |
| H | -1.05619500 | 4.32429200  | 0.38801200  |

|   |             |            |             |
|---|-------------|------------|-------------|
| H | -2.65784000 | 3.72991900 | 0.79980300  |
| C | -0.62747100 | 2.39812400 | 2.89367700  |
| H | -0.73785800 | 3.20574200 | 3.61211100  |
| H | -0.19609100 | 1.47226100 | 3.25843700  |
| C | 1.98208900  | 2.16451400 | 0.86036600  |
| O | 1.46883400  | 2.75524900 | -0.11188700 |
| O | 1.52301400  | 1.05492200 | 1.37782100  |
| H | 0.46100400  | 0.94707000 | 1.12409300  |
| C | 3.20737800  | 2.72335400 | 1.53862600  |
| H | 2.89737300  | 3.19230200 | 2.47993500  |
| H | 3.90558300  | 1.91869000 | 1.78653900  |
| H | 3.68928000  | 3.47179100 | 0.90783600  |

### TS-5c

|    |             |             |             |
|----|-------------|-------------|-------------|
| Rh | -0.01961400 | 1.24360900  | -1.11430000 |
| C  | 0.99577600  | -0.78055700 | -1.39496700 |
| C  | -0.32224000 | -0.79168100 | -1.99972200 |
| C  | -0.34974500 | 0.19346800  | -3.04174400 |
| C  | 0.95112900  | 0.82694100  | -3.08827300 |
| C  | 1.77630500  | 0.19453800  | -2.09070400 |
| C  | 1.38146000  | 1.84299100  | -4.10314600 |
| H  | 1.56353600  | 1.36594600  | -5.07649000 |
| H  | 0.61618600  | 2.61239700  | -4.23135900 |
| H  | 2.30600100  | 2.34199100  | -3.80086400 |
| C  | 3.22714100  | 0.47792000  | -1.84919000 |
| H  | 3.50403500  | 1.47832000  | -2.19243800 |
| H  | 3.47247000  | 0.39982100  | -0.78905400 |
| H  | 3.83999800  | -0.24439800 | -2.40659000 |
| C  | -1.48157800 | 0.48000300  | -3.98332000 |
| H  | -1.53994000 | 1.54562000  | -4.22026400 |
| H  | -1.34025800 | -0.07099600 | -4.92347300 |
| H  | -2.44517400 | 0.18053500  | -3.56306200 |
| C  | -1.42475400 | -1.74671500 | -1.65727600 |
| H  | -2.40492100 | -1.35252100 | -1.93482400 |
| H  | -1.27841100 | -2.69525000 | -2.19207200 |
| H  | -1.44677800 | -1.97048800 | -0.58721100 |
| C  | 1.48682500  | -1.68286500 | -0.30155100 |
| H  | 0.65272900  | -2.08461000 | 0.28179300  |
| H  | 2.04527100  | -2.53719800 | -0.70914800 |
| H  | 2.13810900  | -1.13105300 | 0.38095100  |
| C  | -4.77194600 | -0.32396600 | 0.64062100  |
| C  | -3.42034500 | -0.12398600 | 0.91763400  |
| C  | -2.67613000 | 0.85904300  | 0.24893500  |
| C  | -3.30345200 | 1.65591100  | -0.73493700 |

|   |             |             |             |
|---|-------------|-------------|-------------|
| C | -4.66691600 | 1.44338400  | -0.99131400 |
| C | -5.40091100 | 0.46971300  | -0.31897200 |
| H | -5.32405300 | -1.09534500 | 1.17098900  |
| H | -2.92103500 | -0.74082500 | 1.66120900  |
| H | -5.12389200 | 2.08004000  | -1.74157400 |
| H | -6.45402900 | 0.32861500  | -0.54606600 |
| C | -2.65658800 | 2.73608800  | -1.59123800 |
| O | -3.37618800 | 3.47305800  | -2.27323800 |
| N | -1.29965400 | 2.82919900  | -1.51418100 |
| O | -0.78114200 | 3.70276300  | -2.49917800 |
| C | -0.52079600 | 4.98520100  | -1.93775900 |
| H | -0.08252100 | 5.57542500  | -2.74904300 |
| H | -1.45262200 | 5.46077400  | -1.60816200 |
| H | 0.18985700  | 4.90579000  | -1.10768900 |
| N | -1.28703100 | 0.99644900  | 0.61781900  |
| C | -1.01545500 | 1.93602500  | 1.64936700  |
| C | -1.62164400 | 3.28539200  | 1.73100200  |
| H | -1.37875600 | 3.78211900  | 2.67238600  |
| H | -1.22060000 | 3.85774400  | 0.88629400  |
| H | -2.70808300 | 3.24150400  | 1.59209700  |
| C | -0.28196000 | 1.26462300  | 2.63034000  |
| H | -0.18971700 | 1.66313100  | 3.63924500  |
| H | 0.62901500  | 0.76854800  | 2.25443600  |
| C | 2.06418000  | 2.35714900  | 0.79566300  |
| O | 1.06733500  | 2.69449300  | 0.03874900  |
| O | 2.37029500  | 1.20294100  | 1.13763800  |
| H | -0.93729500 | 0.31044700  | 1.87968500  |
| C | 2.88476000  | 3.54950200  | 1.28648600  |
| H | 3.63102300  | 3.22431000  | 2.01433700  |
| H | 3.38896700  | 4.02496800  | 0.43723000  |
| H | 2.23021800  | 4.30450000  | 1.73460000  |

**TS-6c**

|    |             |             |             |
|----|-------------|-------------|-------------|
| Rh | 0.00184500  | 1.34101300  | -0.71444500 |
| C  | 1.00022000  | -0.58553300 | -1.17102200 |
| C  | -0.33031500 | -0.69800900 | -1.73844300 |
| C  | -0.48273100 | 0.31275300  | -2.72790800 |
| C  | 0.77243600  | 1.04416500  | -2.81600100 |
| C  | 1.69401300  | 0.44179500  | -1.90471900 |
| C  | 1.08807700  | 2.08094700  | -3.85114500 |
| H  | 1.40350400  | 1.59932800  | -4.78781200 |
| H  | 0.21627500  | 2.70014100  | -4.07948300 |
| H  | 1.89883900  | 2.74003700  | -3.53021600 |
| C  | 3.14471600  | 0.78212300  | -1.77102900 |

|   |             |             |             |
|---|-------------|-------------|-------------|
| H | 3.33435500  | 1.83475200  | -1.99604300 |
| H | 3.50795700  | 0.57288400  | -0.76409500 |
| H | 3.72434900  | 0.17730600  | -2.48264600 |
| C | -1.64403800 | 0.52466200  | -3.65131400 |
| H | -1.95356900 | 1.57492600  | -3.68774300 |
| H | -1.36398500 | 0.22722300  | -4.67117800 |
| H | -2.51273000 | -0.06514800 | -3.35470800 |
| C | -1.30016500 | -1.78748100 | -1.40807700 |
| H | -2.31344900 | -1.55827700 | -1.74075300 |
| H | -0.98077400 | -2.71667300 | -1.90045000 |
| H | -1.33767700 | -1.98190800 | -0.33326300 |
| C | 1.61132300  | -1.50508200 | -0.15722000 |
| H | 0.83968000  | -2.01398900 | 0.42693700  |
| H | 2.22233300  | -2.27542300 | -0.64930600 |
| H | 2.23553600  | -0.93833600 | 0.53733800  |
| C | -4.59666800 | -0.74788900 | 0.01423900  |
| C | -3.42585200 | -0.36780300 | 0.67846600  |
| C | -2.71607400 | 0.76413600  | 0.26878700  |
| C | -3.20673000 | 1.53061200  | -0.81759800 |
| C | -4.37784500 | 1.14322800  | -1.47189100 |
| C | -5.07288800 | 0.00149900  | -1.06396100 |
| H | -5.13981500 | -1.62919900 | 0.34616700  |
| H | -3.05302300 | -0.93370100 | 1.52729500  |
| H | -4.73431100 | 1.75708100  | -2.29321200 |
| H | -5.98563000 | -0.29181800 | -1.57489600 |
| C | -2.53371500 | 2.81320200  | -1.23864400 |
| O | -2.98172500 | 3.51080800  | -2.14124700 |
| N | -1.37333000 | 3.12602500  | -0.50121500 |
| O | -0.99691900 | 4.47216000  | -0.63951700 |
| C | -0.16672000 | 4.72757700  | -1.77179800 |
| H | 0.06324200  | 5.79536200  | -1.71210500 |
| H | 0.75649400  | 4.14600500  | -1.70027000 |
| H | -0.70242900 | 4.52071400  | -2.70350600 |
| N | -1.53129000 | 1.16888300  | 0.94474600  |
| C | -1.60800700 | 2.46513300  | 1.35911300  |
| C | -2.91709200 | 3.11282300  | 1.80017900  |
| H | -2.78467300 | 4.19853400  | 1.82406700  |
| H | -3.77998100 | 2.87381200  | 1.18084300  |
| H | -3.13004200 | 2.77796000  | 2.82367600  |
| C | 2.34933100  | 2.30030300  | 0.93673500  |
| O | 1.42016700  | 2.67515700  | 0.10549000  |
| O | 2.48883900  | 1.17394100  | 1.41953600  |
| C | 3.28695200  | 3.44270100  | 1.32967700  |
| H | 4.21035100  | 3.04010700  | 1.75228100  |

|   |             |            |            |
|---|-------------|------------|------------|
| H | 3.50829200  | 4.08826800 | 0.47476300 |
| H | 2.79548000  | 4.06141400 | 2.09037000 |
| C | -0.45408400 | 3.01289800 | 2.16523800 |
| H | -0.03466300 | 3.89867400 | 1.68331700 |
| H | -0.83110600 | 3.30783600 | 3.15186100 |
| H | 0.31916700  | 2.25816300 | 2.29458400 |

### INT-6d

|    |             |             |             |
|----|-------------|-------------|-------------|
| Rh | 0.24671000  | 1.03718800  | -0.14733100 |
| C  | 1.47930600  | -0.82681100 | 0.16285400  |
| C  | 0.69446800  | -1.06893900 | -1.03949900 |
| C  | 1.04354700  | -0.08368200 | -1.99367700 |
| C  | 2.05464000  | 0.78833900  | -1.40183700 |
| C  | 2.36062300  | 0.27476800  | -0.09594800 |
| C  | 2.77002900  | 1.88643000  | -2.13110900 |
| H  | 3.50015600  | 1.47670100  | -2.84369700 |
| H  | 2.05801900  | 2.50557900  | -2.68221800 |
| H  | 3.31199900  | 2.53752600  | -1.43869500 |
| C  | 3.43909500  | 0.77735000  | 0.81909500  |
| H  | 3.61780200  | 1.84739100  | 0.68121000  |
| H  | 3.19027500  | 0.61256400  | 1.87195000  |
| H  | 4.38517400  | 0.25489000  | 0.62077100  |
| C  | 0.50333500  | 0.07774900  | -3.38445200 |
| H  | 0.20024300  | 1.11240400  | -3.56959900 |
| H  | 1.26937100  | -0.18961100 | -4.12533000 |
| H  | -0.36546800 | -0.56237400 | -3.55865600 |
| C  | -0.30160200 | -2.18041600 | -1.20207100 |
| H  | -0.95974100 | -2.00714700 | -2.05719500 |
| H  | 0.20380000  | -3.14331000 | -1.35911900 |
| H  | -0.93534500 | -2.28412500 | -0.31487600 |
| C  | 1.48457100  | -1.70770900 | 1.37917200  |
| H  | 0.48541400  | -2.09869300 | 1.59515300  |
| H  | 2.15072000  | -2.57051300 | 1.23656600  |
| H  | 1.83085600  | -1.17086800 | 2.26746300  |
| C  | -4.91699200 | -0.38006400 | 0.74989800  |
| C  | -3.67342200 | -0.03543900 | 1.28143000  |
| C  | -2.79384500 | 0.76031300  | 0.54211600  |
| C  | -3.13376200 | 1.21208100  | -0.75163500 |
| C  | -4.38742900 | 0.85121400  | -1.26017400 |
| C  | -5.27329900 | 0.06428700  | -0.52456100 |
| H  | -5.59997900 | -0.99502600 | 1.33003900  |
| H  | -3.37222600 | -0.37620300 | 2.26818600  |
| H  | -4.64116700 | 1.21792800  | -2.24905100 |
| H  | -6.23933300 | -0.20119100 | -0.94527300 |

|   |             |            |             |
|---|-------------|------------|-------------|
| C | -2.26139400 | 2.07939100 | -1.65573500 |
| O | -2.75020700 | 2.50172500 | -2.71091400 |
| N | -1.00773200 | 2.39327900 | -1.20096400 |
| O | -0.27635500 | 3.13657900 | -2.17200200 |
| C | -0.59716400 | 4.51881100 | -2.09663300 |
| H | 0.05726500  | 5.01245700 | -2.82250100 |
| H | -1.64340800 | 4.69282500 | -2.36793700 |
| H | -0.39322500 | 4.91799400 | -1.09251200 |
| N | -1.50852200 | 1.07698300 | 1.04582600  |
| C | -1.19342200 | 2.21653000 | 1.59929400  |
| C | -2.15907800 | 3.29632800 | 1.98658700  |
| H | -2.04707700 | 4.12767400 | 1.27933900  |
| H | -3.19597400 | 2.95406900 | 1.95940200  |
| H | -1.92138100 | 3.67883700 | 2.98534900  |
| C | 0.26270600  | 2.38067500 | 1.53709800  |
| H | 0.62078700  | 3.40999900 | 1.48658700  |
| H | 0.81356100  | 1.78919600 | 2.27129400  |

#### INT-7d

|    |             |             |             |
|----|-------------|-------------|-------------|
| Rh | 0.29972600  | 0.95295900  | -0.09668200 |
| C  | 1.46542500  | -0.80997100 | 0.34130400  |
| C  | 0.63791500  | -1.25176800 | -0.78624800 |
| C  | 0.94879800  | -0.44004000 | -1.88817600 |
| C  | 2.00838700  | 0.49336700  | -1.48813400 |
| C  | 2.38715000  | 0.19422600  | -0.14887800 |
| C  | 2.66301800  | 1.47734000  | -2.41331100 |
| H  | 3.34292800  | 0.96885600  | -3.11171300 |
| H  | 1.92183200  | 2.01891400  | -3.00980000 |
| H  | 3.24729400  | 2.21886500  | -1.86179700 |
| C  | 3.53063900  | 0.78814000  | 0.62019200  |
| H  | 3.77050500  | 1.79721300  | 0.27339700  |
| H  | 3.30534600  | 0.84975000  | 1.68858500  |
| H  | 4.43443600  | 0.17313700  | 0.50603300  |
| C  | 0.33487800  | -0.47182800 | -3.25753600 |
| H  | 0.11495100  | 0.53792300  | -3.62046600 |
| H  | 1.01719400  | -0.93655800 | -3.98270700 |
| H  | -0.60083000 | -1.03683500 | -3.26997900 |
| C  | -0.37334000 | -2.35737200 | -0.71187900 |
| H  | -0.97414100 | -2.41631600 | -1.62320300 |
| H  | 0.12021500  | -3.32897800 | -0.57375400 |
| H  | -1.06408800 | -2.21700400 | 0.12708700  |
| C  | 1.52682400  | -1.49616700 | 1.67407200  |
| H  | 0.53136900  | -1.80658800 | 2.00524500  |
| H  | 2.15842800  | -2.39517200 | 1.62418200  |



|   |             |             |             |
|---|-------------|-------------|-------------|
| H | 1.94270800  | -0.84004000 | 2.44390900  |
| C | -4.53253300 | -0.74934200 | 0.13817000  |
| C | -3.39937200 | -0.32957000 | 0.82961300  |
| C | -2.64160800 | 0.76383500  | 0.36640400  |
| C | -3.05046000 | 1.38931000  | -0.83815200 |
| C | -4.19519900 | 0.96481700  | -1.52399800 |
| C | -4.94519400 | -0.10044000 | -1.03549500 |
| H | -5.11233100 | -1.58558200 | 0.52208600  |
| H | -3.09113800 | -0.81193200 | 1.75278600  |
| H | -4.46605900 | 1.47323600  | -2.44450900 |
| H | -5.83627800 | -0.43133800 | -1.56081800 |
| C | -2.18759300 | 2.43256900  | -1.42613300 |
| O | -2.35384500 | 2.93782600  | -2.52483600 |
| N | -1.06075800 | 2.77373900  | -0.60970100 |
| O | -0.28008900 | 3.83442900  | -1.11935300 |
| C | -0.92861200 | 5.11662200  | -1.13373400 |
| H | -0.25811300 | 5.74346600  | -1.72681700 |
| H | -1.90304400 | 5.06634200  | -1.62249100 |
| H | -1.01724500 | 5.53618000  | -0.12611400 |
| N | -1.51283500 | 1.17961000  | 1.07417800  |
| C | -1.16346800 | 2.58964900  | 0.93827700  |
| C | -2.10520400 | 3.56922700  | 1.63861400  |
| H | -1.71532600 | 4.59089900  | 1.61981100  |
| H | -3.10748600 | 3.56272000  | 1.19507600  |
| H | -2.19330100 | 3.25810900  | 2.68432800  |
| C | 0.30558200  | 2.50893100  | 1.30051300  |
| H | 0.92243600  | 3.36538900  | 1.02655400  |
| H | 0.46143600  | 2.16717700  | 2.32398400  |

### INT-8d

|    |            |             |             |
|----|------------|-------------|-------------|
| Rh | 0.54033600 | 0.42315300  | 0.61312600  |
| C  | 2.11971100 | -0.95362300 | -0.19539800 |
| C  | 1.03638400 | -0.76574400 | -1.16252300 |
| C  | 1.04386700 | 0.60541300  | -1.58241400 |
| C  | 2.01302400 | 1.29995100  | -0.78207900 |
| C  | 2.71009700 | 0.30998700  | 0.03987500  |
| C  | 2.42419800 | 2.73330300  | -0.93978400 |
| H  | 3.19852500 | 2.81993200  | -1.71543900 |
| H  | 1.58196700 | 3.36562400  | -1.23211600 |
| H  | 2.84480000 | 3.13244900  | -0.01191100 |
| C  | 3.83429500 | 0.63397100  | 0.97649300  |
| H  | 3.58085700 | 1.48636700  | 1.61489800  |
| H  | 4.07479000 | -0.20910000 | 1.62851100  |
| H  | 4.73964600 | 0.89511800  | 0.41286900  |

|   |             |             |             |
|---|-------------|-------------|-------------|
| C | 0.24075900  | 1.17903200  | -2.70608900 |
| H | 0.13573400  | 2.26307400  | -2.63730400 |
| H | 0.74173900  | 0.94877900  | -3.65714200 |
| H | -0.76240400 | 0.74954300  | -2.75257600 |
| C | 0.20205200  | -1.86518200 | -1.74488300 |
| H | -0.76518200 | -1.49432700 | -2.09122000 |
| H | 0.71841500  | -2.32356300 | -2.60025800 |
| H | 0.01257500  | -2.65187600 | -1.00900900 |
| C | 2.48176500  | -2.26933300 | 0.42375800  |
| H | 1.59106000  | -2.78959100 | 0.78944100  |
| H | 2.97066900  | -2.91922800 | -0.31419000 |
| H | 3.16505900  | -2.14574400 | 1.26752100  |
| C | -3.64160200 | -1.31720200 | -0.58475000 |
| C | -2.67448400 | -0.67691900 | 0.17690900  |
| C | -2.31787900 | 0.66977500  | -0.08649400 |
| C | -2.95469900 | 1.31414300  | -1.18476700 |
| C | -3.93231300 | 0.65084200  | -1.94192900 |
| C | -4.28855500 | -0.65729400 | -1.64513600 |
| H | -3.91411700 | -2.34231000 | -0.34288400 |
| H | -2.19504900 | -1.17779200 | 1.01110600  |
| H | -4.37570800 | 1.18563700  | -2.77665200 |
| H | -5.05098700 | -1.16723900 | -2.22722400 |
| C | -2.45830000 | 2.63281400  | -1.64794000 |
| O | -2.64088300 | 3.07600100  | -2.78431700 |
| N | -1.70901200 | 3.28747800  | -0.70069500 |
| O | -0.86107300 | 4.30314700  | -1.15879900 |
| C | -1.56450300 | 5.54233300  | -1.32539400 |
| H | -0.80671600 | 6.25164400  | -1.66975100 |
| H | -2.34893000 | 5.43170200  | -2.07710900 |
| H | -1.98595500 | 5.88696200  | -0.37289000 |
| N | -1.39474500 | 1.32788500  | 0.71803100  |
| C | -1.55984400 | 2.78318700  | 0.70276000  |
| C | -2.86046100 | 3.12851700  | 1.47720700  |
| H | -3.02262400 | 4.21229200  | 1.47687000  |
| H | -3.73356900 | 2.64988900  | 1.02731800  |
| H | -2.77068300 | 2.78319300  | 2.51171500  |
| C | -0.40129000 | 3.50629800  | 1.38847100  |
| H | 0.54301300  | 3.35268000  | 0.86745700  |
| H | -0.59705600 | 4.58095100  | 1.43766200  |
| C | 0.10948300  | -0.04964100 | 3.09738600  |
| O | -0.21943900 | -0.90876000 | 2.21925900  |
| O | 0.73697300  | 0.99753700  | 2.73711500  |
| H | -0.30055700 | 3.11059200  | 2.39936500  |
| C | -0.27366000 | -0.24948500 | 4.54226400  |

|   |             |             |            |
|---|-------------|-------------|------------|
| H | 0.43108200  | 0.26238000  | 5.20204500 |
| H | -1.27041100 | 0.17800500  | 4.70438000 |
| H | -0.31783900 | -1.31466600 | 4.78249300 |

**TS-4d**

|    |             |             |             |
|----|-------------|-------------|-------------|
| Rh | 0.15062500  | 1.12816000  | -0.52891500 |
| C  | 1.42148200  | -0.69785100 | 0.09905900  |
| C  | 0.69837300  | -0.83334700 | -1.15801800 |
| C  | 1.30784200  | 0.07796400  | -2.13086900 |
| C  | 2.24471300  | 0.86692000  | -1.43498600 |
| C  | 2.32233400  | 0.37331500  | -0.04978600 |
| C  | 3.09777500  | 1.95841500  | -2.00870000 |
| H  | 4.04206100  | 1.55602000  | -2.40174500 |
| H  | 2.58240300  | 2.46797700  | -2.82711600 |
| H  | 3.35055500  | 2.70778800  | -1.25241800 |
| C  | 3.27913600  | 0.91644100  | 0.96760600  |
| H  | 3.16947100  | 2.00017000  | 1.08351900  |
| H  | 3.13539800  | 0.46034400  | 1.94950600  |
| H  | 4.31406300  | 0.72309400  | 0.65520800  |
| C  | 0.97465300  | 0.15332000  | -3.58940000 |
| H  | 1.00835300  | 1.18325000  | -3.95012500 |
| H  | 1.68720700  | -0.44768200 | -4.17090400 |
| H  | -0.02913400 | -0.22874700 | -3.79134300 |
| C  | -0.29507400 | -1.91170500 | -1.46354400 |
| H  | -0.96948300 | -1.62057000 | -2.27306400 |
| H  | 0.22248000  | -2.83203300 | -1.77110000 |
| H  | -0.90456000 | -2.14612300 | -0.58667800 |
| C  | 1.15497300  | -1.52927700 | 1.31905700  |
| H  | 0.10371300  | -1.45709900 | 1.61876800  |
| H  | 1.38137300  | -2.58567100 | 1.12574500  |
| H  | 1.76357300  | -1.20862300 | 2.16834200  |
| C  | -4.81348200 | -0.13859700 | 1.14293600  |
| C  | -3.50080900 | 0.18551300  | 1.46187600  |
| C  | -2.64692200 | 0.82160900  | 0.53246600  |
| C  | -3.17284500 | 1.14148000  | -0.74447900 |
| C  | -4.49936700 | 0.79080900  | -1.05113700 |
| C  | -5.31998800 | 0.15525900  | -0.12863500 |
| H  | -5.43803600 | -0.63751300 | 1.88041100  |
| H  | -3.09117300 | -0.06891000 | 2.43593800  |
| H  | -4.86539500 | 1.05937000  | -2.03653200 |
| H  | -6.34188600 | -0.10420400 | -0.39050800 |
| C  | -2.45042300 | 1.90571700  | -1.81470700 |
| O  | -3.02448800 | 2.25180300  | -2.84622500 |
| N  | -1.12009300 | 2.24297600  | -1.56374800 |

|   |             |            |             |
|---|-------------|------------|-------------|
| O | -0.50588500 | 2.79238700 | -2.72160900 |
| C | -0.65970400 | 4.20935500 | -2.72458100 |
| H | -0.10845600 | 4.55920400 | -3.60283200 |
| H | -1.71465400 | 4.48433300 | -2.81989600 |
| H | -0.23249300 | 4.65363700 | -1.81537600 |
| N | -1.31960600 | 1.06231200 | 0.91216100  |
| C | -1.06146900 | 1.98686000 | 1.93864900  |
| C | -2.11654200 | 3.03271100 | 2.24581800  |
| H | -2.37438300 | 3.59303000 | 1.33861100  |
| H | -3.04342700 | 2.58019100 | 2.61259100  |
| H | -1.75598300 | 3.73428600 | 3.00308600  |
| C | 0.11813000  | 2.00785100 | 2.60603600  |
| H | 0.32810800  | 2.78004100 | 3.33763000  |
| H | 0.88289000  | 1.25997200 | 2.43543400  |

**TS-5d**

|    |             |             |             |
|----|-------------|-------------|-------------|
| Rh | 0.29776300  | 0.96748600  | -0.05068900 |
| C  | 1.49615700  | -0.84121700 | 0.29302600  |
| C  | 0.65375900  | -1.19280600 | -0.84982300 |
| C  | 0.95281300  | -0.30252300 | -1.89853900 |
| C  | 2.00548300  | 0.60650600  | -1.43902800 |
| C  | 2.39281300  | 0.20851000  | -0.12169900 |
| C  | 2.66187300  | 1.64594200  | -2.30043800 |
| H  | 3.36931800  | 1.18267200  | -3.00318100 |
| H  | 1.92292600  | 2.19986400  | -2.88714000 |
| H  | 3.21725000  | 2.37210200  | -1.70037600 |
| C  | 3.53245100  | 0.76219400  | 0.68285700  |
| H  | 3.75842000  | 1.79530300  | 0.40442100  |
| H  | 3.31220900  | 0.74731400  | 1.75419900  |
| H  | 4.44314400  | 0.16792200  | 0.52306200  |
| C  | 0.31950500  | -0.22673800 | -3.25802200 |
| H  | -0.06306800 | 0.77914700  | -3.46588500 |
| H  | 1.04714700  | -0.47147200 | -4.04340100 |
| H  | -0.51902300 | -0.92156300 | -3.35249700 |
| C  | -0.35876300 | -2.30117800 | -0.84235400 |
| H  | -0.96036900 | -2.30508900 | -1.75498300 |
| H  | 0.13356000  | -3.27982300 | -0.76285000 |
| H  | -1.04836000 | -2.21072100 | 0.00449300  |
| C  | 1.56892200  | -1.62182300 | 1.57304000  |
| H  | 0.57730600  | -1.95999200 | 1.88910200  |
| H  | 2.20207200  | -2.51338100 | 1.45564500  |
| H  | 1.98979800  | -1.02304600 | 2.38610600  |
| C  | -4.70218600 | -0.60682200 | 0.36990600  |
| C  | -3.55664000 | -0.19483100 | 1.05354600  |

|   |             |             |             |
|---|-------------|-------------|-------------|
| C | -2.69418800 | 0.75335300  | 0.48759300  |
| C | -2.99573300 | 1.26783800  | -0.79640400 |
| C | -4.14499400 | 0.84816200  | -1.47240400 |
| C | -5.00410200 | -0.08462700 | -0.89138700 |
| H | -5.36383300 | -1.33919800 | 0.82606500  |
| H | -3.31459100 | -0.59133500 | 2.03533000  |
| H | -4.33927700 | 1.25637500  | -2.45925100 |
| H | -5.89655300 | -0.40779400 | -1.41962500 |
| C | -2.07183800 | 2.22823600  | -1.47771600 |
| O | -2.25668100 | 2.61979300  | -2.62381100 |
| N | -0.97654400 | 2.64545700  | -0.69088400 |
| O | -0.17696000 | 3.64206500  | -1.29912600 |
| C | -0.82753000 | 4.91151800  | -1.42746300 |
| H | -0.08363700 | 5.54858600  | -1.91313900 |
| H | -1.71830900 | 4.84088900  | -2.05575800 |
| H | -1.07931300 | 5.33515300  | -0.44829900 |
| N | -1.51302000 | 1.13056900  | 1.15697600  |
| C | -1.17955200 | 2.47400400  | 1.14388800  |
| C | -2.14814800 | 3.53435100  | 1.62808500  |
| H | -1.74178600 | 4.53701000  | 1.47556200  |
| H | -3.12419600 | 3.45892800  | 1.13949000  |
| H | -2.29325100 | 3.38757400  | 2.70592200  |
| C | 0.29114800  | 2.47954400  | 1.40369300  |
| H | 0.82649200  | 3.39417700  | 1.14804700  |
| H | 0.54604800  | 2.08336500  | 2.38760200  |

**TS-6d**

|    |             |             |             |
|----|-------------|-------------|-------------|
| Rh | 0.40991200  | 0.60208800  | 0.52001600  |
| C  | 2.23828000  | -0.68346800 | 0.11044700  |
| C  | 1.13225300  | -1.06705400 | -0.76413600 |
| C  | 0.85830800  | 0.03496700  | -1.63696000 |
| C  | 1.67982800  | 1.14038300  | -1.22430600 |
| C  | 2.57261300  | 0.66285300  | -0.16877000 |
| C  | 1.78751000  | 2.46569200  | -1.92169500 |
| H  | 2.46718200  | 2.38864800  | -2.78195000 |
| H  | 0.82093800  | 2.82163400  | -2.28808800 |
| H  | 2.18804200  | 3.23778800  | -1.25906400 |
| C  | 3.66657500  | 1.47425100  | 0.46047900  |
| H  | 3.35852100  | 2.51291300  | 0.61264600  |
| H  | 3.96357800  | 1.07032700  | 1.43189000  |
| H  | 4.55641300  | 1.48734200  | -0.18369600 |
| C  | -0.08959100 | 0.02395500  | -2.79466700 |
| H  | -0.40068300 | 1.03095200  | -3.08099600 |
| H  | 0.40311100  | -0.43371000 | -3.66397400 |

|   |             |             |             |
|---|-------------|-------------|-------------|
| H | -0.99079600 | -0.55574500 | -2.57846800 |
| C | 0.51810700  | -2.43319300 | -0.83589000 |
| H | -0.50416700 | -2.38550400 | -1.22134300 |
| H | 1.09792900  | -3.09130400 | -1.49843400 |
| H | 0.48216000  | -2.90173400 | 0.15195900  |
| C | 2.86707600  | -1.59436100 | 1.12162100  |
| H | 2.10419900  | -2.06305700 | 1.75211200  |
| H | 3.42884600  | -2.39575700 | 0.62344400  |
| H | 3.56103500  | -1.05806500 | 1.77420000  |
| C | -3.85712500 | -0.82909900 | -1.54934900 |
| C | -2.95365300 | -0.45901300 | -0.56047700 |
| C | -2.44367500 | 0.85958300  | -0.51143200 |
| C | -2.84424600 | 1.76782700  | -1.52089400 |
| C | -3.75865300 | 1.38247900  | -2.50884500 |
| C | -4.27661900 | 0.09195000  | -2.52435700 |
| H | -4.25542800 | -1.84122100 | -1.55736800 |
| H | -2.64255100 | -1.15768800 | 0.21114000  |
| H | -4.02566100 | 2.11146500  | -3.26795000 |
| H | -4.99046700 | -0.20479700 | -3.28737200 |
| C | -2.18576900 | 3.09620800  | -1.61238200 |
| O | -2.21427700 | 3.79772500  | -2.62640300 |
| N | -1.53233100 | 3.46861200  | -0.46592700 |
| O | -0.77500700 | 4.64380900  | -0.50631400 |
| C | -1.60044400 | 5.81827200  | -0.50042100 |
| H | -0.89237000 | 6.65107800  | -0.48072300 |
| H | -2.20839500 | 5.86061700  | -1.40666500 |
| H | -2.23537600 | 5.85328300  | 0.39270500  |
| N | -1.58155700 | 1.23046100  | 0.50166300  |
| C | -1.41098700 | 2.65127400  | 0.78081700  |
| C | -2.46287900 | 3.11715700  | 1.80246200  |
| H | -2.33942600 | 4.18474300  | 2.01961100  |
| H | -3.47381400 | 2.94979800  | 1.41639100  |
| H | -2.34173600 | 2.55397800  | 2.73287400  |
| C | 0.02812000  | 2.72663100  | 1.33494000  |
| H | 0.72497600  | 3.17718200  | 0.63239200  |
| H | 0.08016800  | 3.35683900  | 2.23422300  |
| C | -0.11095300 | -0.03319900 | 3.36513700  |
| O | -0.13102900 | -0.62330700 | 2.25060700  |
| O | 0.16117000  | 1.20603100  | 3.50838700  |
| H | 0.25619600  | 1.73580900  | 2.34837100  |
| C | -0.43933100 | -0.81878200 | 4.61663100  |
| H | 0.30333100  | -0.61217200 | 5.39283400  |
| H | -1.41228000 | -0.48796400 | 4.99698500  |
| H | -0.48125800 | -1.88845300 | 4.40507200  |

## V. References

- [S1] Y. Fukui, P. Liu, Q. Liu, Z.-T. He, N. Wu, P. Tian and G.-Q. Lin, *J. Am. Chem. Soc.*, 2014, **136**, 15607.
- [S2] N. M. R. Capreti and I. D. Jurberg, *Org. Lett.*, 2015, **17**, 2490.
- [S3] D. Guin, B. Baruwati and S. V. Manorama, *Org. Lett.*, 2007, **9**, 1419.
- [S4] T. Ghosh, I. Mandal, S. J. Basak and J. Dash, *J. Org. Chem.*, 2021, **86**, 14695.
- [S5] M. J. Frisch, G. W. Trucks, H. B. Schlegel, G. E. Scuseria, M. A. Robb, J. R. Cheeseman, G. Scalmani, V. Barone, B. Mennucci, G. A. Petersson, H. Nakatsuji, M. Caricato, X. Li, H. P. Hratchian, A. F. Izmaylov, J. Bloino, G. Zheng, J. L. Sonnenberg, M. Hada, M. Ehara, K. Toyota, R. Fukuda, J. Hasegawa, M. Ishida, T. Nakajima, Y. Honda, O. Kitao, H. Nakai, T. Vreven, J. A. Montgomery, Jr., J. E. Peralta, F. Ogliaro, M. Bearpark, J. J. Heyd, E. Brothers, K. N. Kudin, V. N. Staroverov, T. Keith, R. Kobayashi, J. Normand, K. Raghavachari, A. Rendell, J. C. Burant, S. S. Iyengar, J. Tomasi, M. Cossi, N. Rega, J. M. Millam, M. Klene, J. E. Knox, J. B. Cross, V. Bakken, C. Adamo, J. Jaramillo, R. Gomperts, R. E. Stratmann, O. Yazyev, A. J. Austin, R. Cammi, C. Pomelli, J. W. Ochterski, R. L. Martin, K. Morokuma, V. G. Zakrzewski, G. A. Voth, P. Salvador, J. J. Dannenberg, S. Dapprich, A. D. Daniels, O. Farkas, J. B. Foresman, J. V. Ortiz, J. Cioslowski and D. J. Fox, Gaussian 09, Revision E.01, Gaussian, Inc.: Wallingford CT, 2013.
- [S6] (a) C. Lee, W. Yang and R. G. Parr, *Phys. Rev. B*, 1988, **37**, 785; (b) A. D. Becke, *J. Chem. Phys.*, 1993, **98**, 5648.
- [S7] (a) Y. Zhao and D. G. Truhlar, *Acc. Chem. Res.*, 2008, **41**, 157; (b) Y. Zhao and D. G. Truhlar, *Theor. Chim. Acta*, 2008, **120**, 215.
- [S8] M. Dolg, U. Wedig, H. Stoll and H. Preuss, *J. Chem. Phys.*, 1987, **86**, 866.
- [S9] A. V. Marenich, C. J. Cramer and D. G. Truhlar, *J. Phys. Chem. B*, 2009, **113**, 6378.

## VI. Copies of $^1\text{H}$ , $^{13}\text{C}$ and $^{19}\text{F}$ NMR spectra

### 3aa- $^1\text{H}$ NMR (400 MHz, $\text{DMSO-}d_6$ )

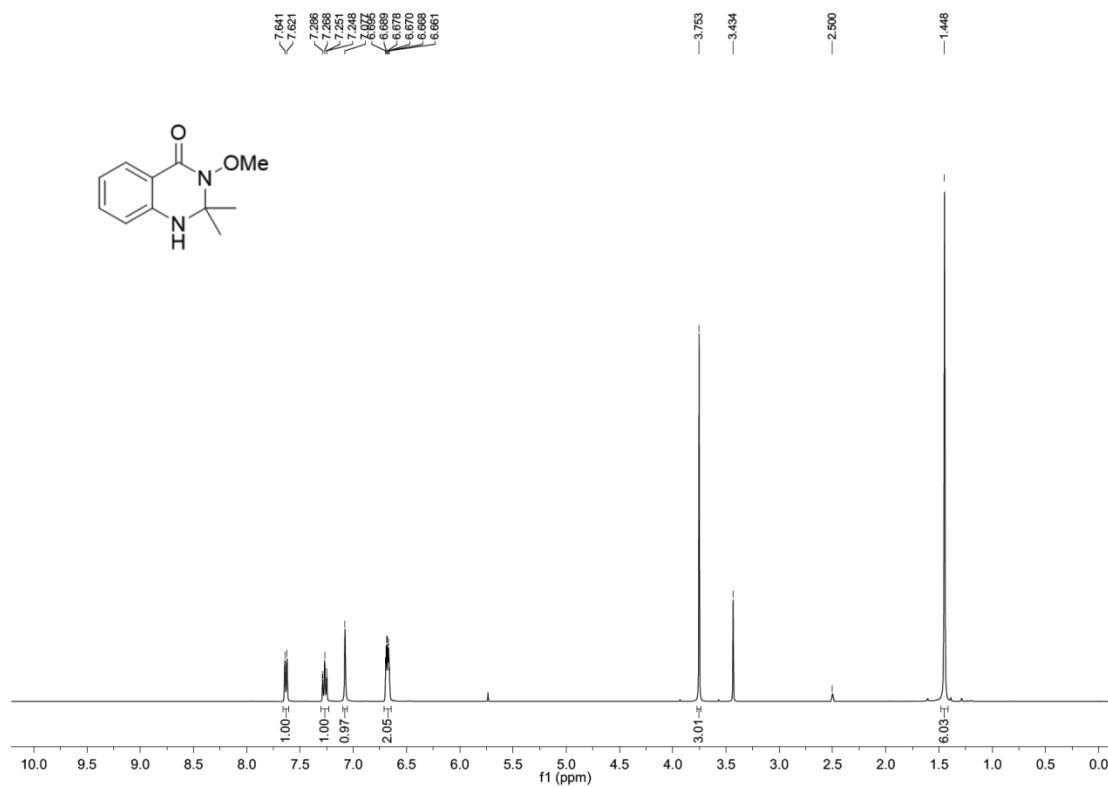

### 3aa- $^{13}\text{C}$ NMR (100 MHz, $\text{DMSO-}d_6$ )

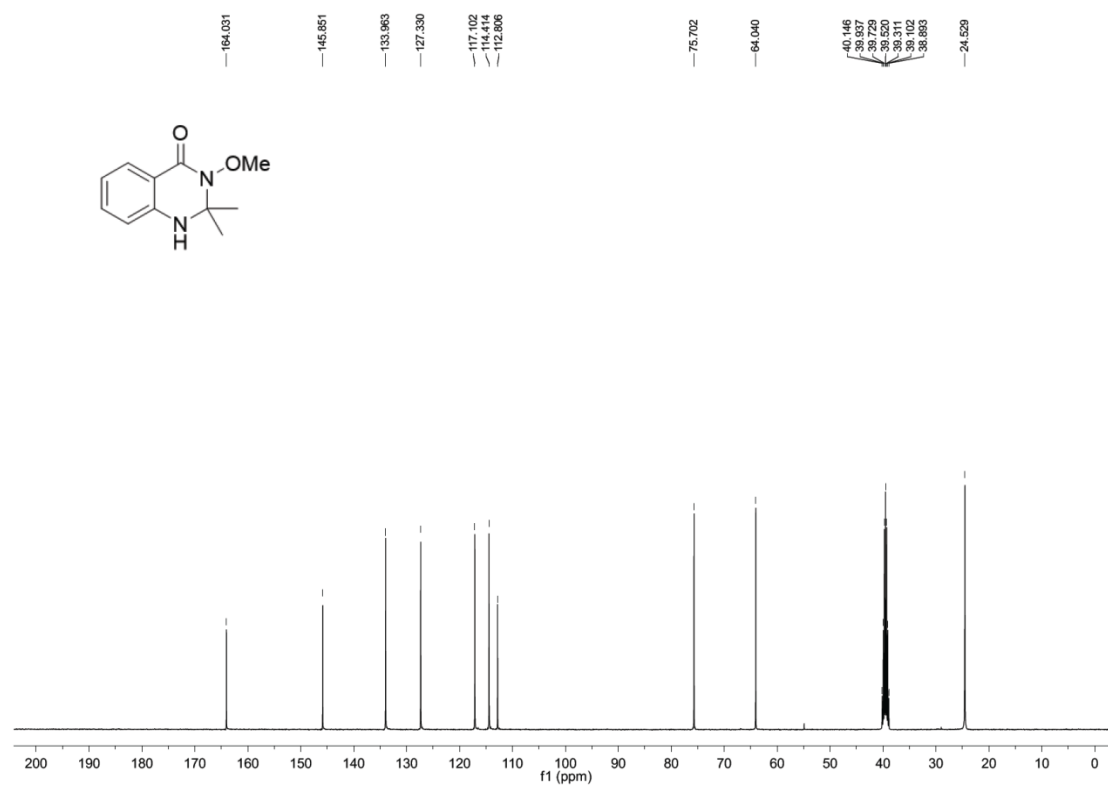



**3ba**-<sup>1</sup>H NMR (400 MHz, CD<sub>3</sub>OD)

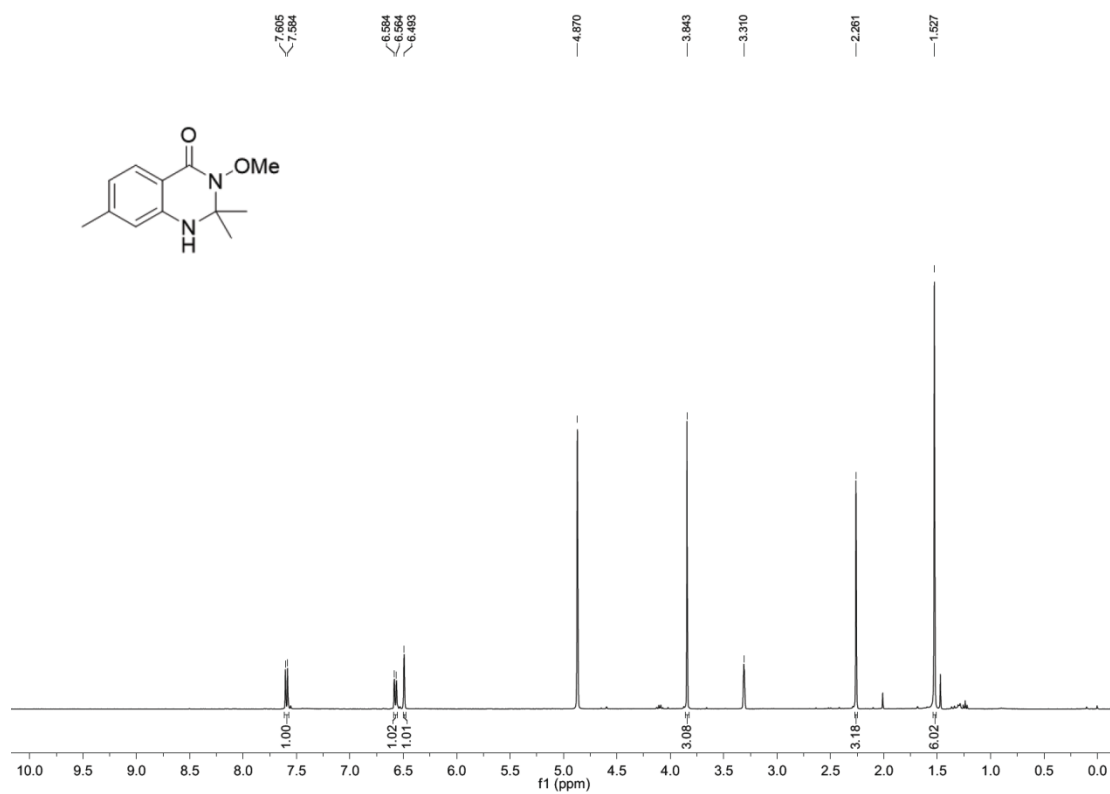

**3ba**-<sup>13</sup>C NMR (100 MHz, CD<sub>3</sub>OD)

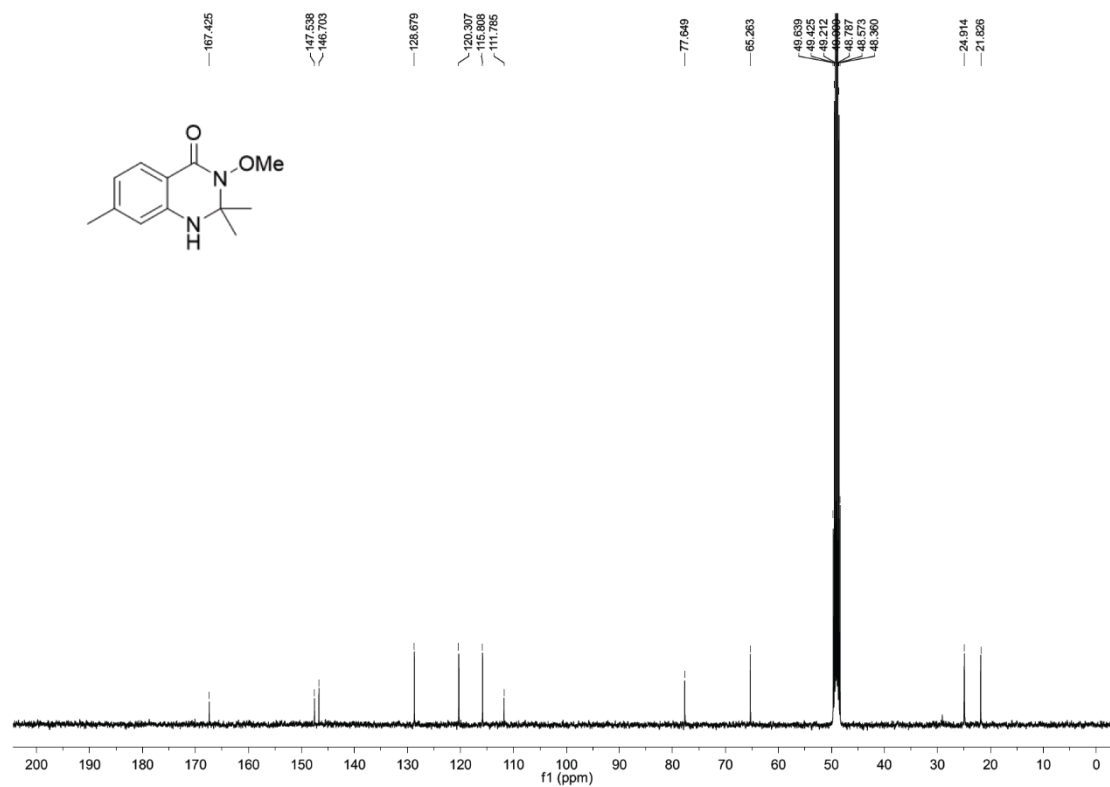

**3ca**-<sup>1</sup>H NMR (400 MHz, CD<sub>3</sub>OD)

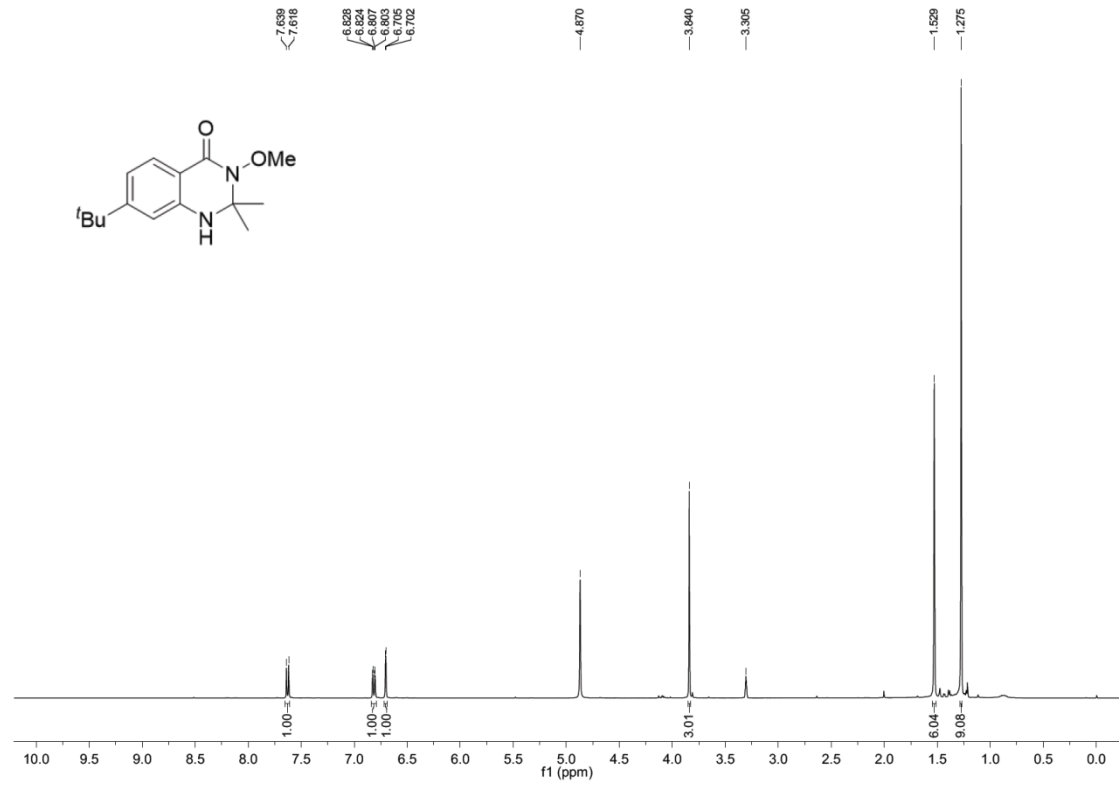

**3ca**-<sup>13</sup>C NMR (100 MHz, CD<sub>3</sub>OD)

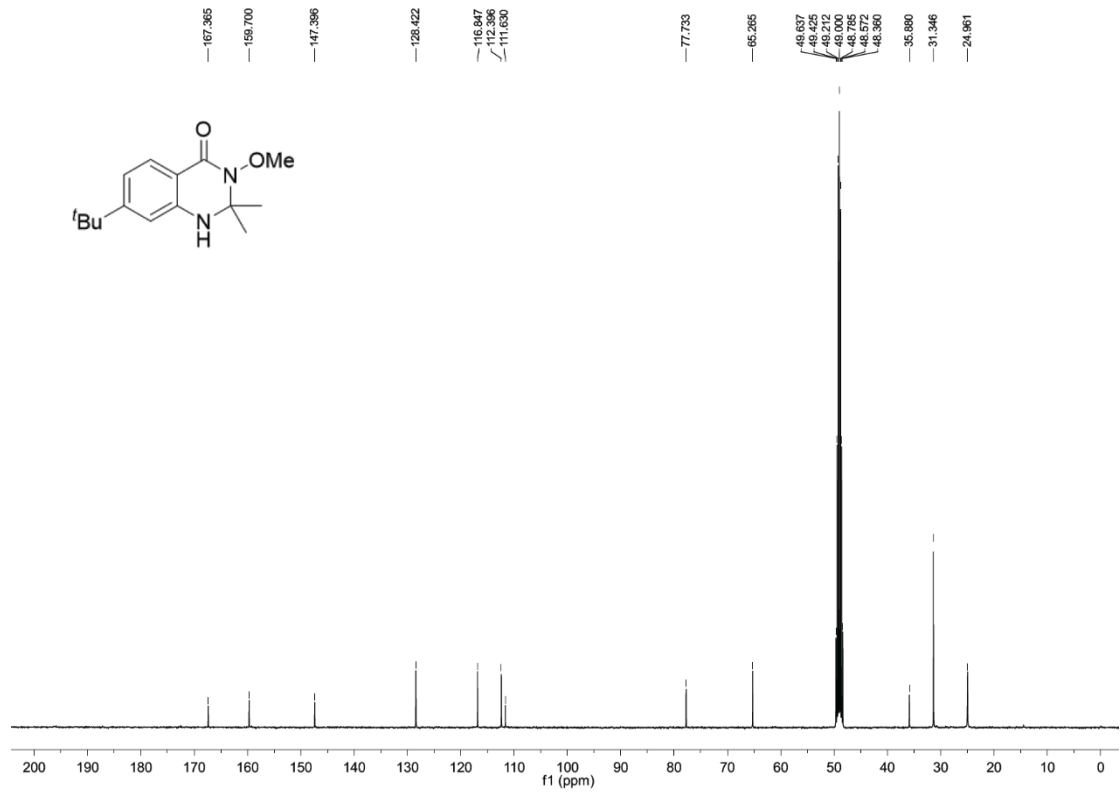

**3da-<sup>1</sup>H NMR (400 MHz, CD<sub>3</sub>OD)**

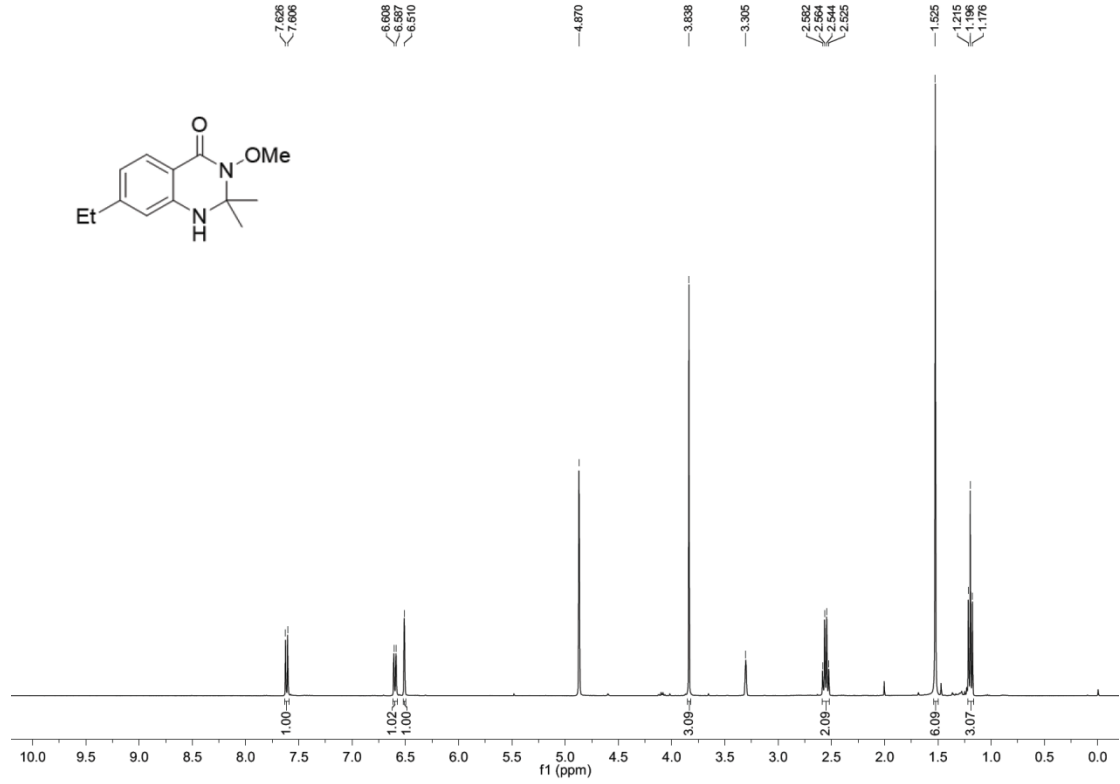

**3da-<sup>13</sup>C NMR (100 MHz, CD<sub>3</sub>OD)**

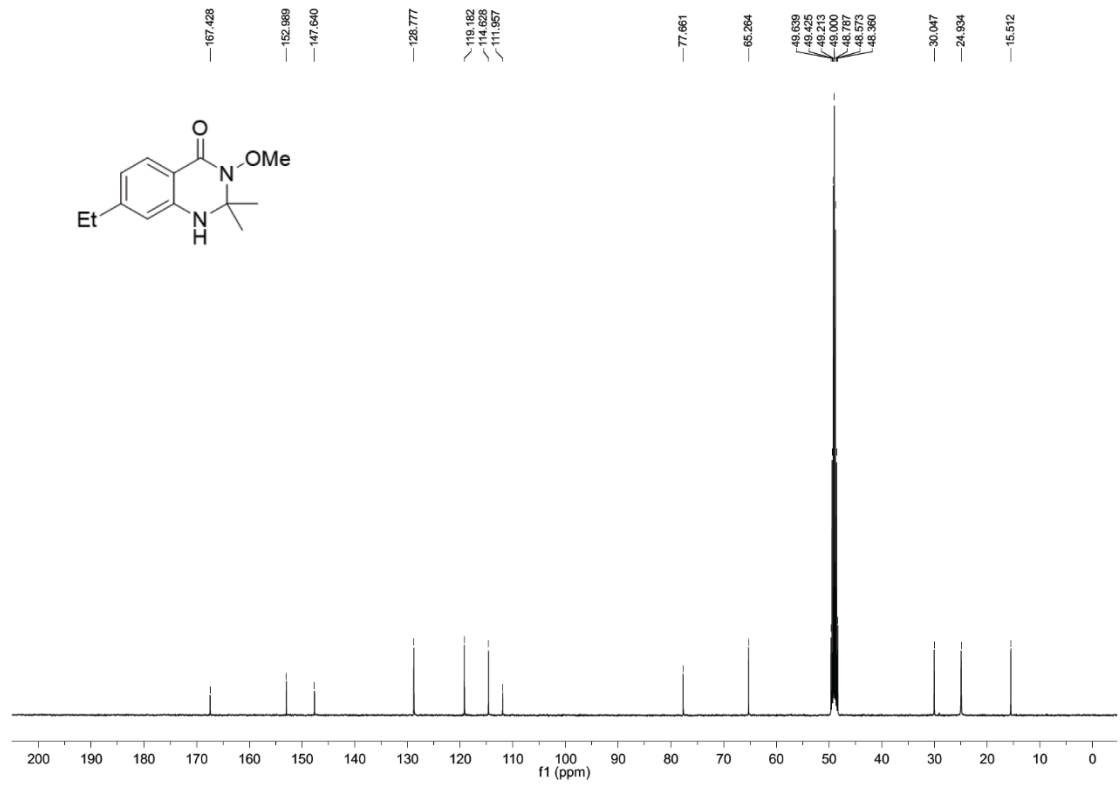

**3ea**-<sup>1</sup>H NMR (400 MHz, CD<sub>3</sub>OD)

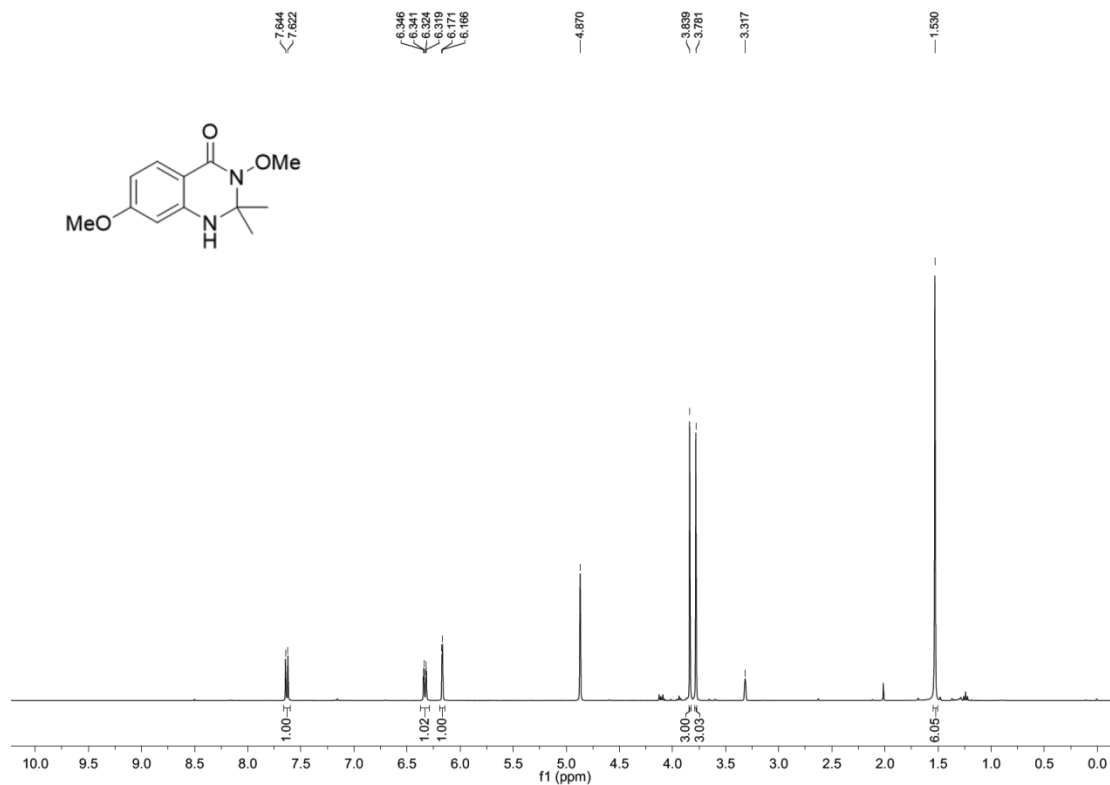

**3ea**-<sup>13</sup>C NMR (100 MHz, CD<sub>3</sub>OD)

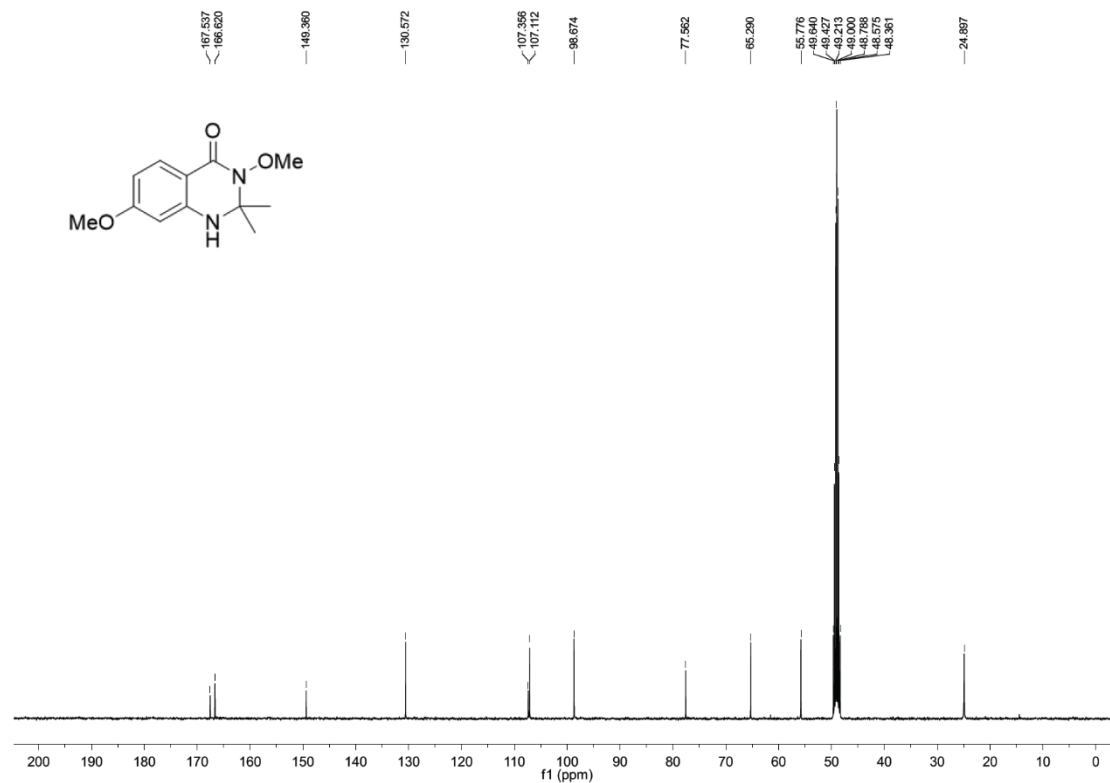

**3fa**-<sup>1</sup>H NMR (400 MHz, CDCl<sub>3</sub>)

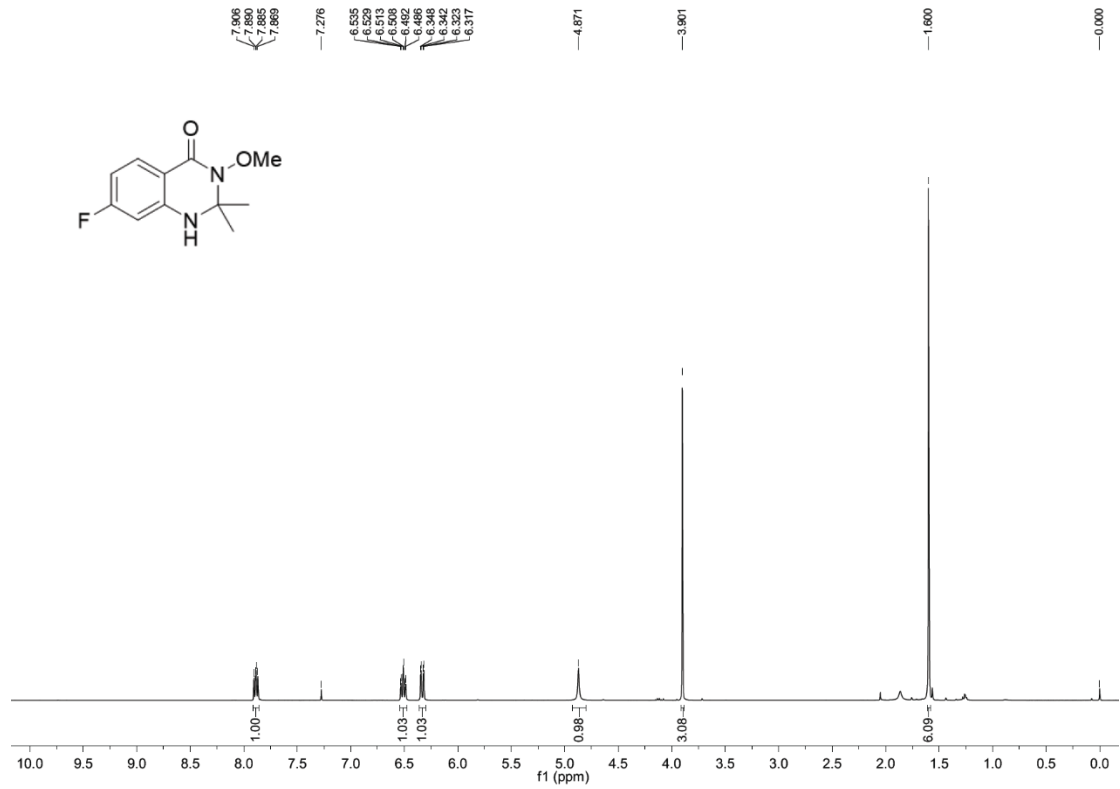

**3fa**-<sup>13</sup>C NMR (100 MHz, CDCl<sub>3</sub>)

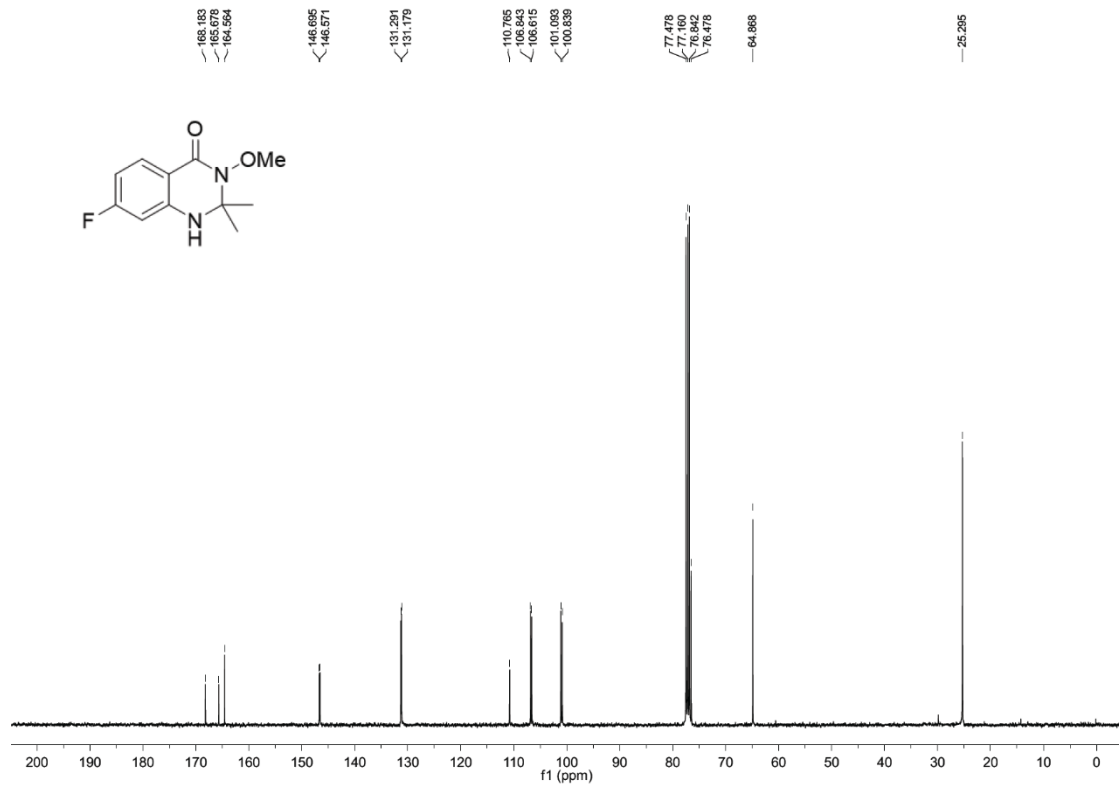

**3fa**-<sup>19</sup>F NMR (376 MHz, CDCl<sub>3</sub>)

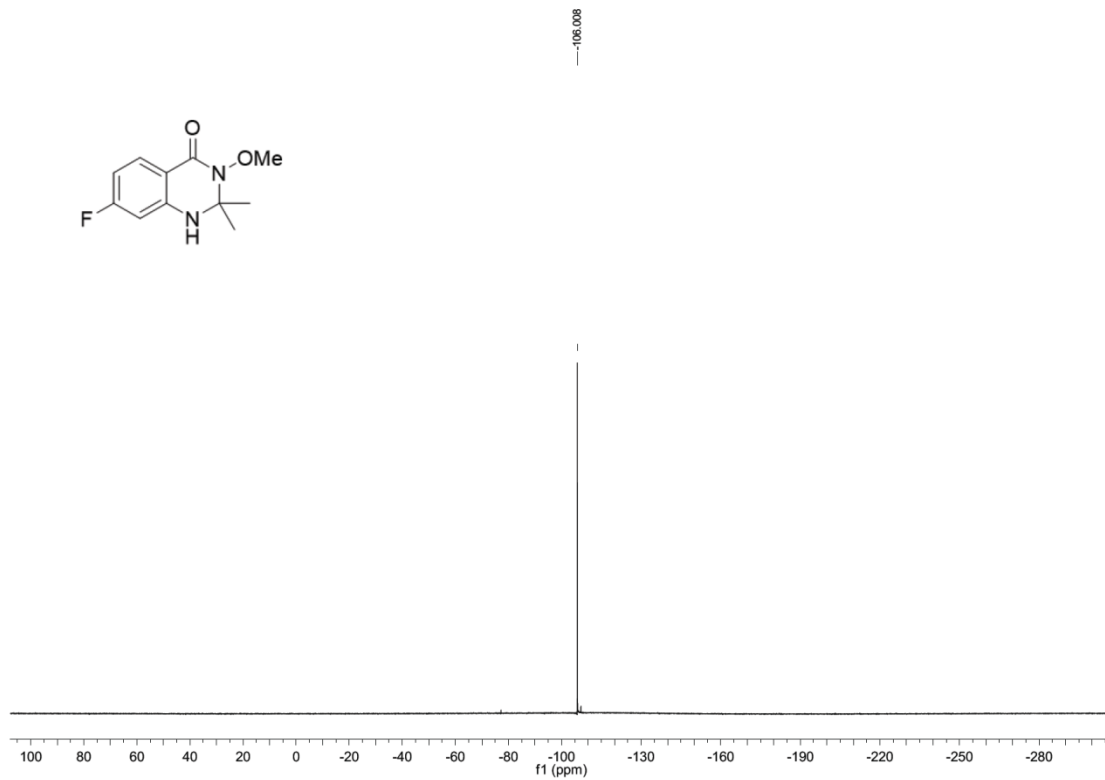

**3ga**-<sup>1</sup>H NMR (400 MHz, DMSO-*d*<sub>6</sub>)

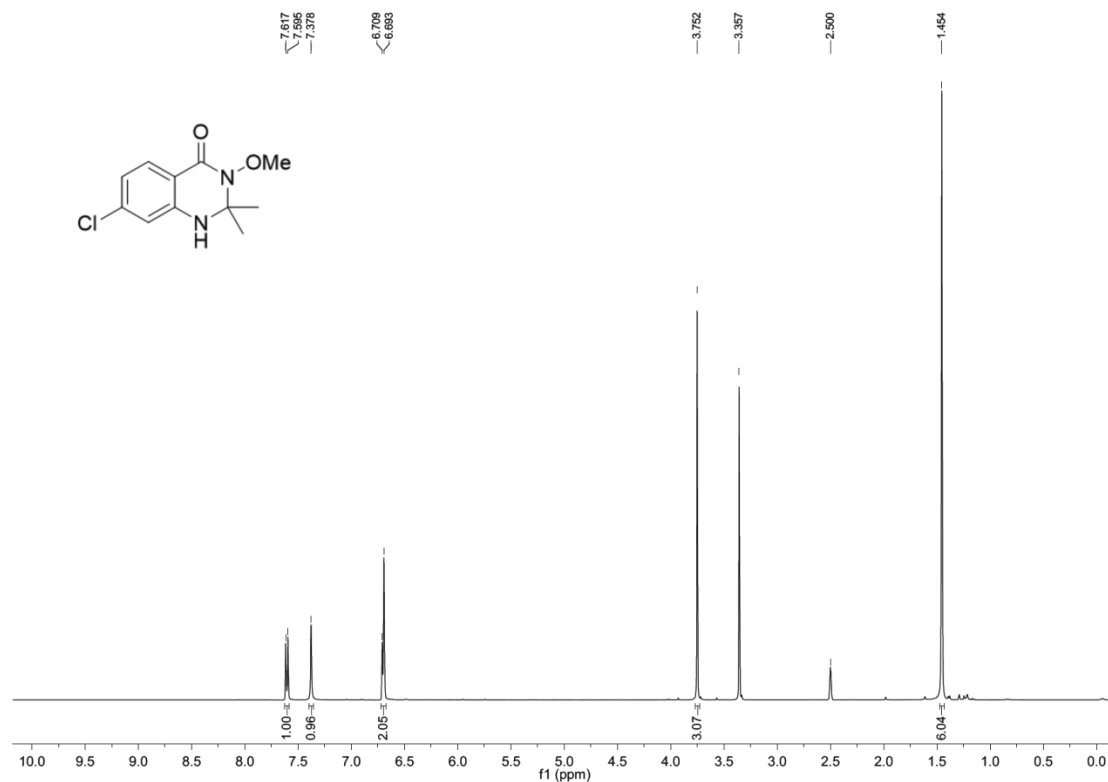

**3ga**-<sup>13</sup>C NMR (100 MHz, DMSO-*d*<sub>6</sub>)

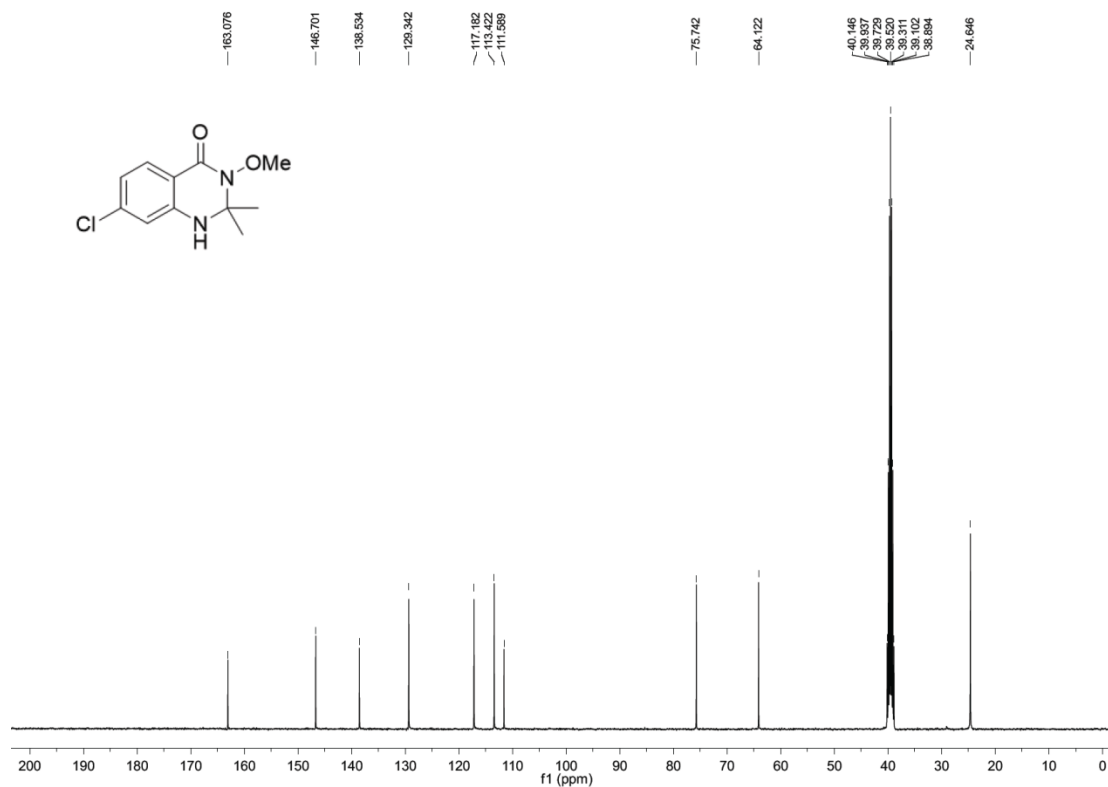

**3ha**-<sup>1</sup>H NMR (400 MHz, DMSO-*d*<sub>6</sub>)

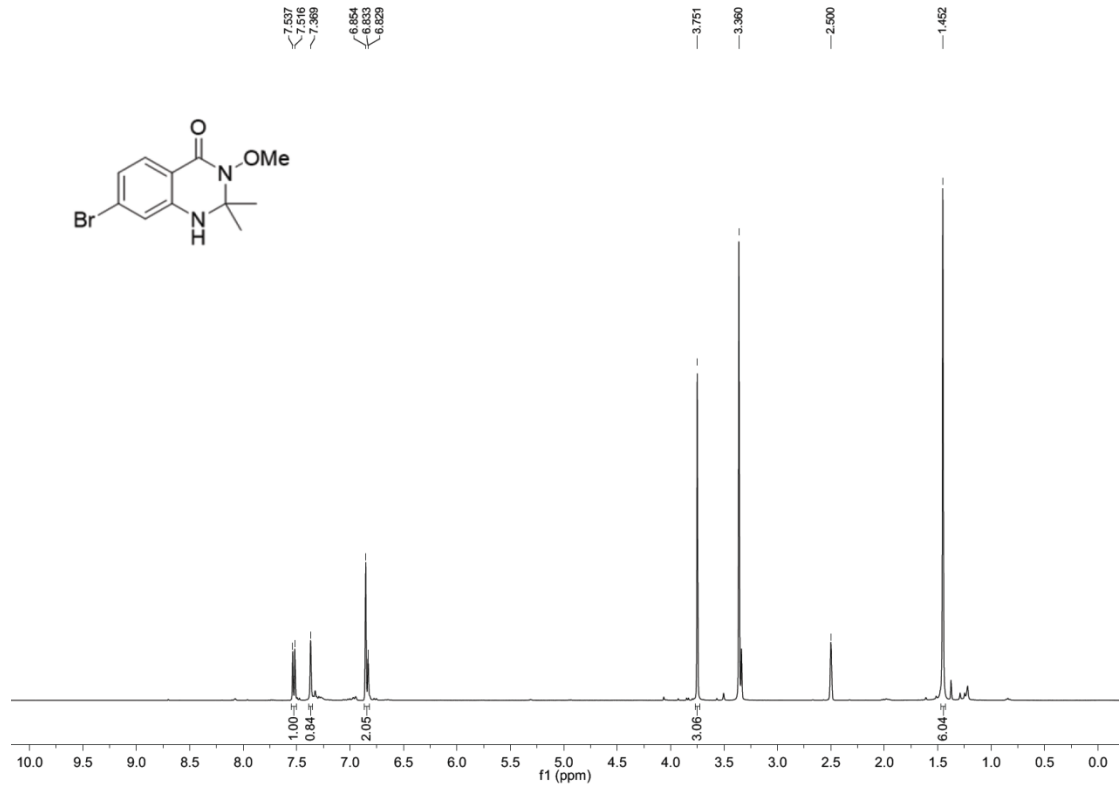

**3ha**-<sup>13</sup>C NMR (100 MHz, DMSO-*d*<sub>6</sub>)

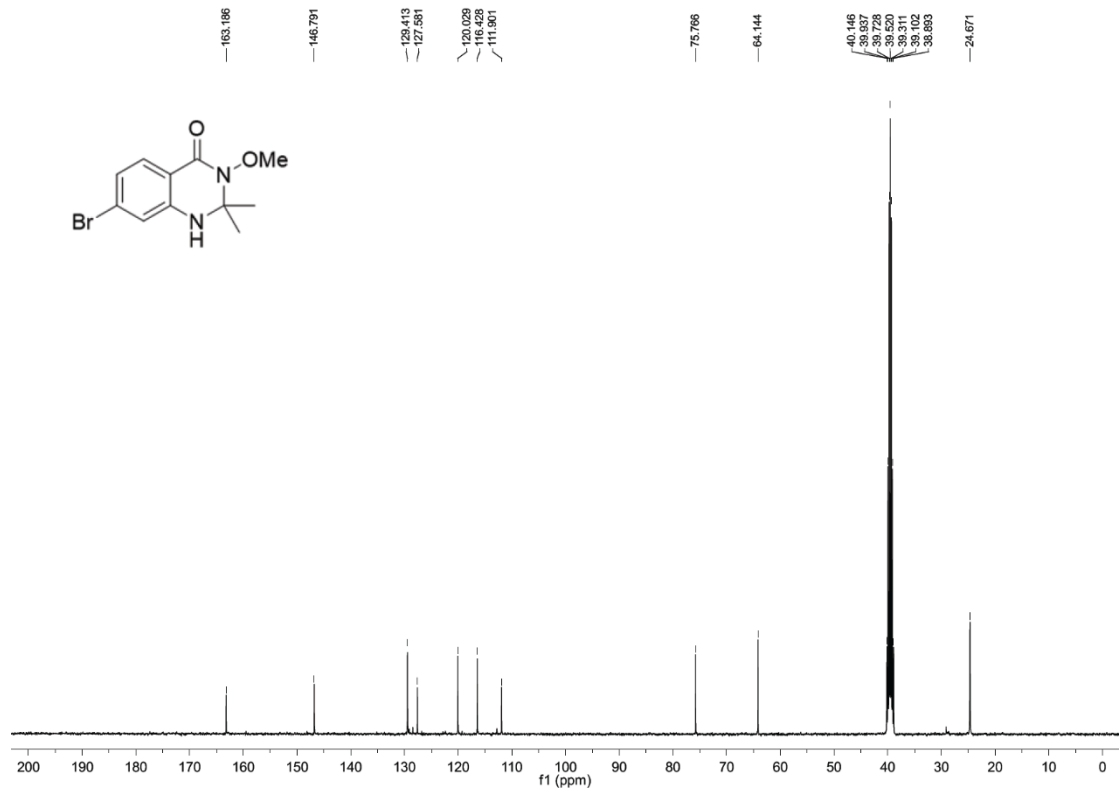



**3ia**-<sup>1</sup>H NMR (400 MHz, CD<sub>3</sub>OD)

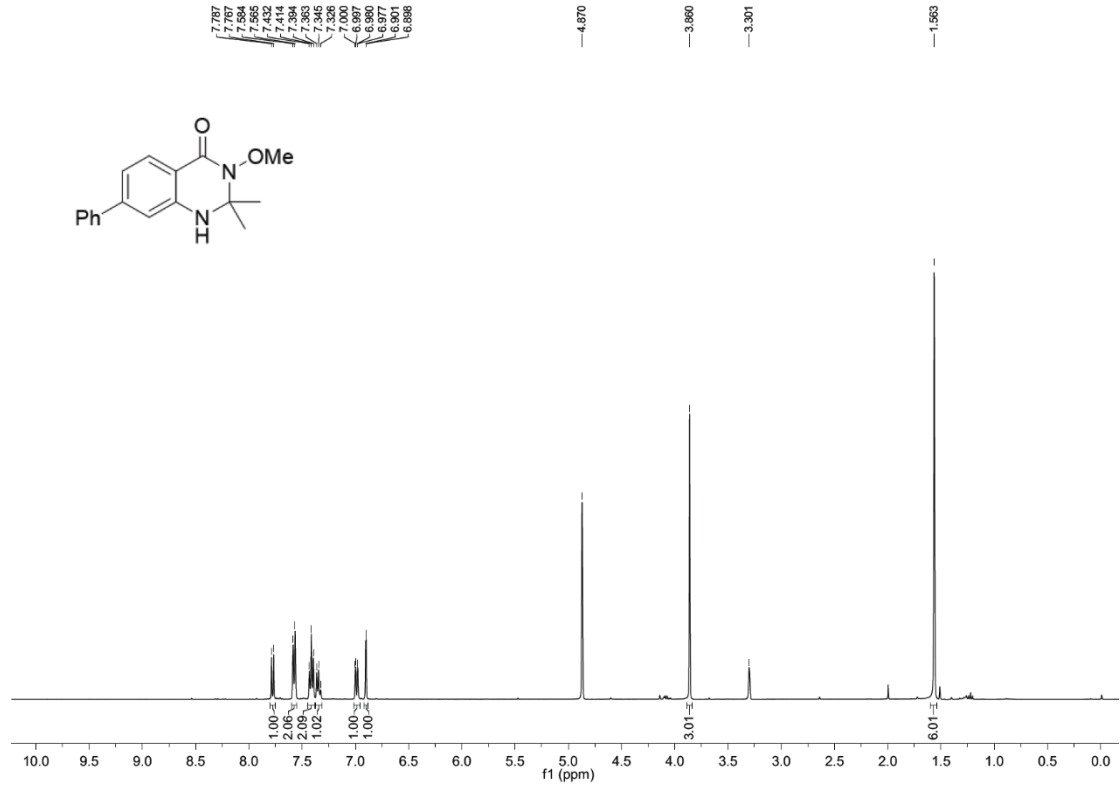

**3ia**-<sup>13</sup>C NMR (100 MHz, CD<sub>3</sub>OD)

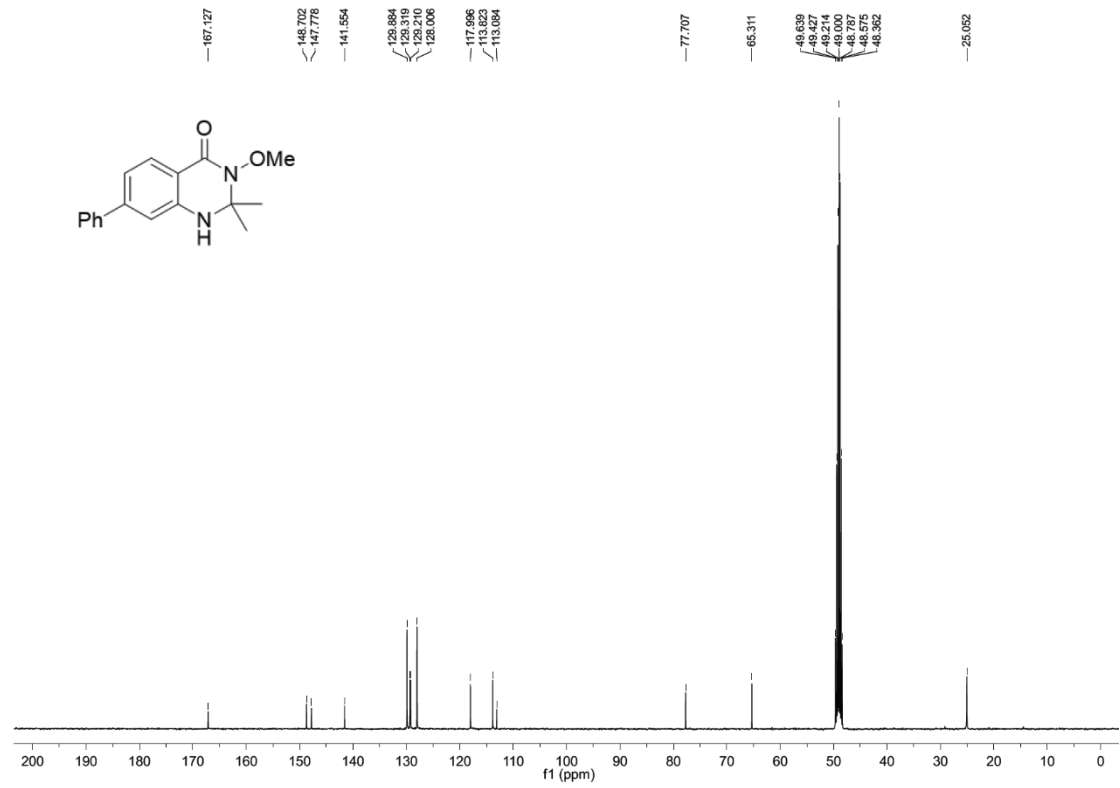

**3ja**-<sup>1</sup>H NMR (400 MHz, DMSO-*d*<sub>6</sub>)

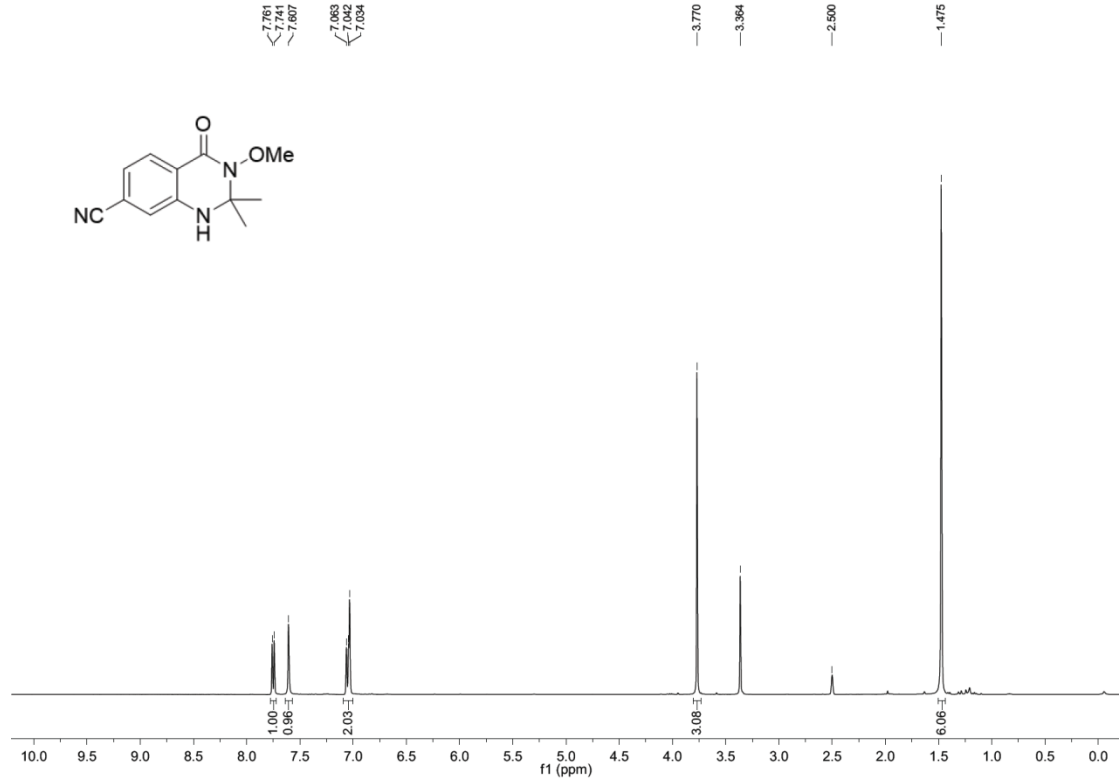

**3ja**-<sup>13</sup>C NMR (100 MHz, DMSO-*d*<sub>6</sub>)

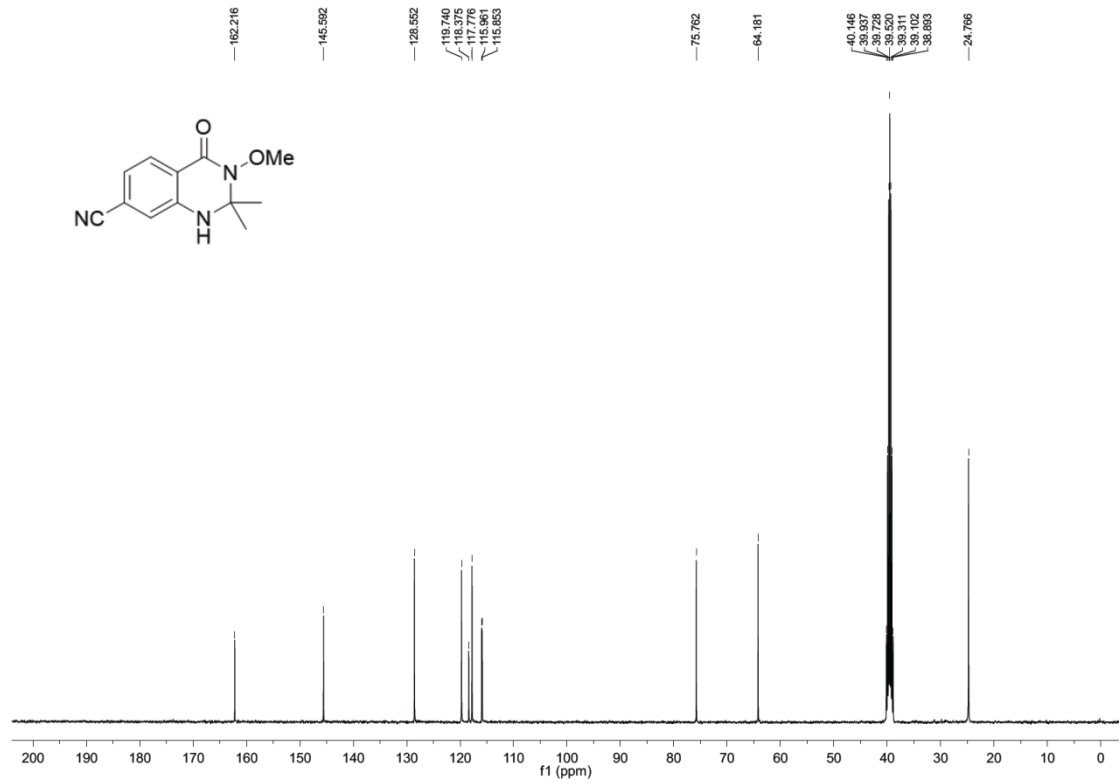

**3ka**-<sup>1</sup>H NMR (400 MHz, DMSO-*d*<sub>6</sub>)

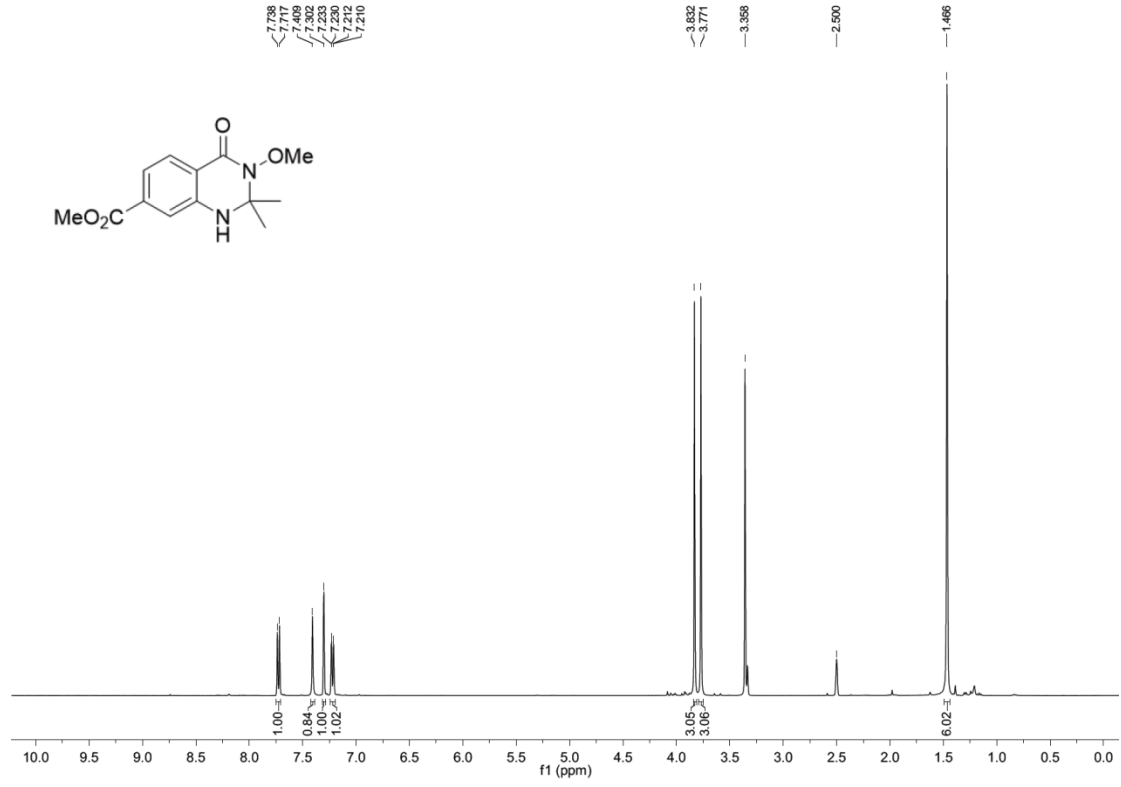

**3ka**-<sup>13</sup>C NMR (100 MHz, DMSO-*d*<sub>6</sub>)

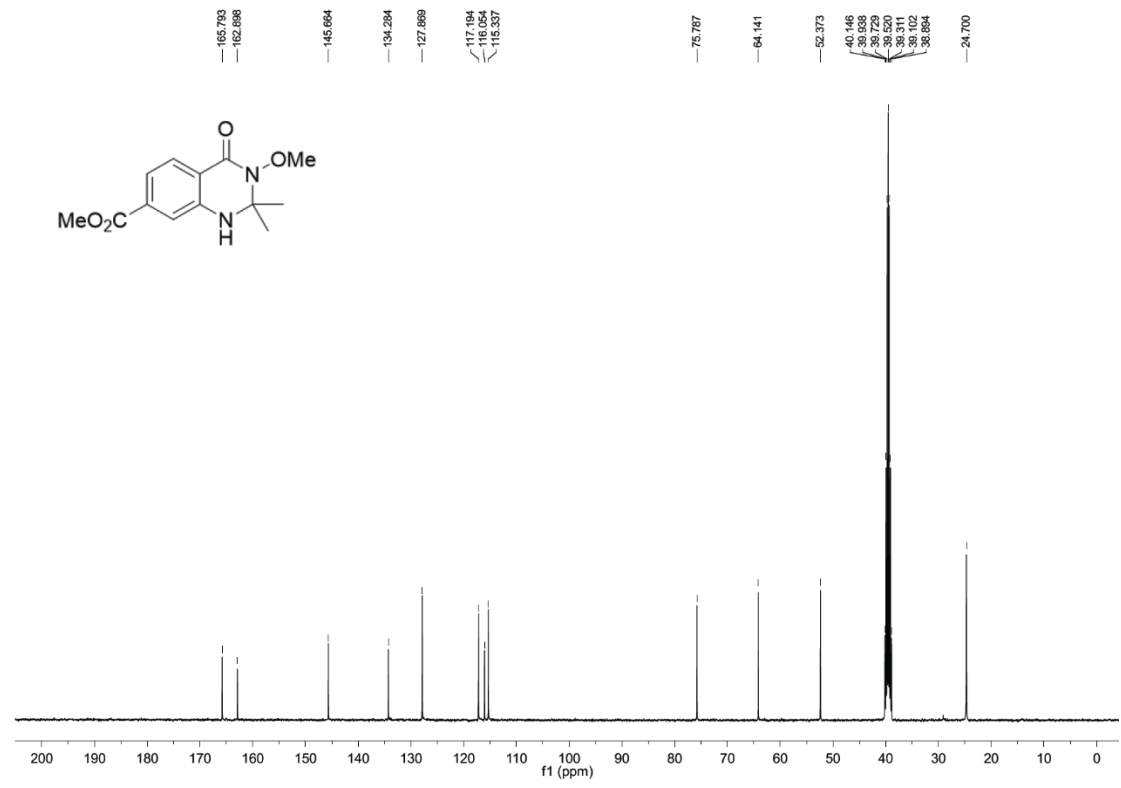

**3la**-<sup>1</sup>H NMR (400 MHz, DMSO-*d*<sub>6</sub>)

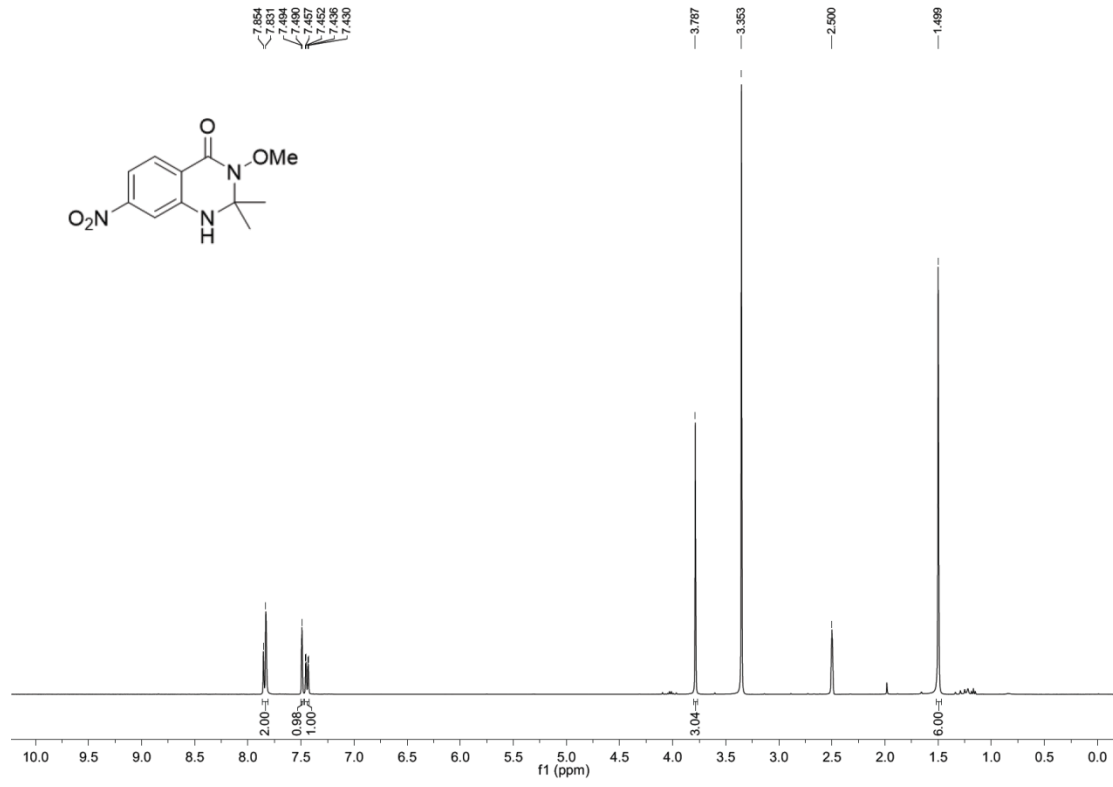

**3la**-<sup>13</sup>C NMR (100 MHz, DMSO-*d*<sub>6</sub>)

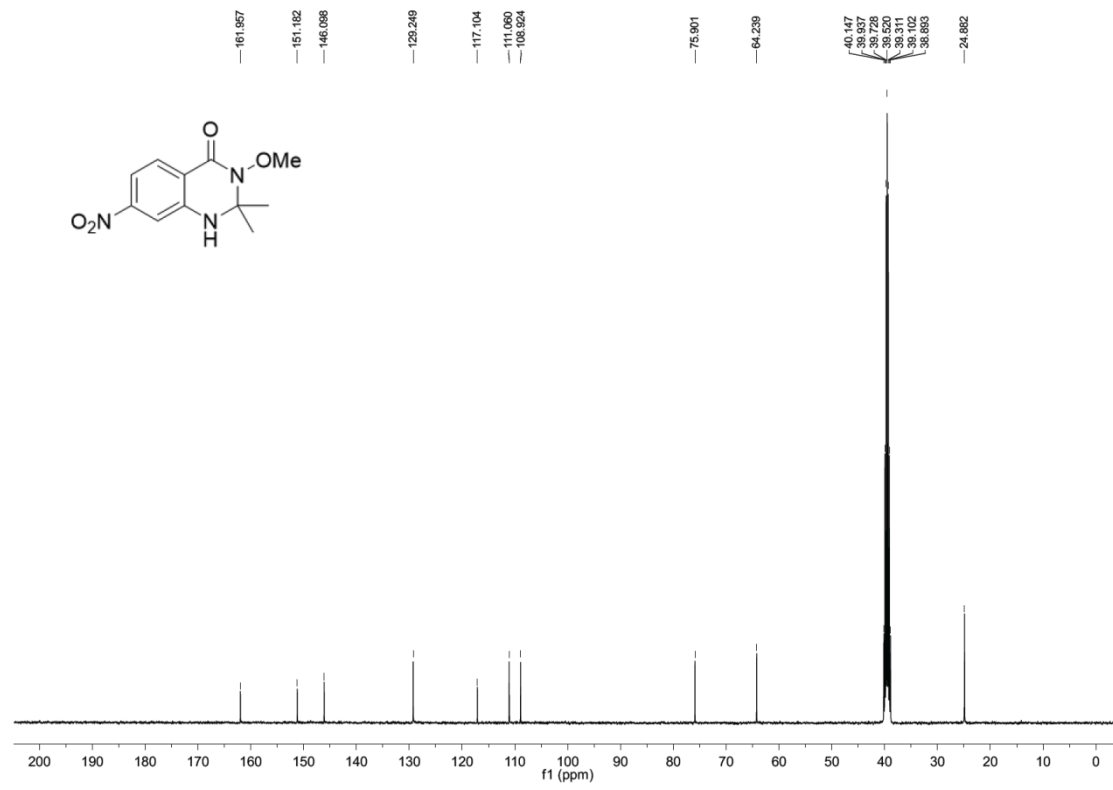

**3ma**-<sup>1</sup>H NMR (400 MHz, DMSO-*d*<sub>6</sub>)

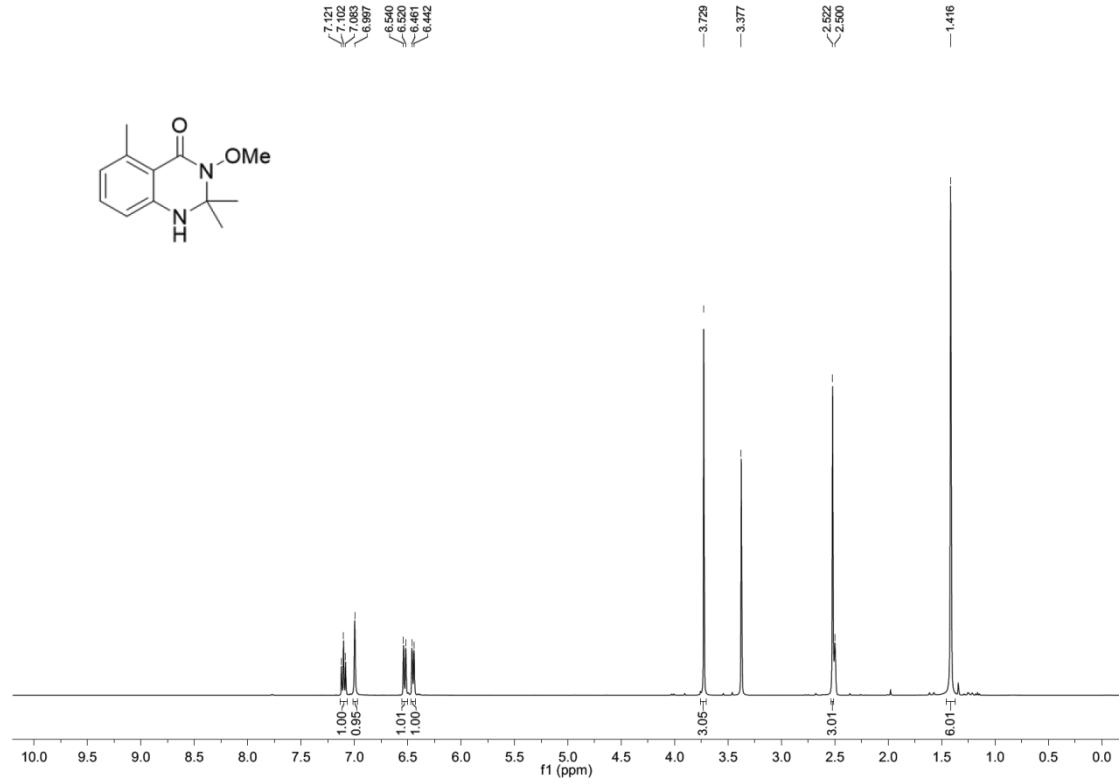

**3ma**-<sup>13</sup>C NMR (100 MHz, DMSO-*d*<sub>6</sub>)

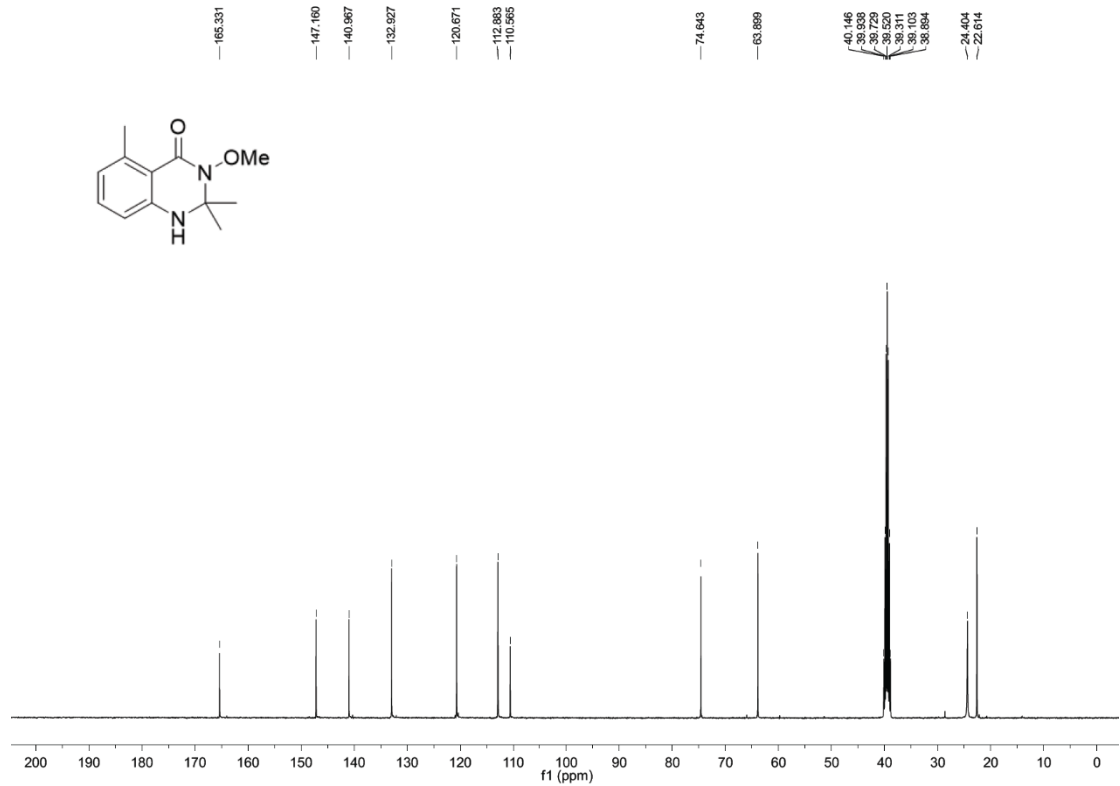

**3na**-<sup>1</sup>H NMR (400 MHz, DMSO-*d*<sub>6</sub>)

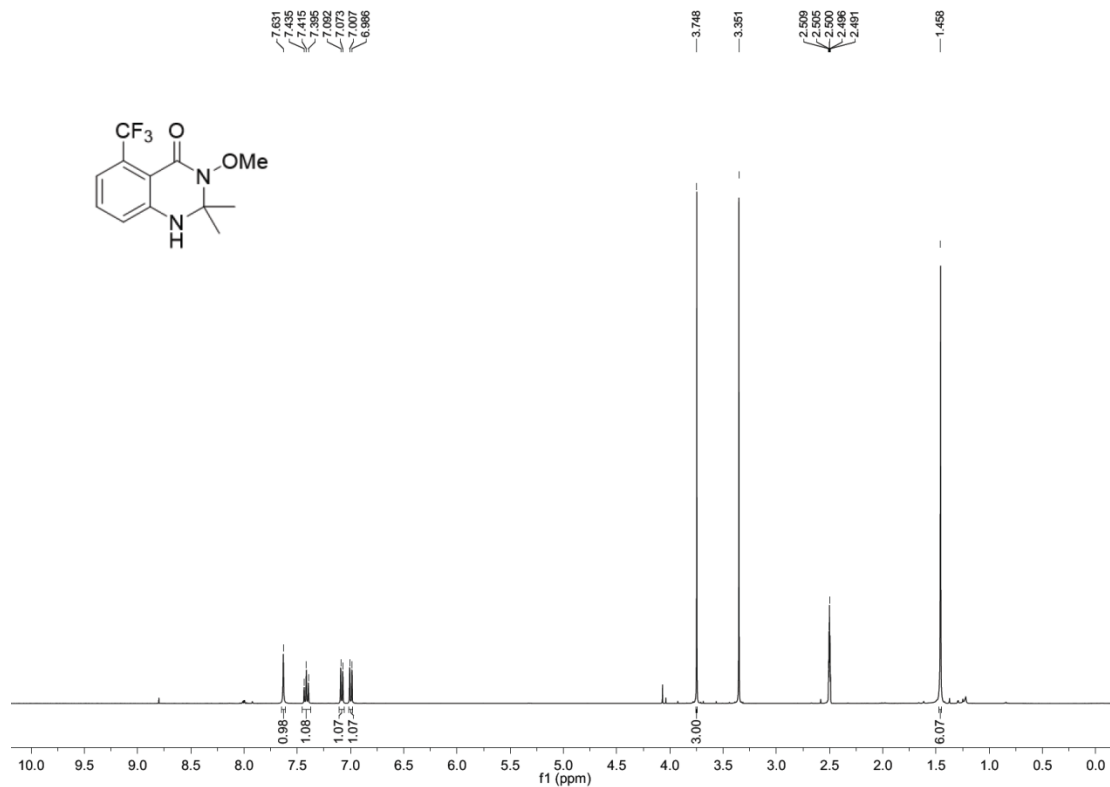

**3na**-<sup>13</sup>C NMR (100 MHz, DMSO-*d*<sub>6</sub>)

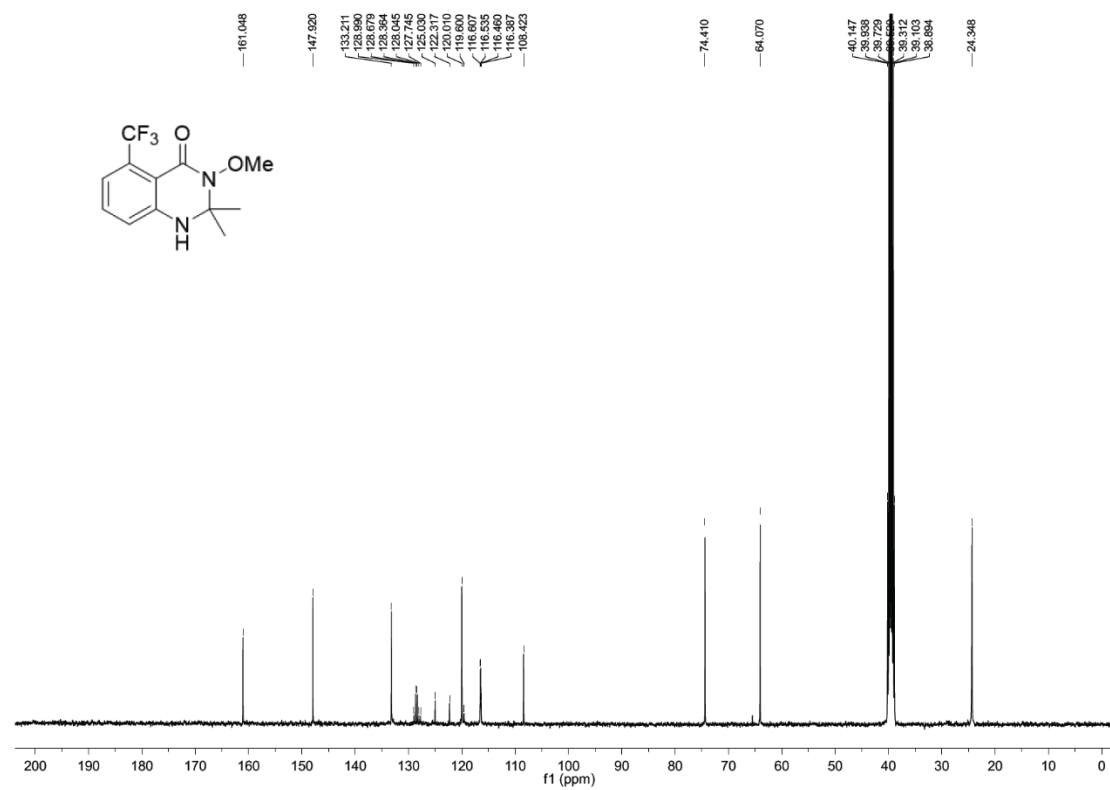

**3na**-<sup>19</sup>F NMR (376 MHz, DMSO-*d*<sub>6</sub>)

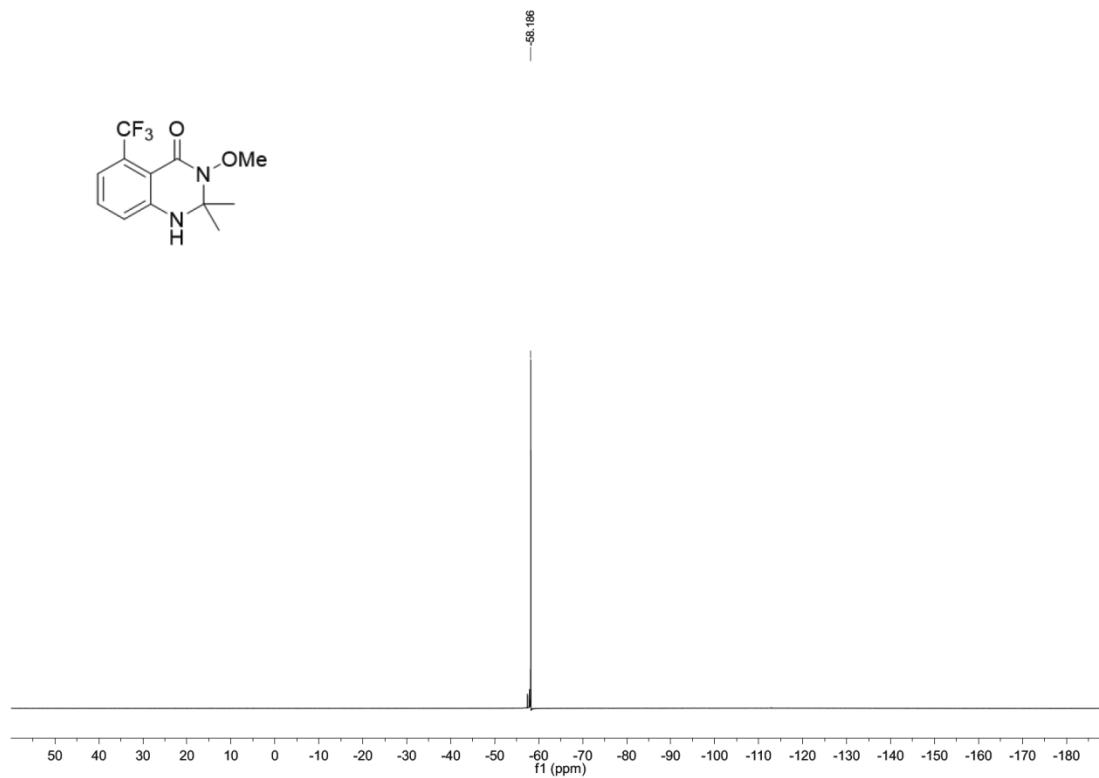

**30a**-<sup>1</sup>H NMR (400 MHz, DMSO-*d*<sub>6</sub>)

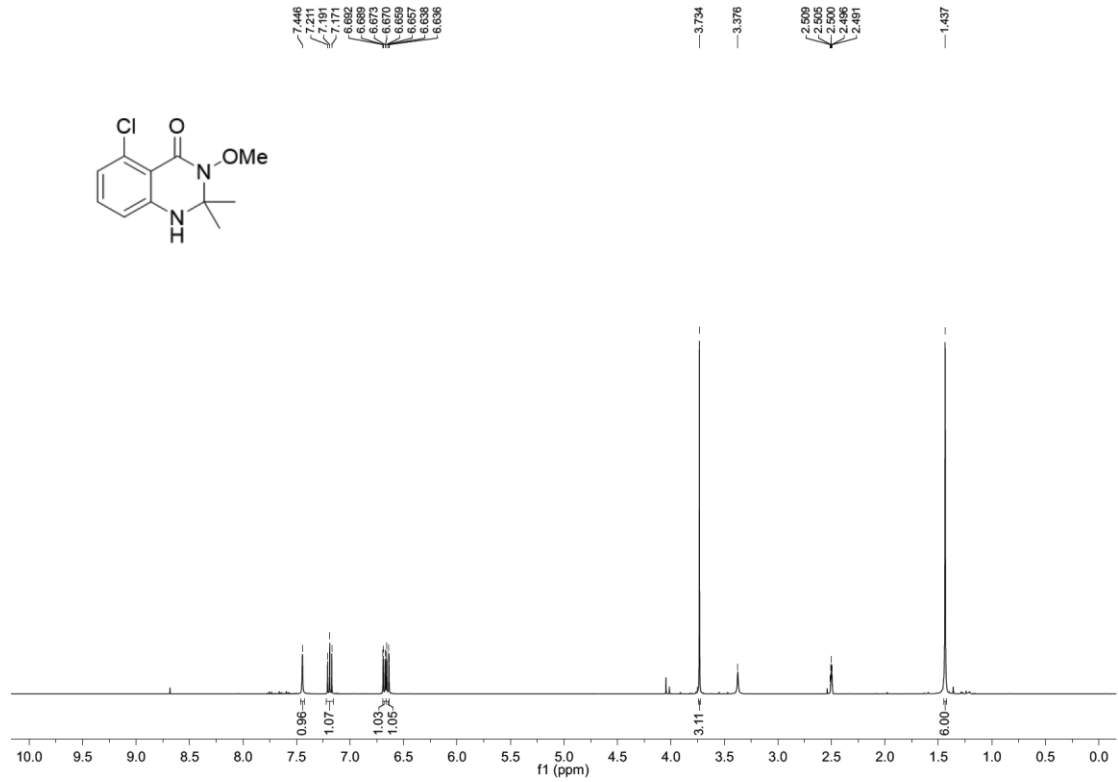

**30a**-<sup>13</sup>C NMR (100 MHz, DMSO-*d*<sub>6</sub>)

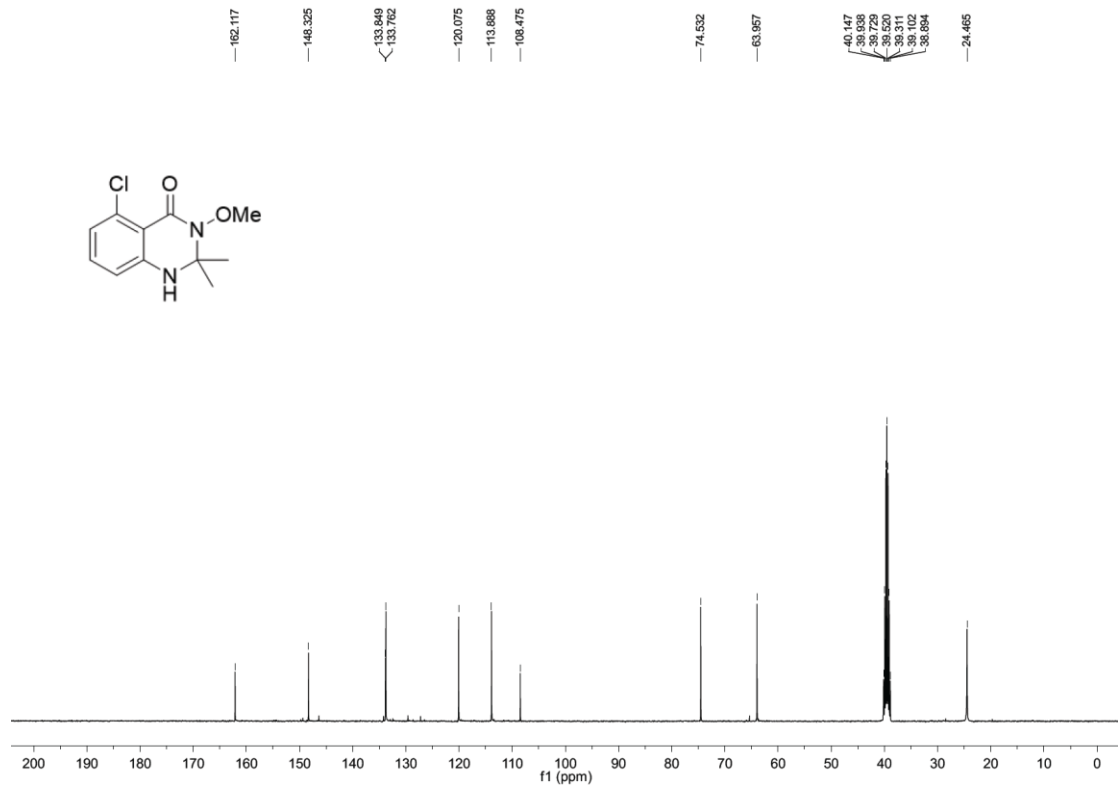



**3pa**-<sup>1</sup>H NMR (400 MHz, DMSO-*d*<sub>6</sub>)

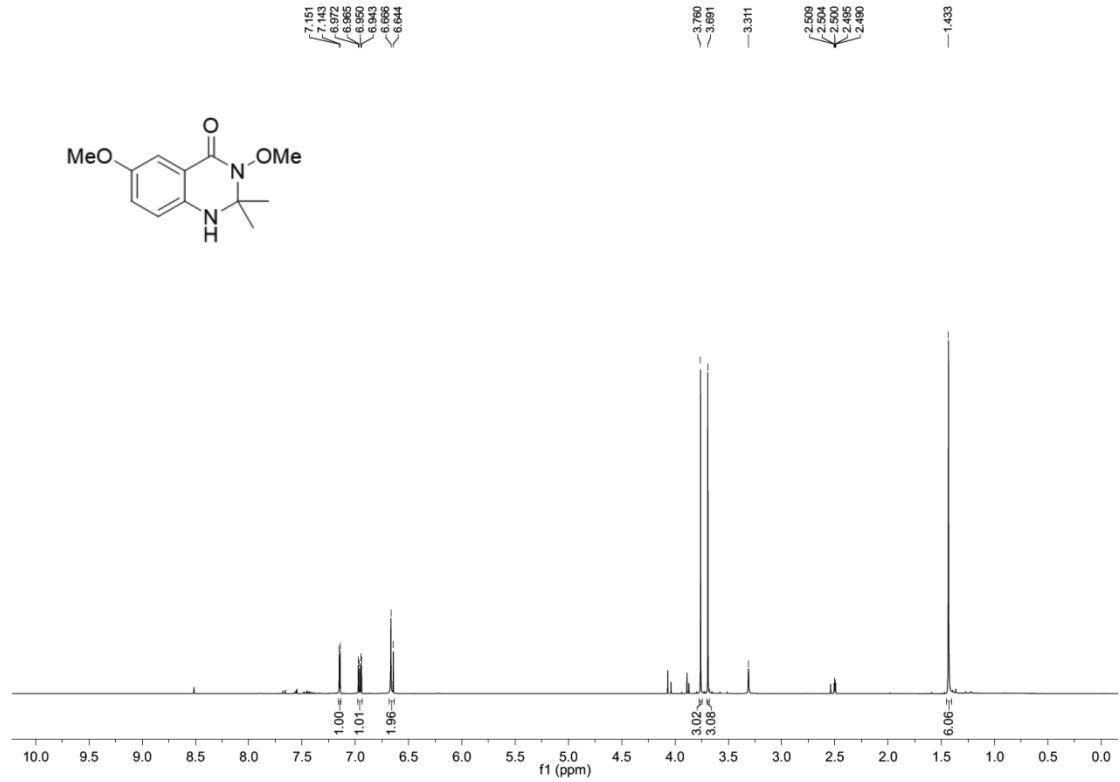

**3pa**-<sup>13</sup>C NMR (100 MHz, DMSO-*d*<sub>6</sub>)

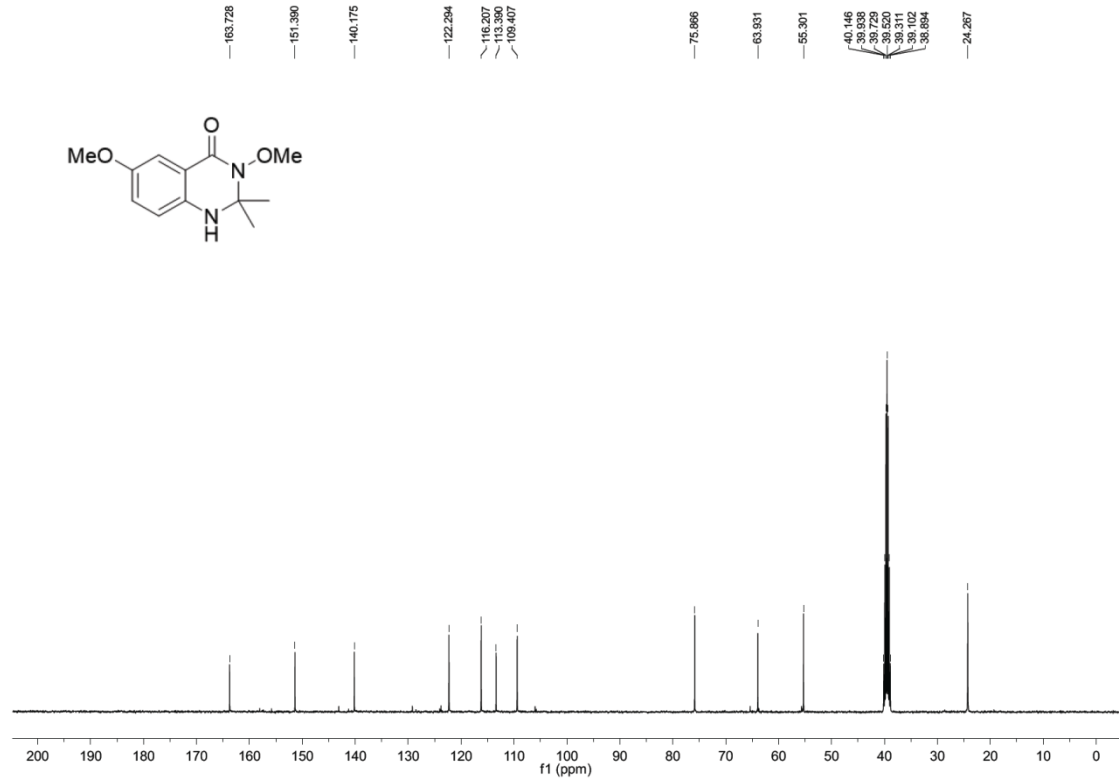

**3pa'** -  $^1\text{H}$  NMR (400 MHz,  $\text{DMSO-}d_6$ )

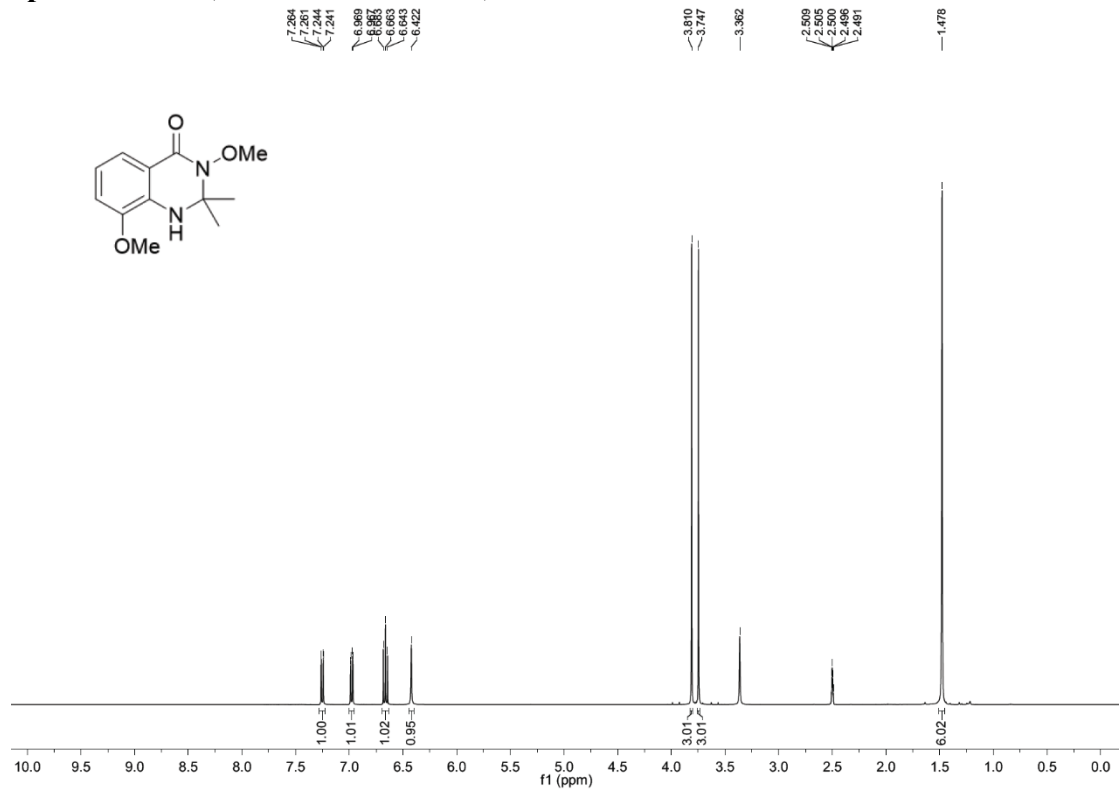

**3pa'** -  $^{13}\text{C}$  NMR (100 MHz,  $\text{DMSO-}d_6$ )

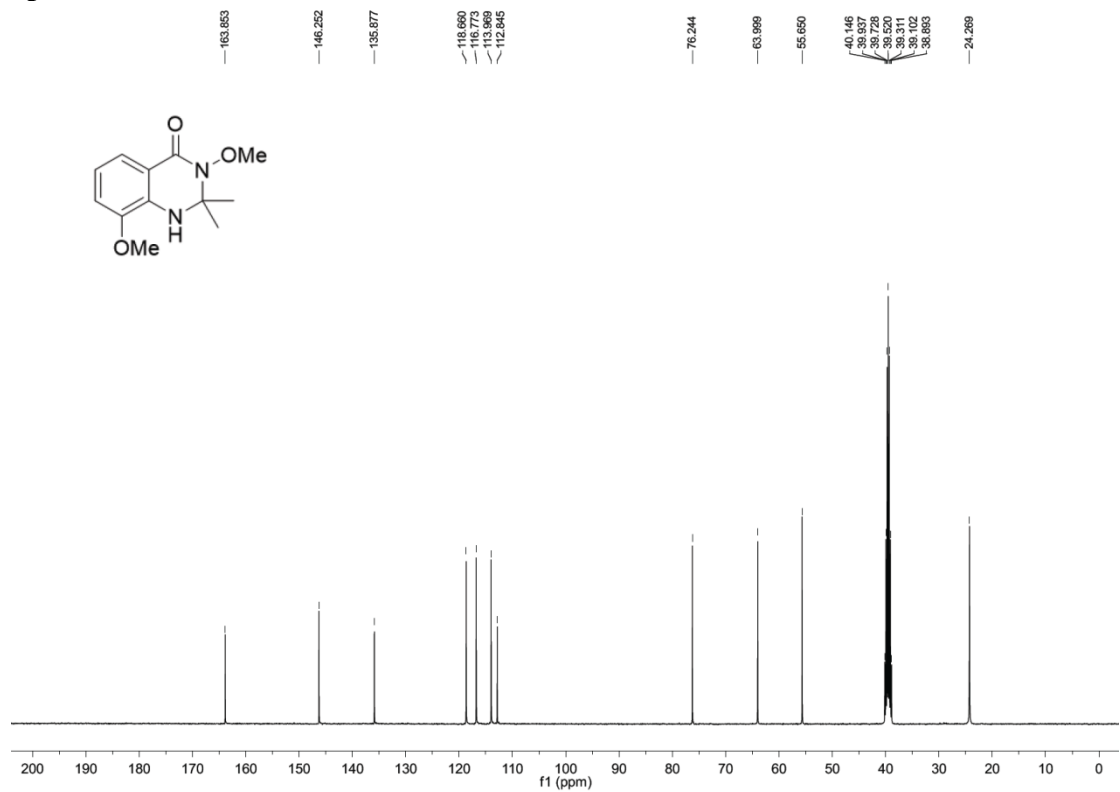

**3qa-<sup>1</sup>H NMR (400 MHz, DMSO-*d*<sub>6</sub>)**

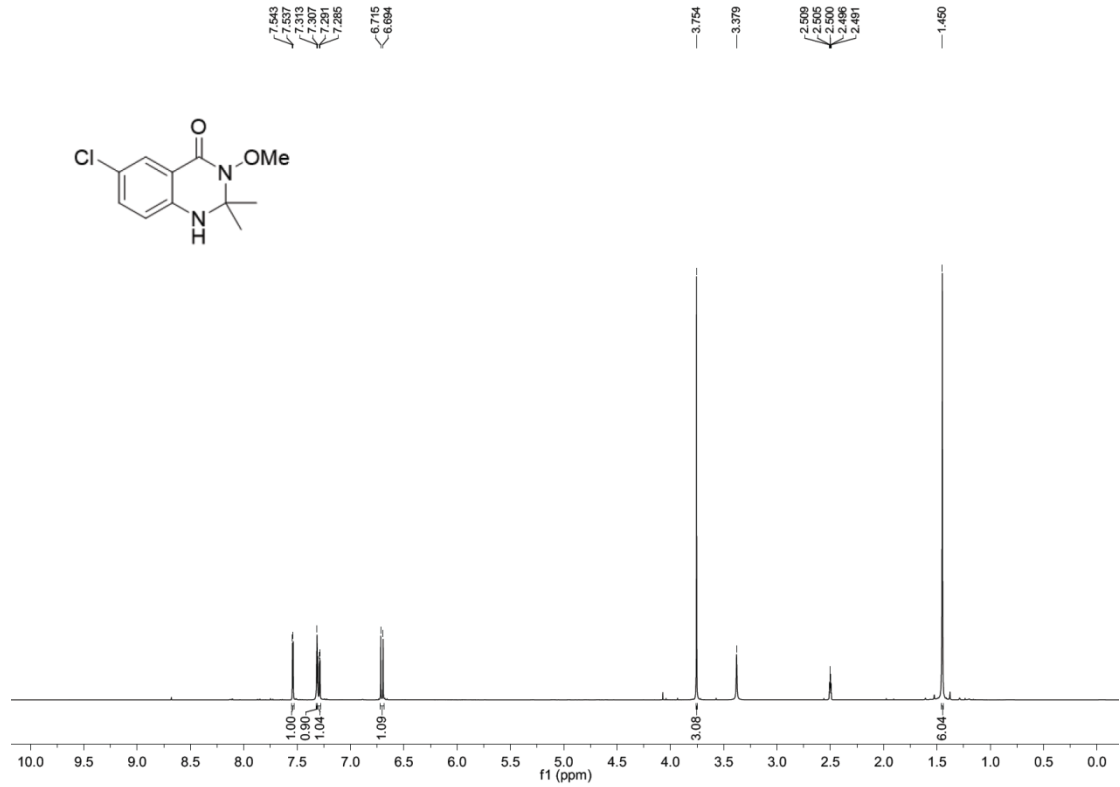

**3qa-<sup>13</sup>C NMR (100 MHz, DMSO-*d*<sub>6</sub>)**

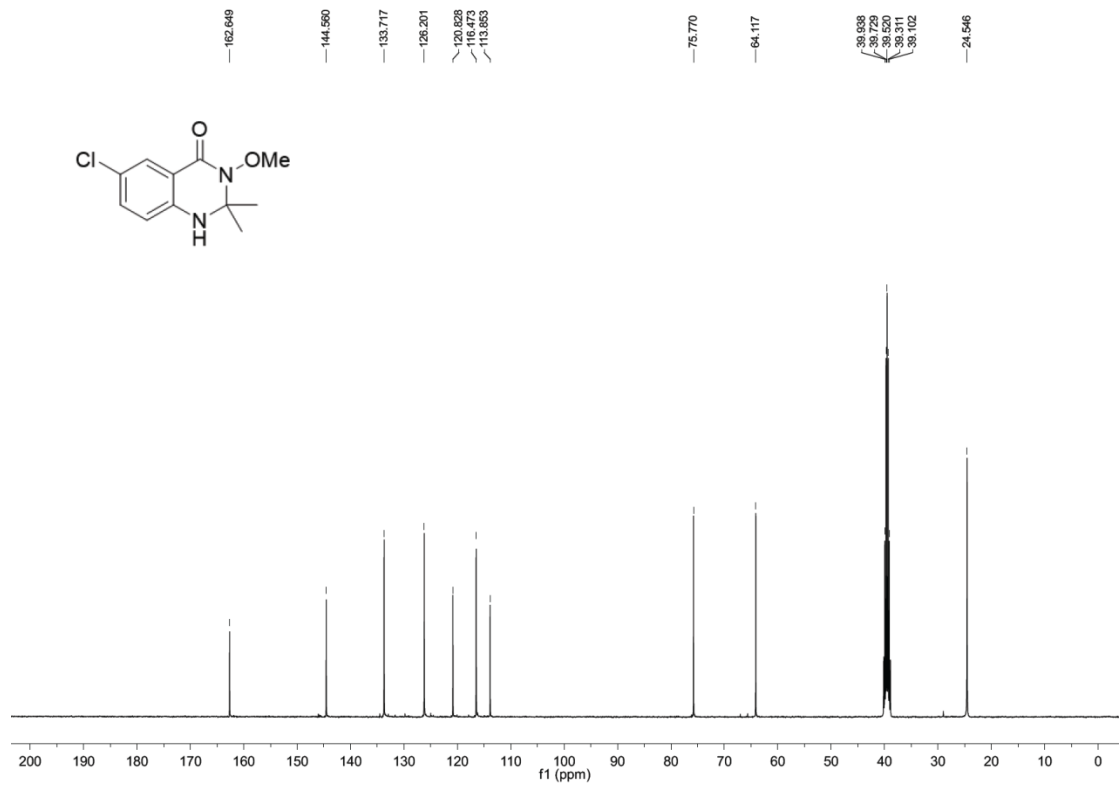

**3ra-<sup>1</sup>H NMR (400 MHz, CD<sub>3</sub>OD)**

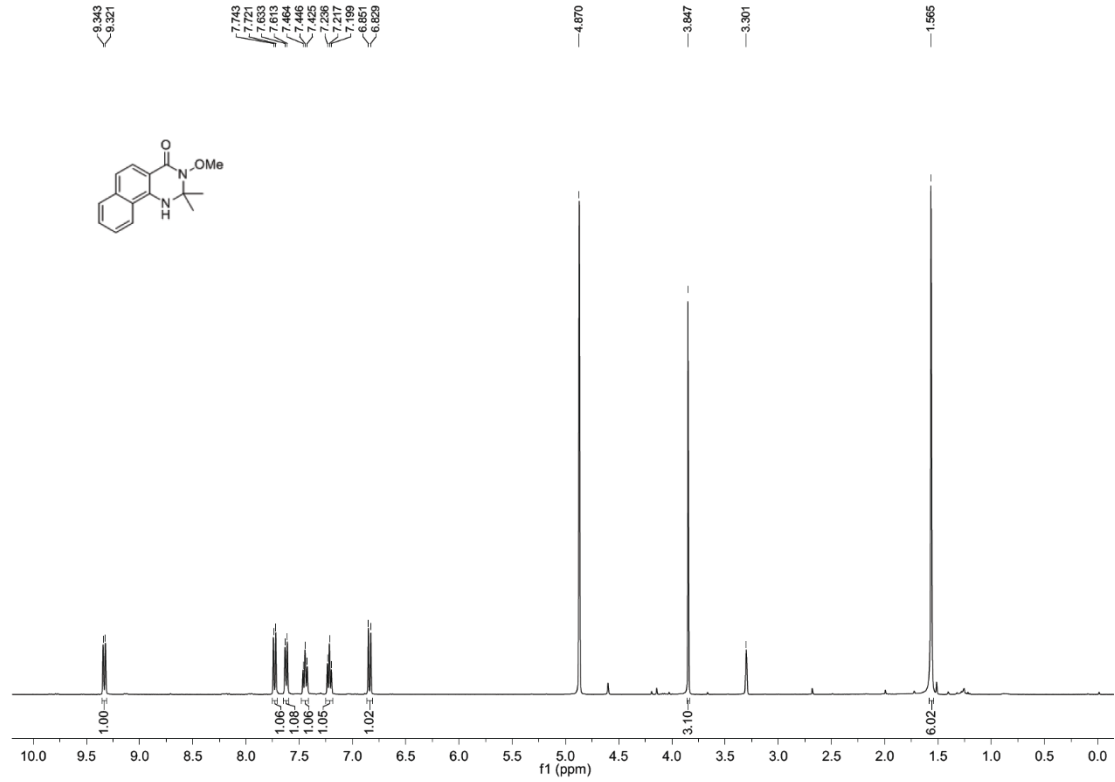

**3ra-<sup>13</sup>C NMR (100 MHz, CD<sub>3</sub>OD)**

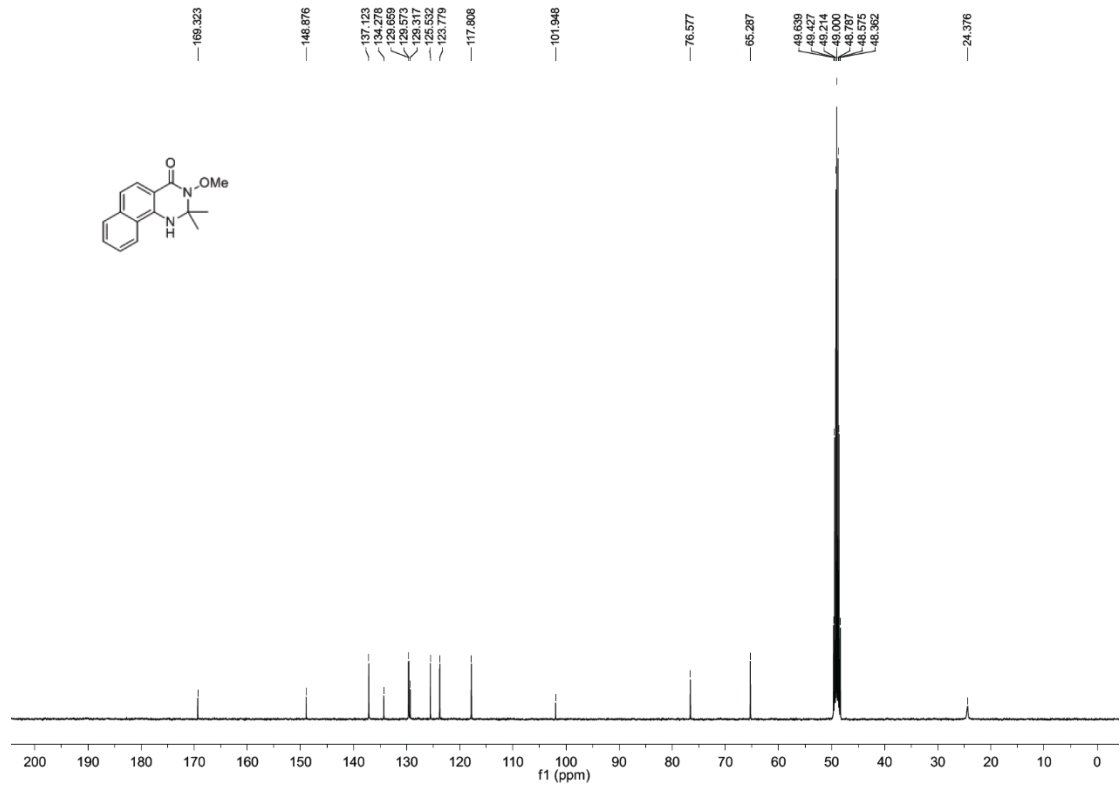

**3sa**-<sup>1</sup>H NMR (400 MHz, DMSO-*d*<sub>6</sub>)

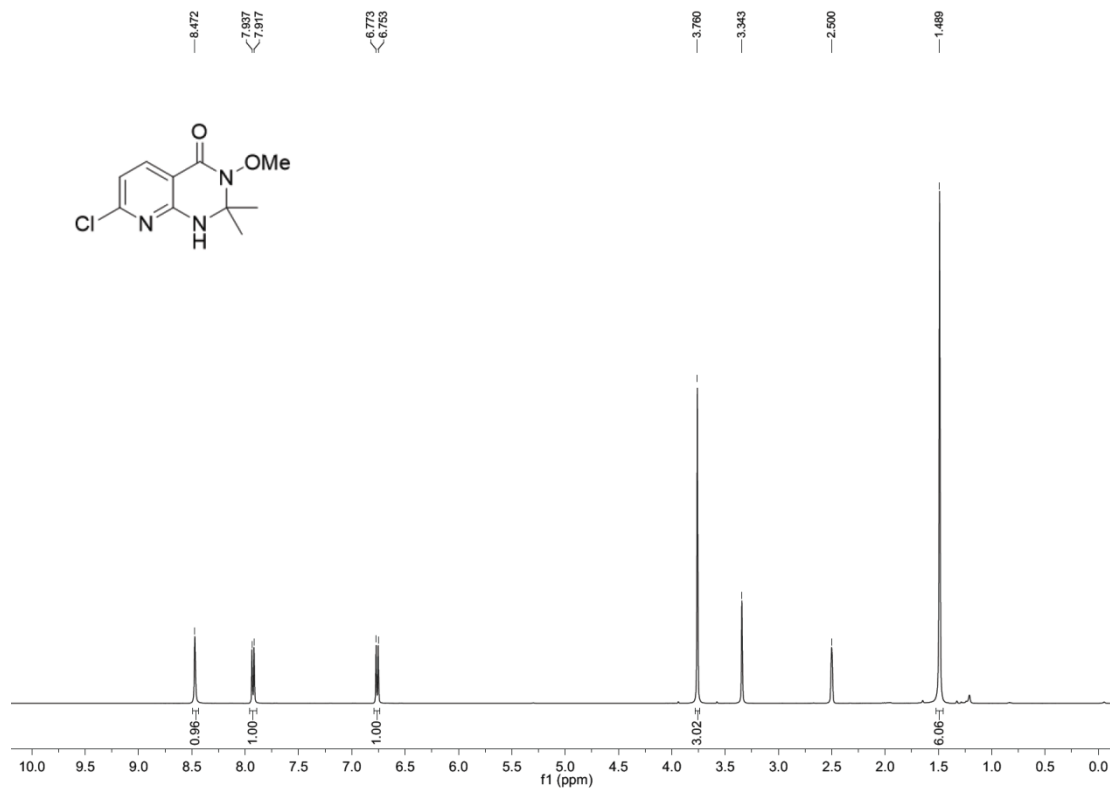

**3sa**-<sup>13</sup>C NMR (100 MHz, DMSO-*d*<sub>6</sub>)

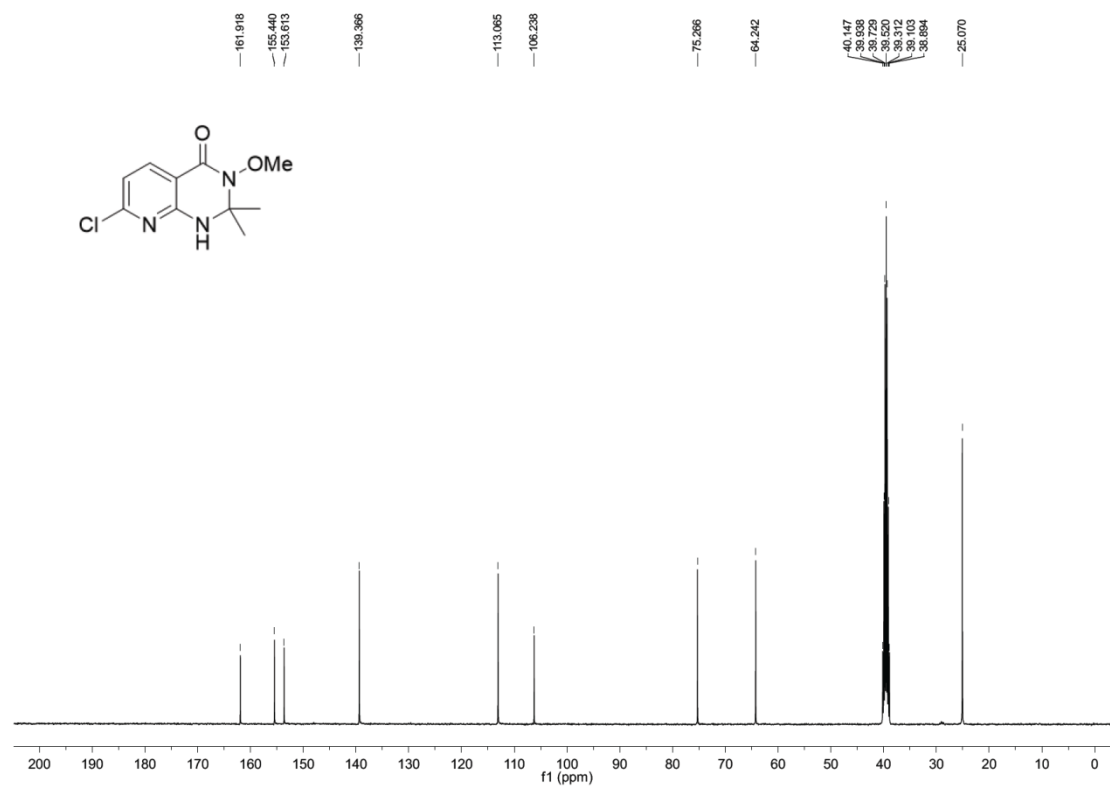

**3ta**-<sup>1</sup>H NMR (400 MHz, DMSO-*d*<sub>6</sub>)

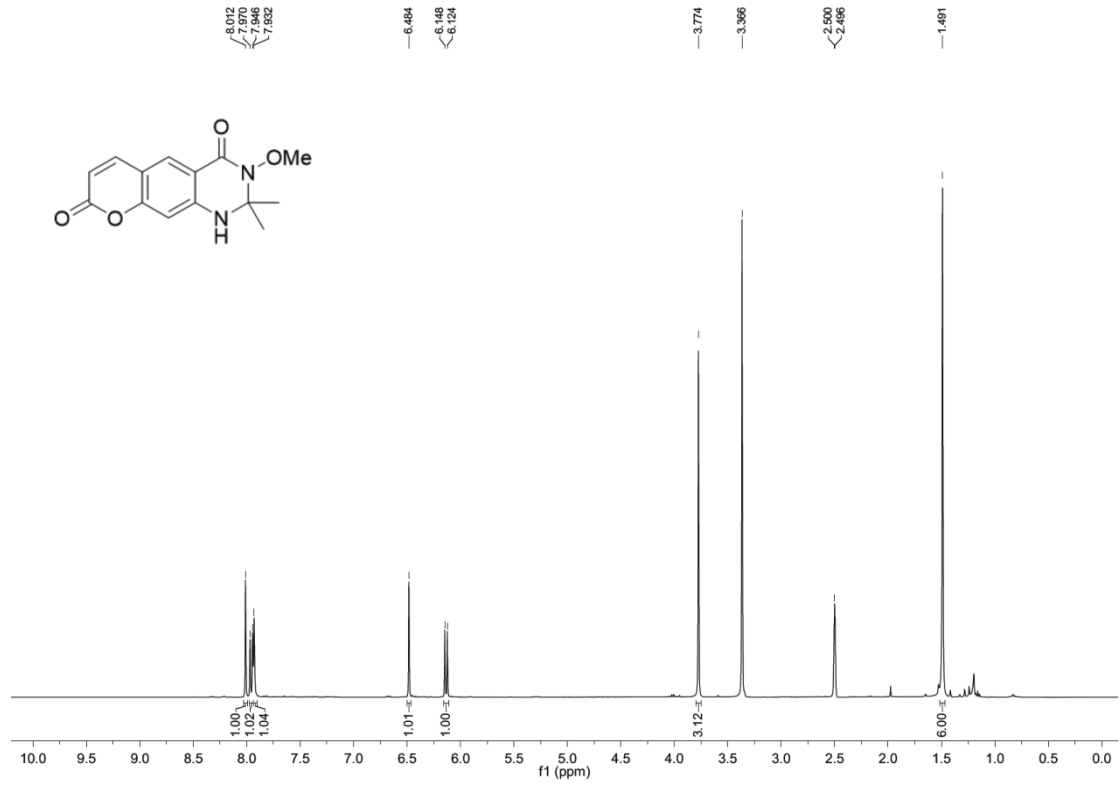

**3ta**-<sup>13</sup>C NMR (100 MHz, DMSO-*d*<sub>6</sub>)

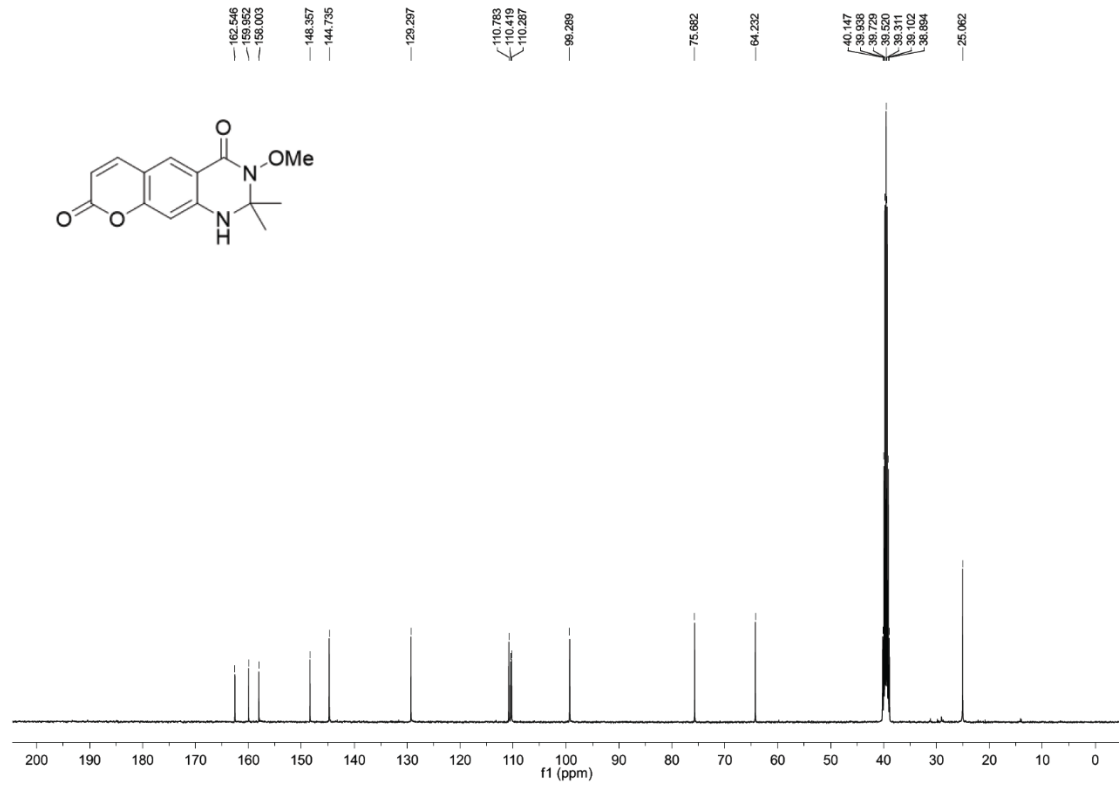

**3ua**-<sup>1</sup>H NMR (400 MHz, DMSO-*d*<sub>6</sub>)

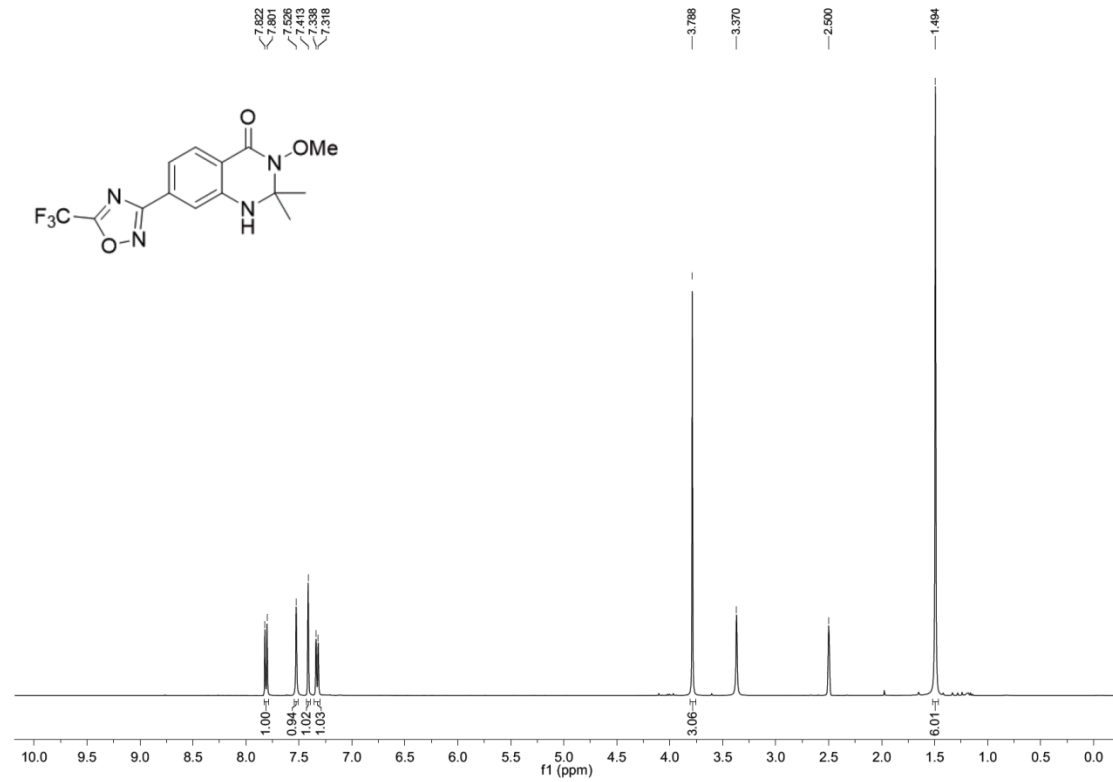

**3ua**-<sup>13</sup>C NMR (100 MHz, DMSO-*d*<sub>6</sub>)

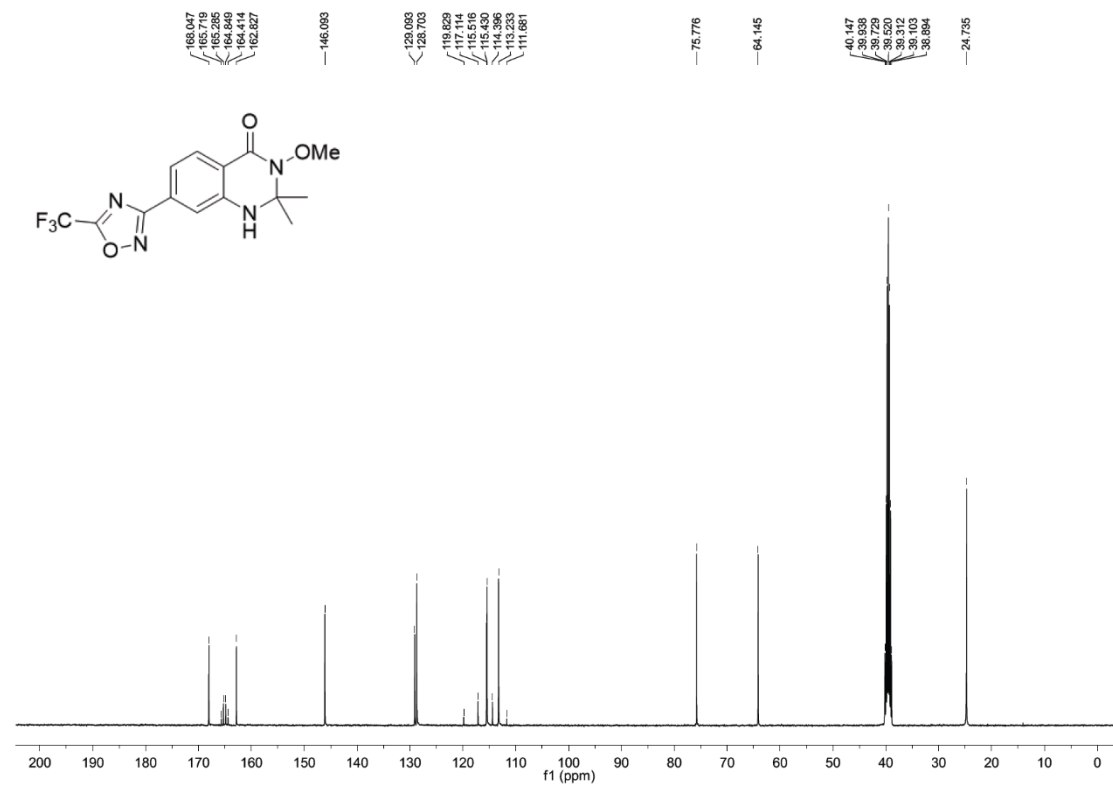

**3ua**-<sup>19</sup>F NMR (376 MHz, DMSO-*d*<sub>6</sub>)

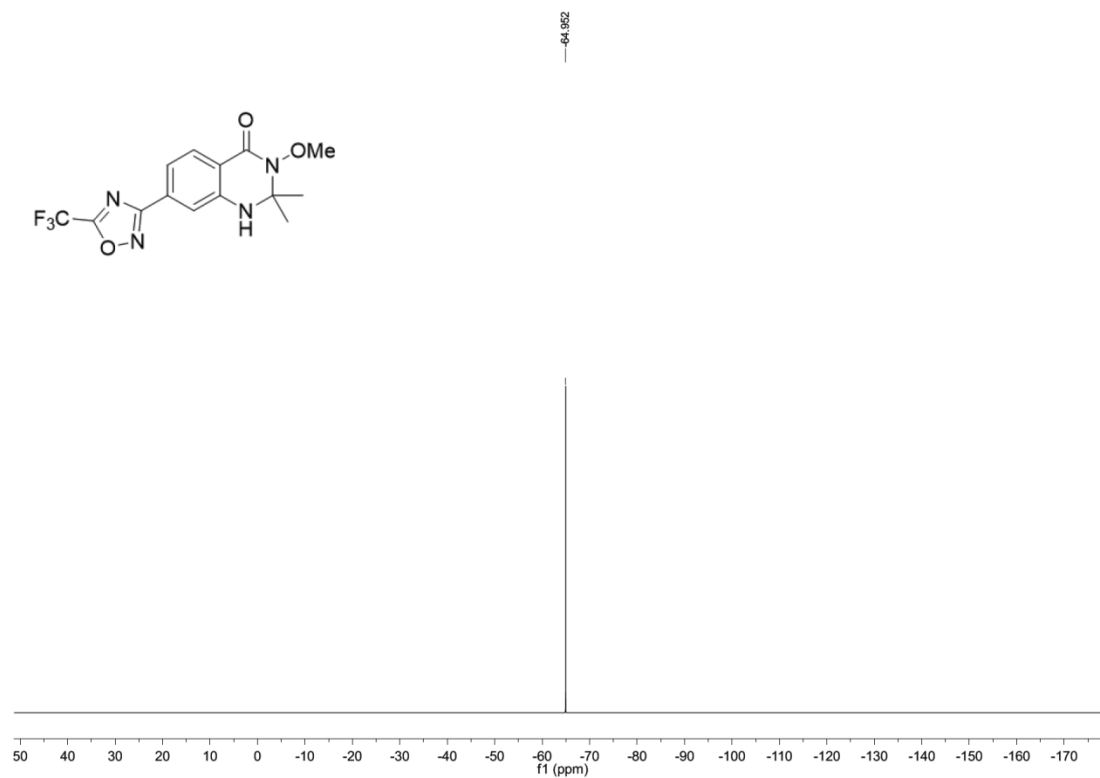



**3va-<sup>1</sup>H NMR (400 MHz, DMSO-*d*<sub>6</sub>)**

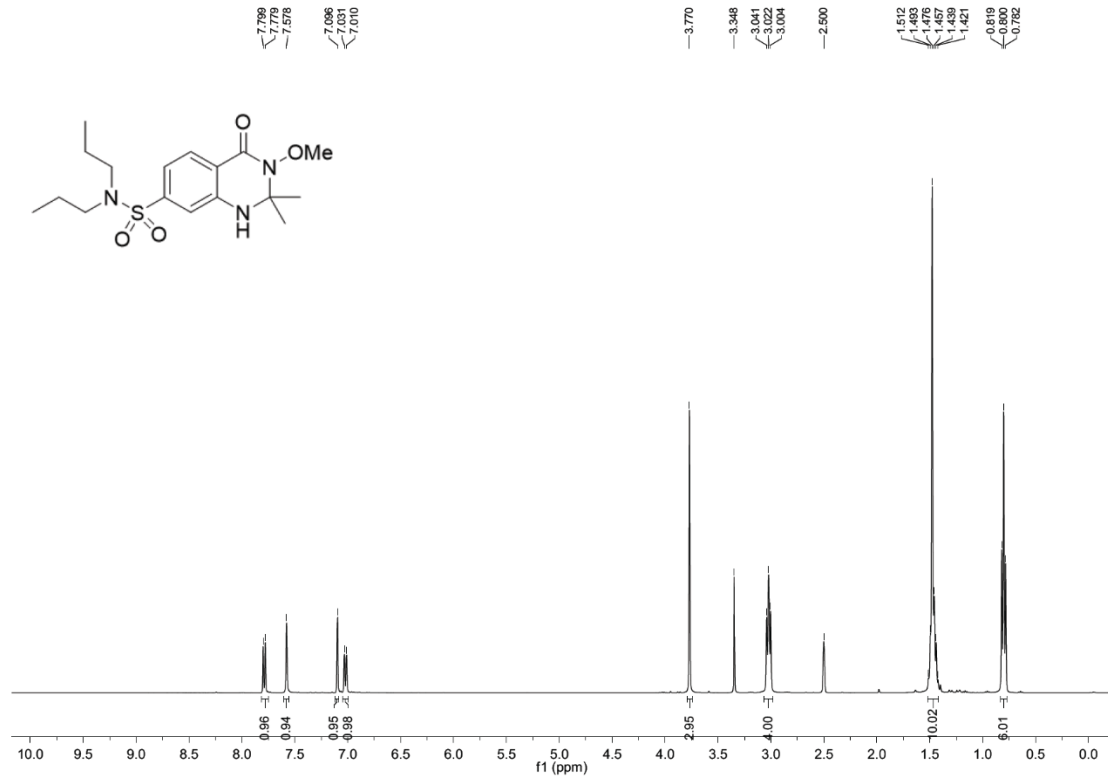

**3va-<sup>13</sup>C NMR (100 MHz, DMSO-*d*<sub>6</sub>)**

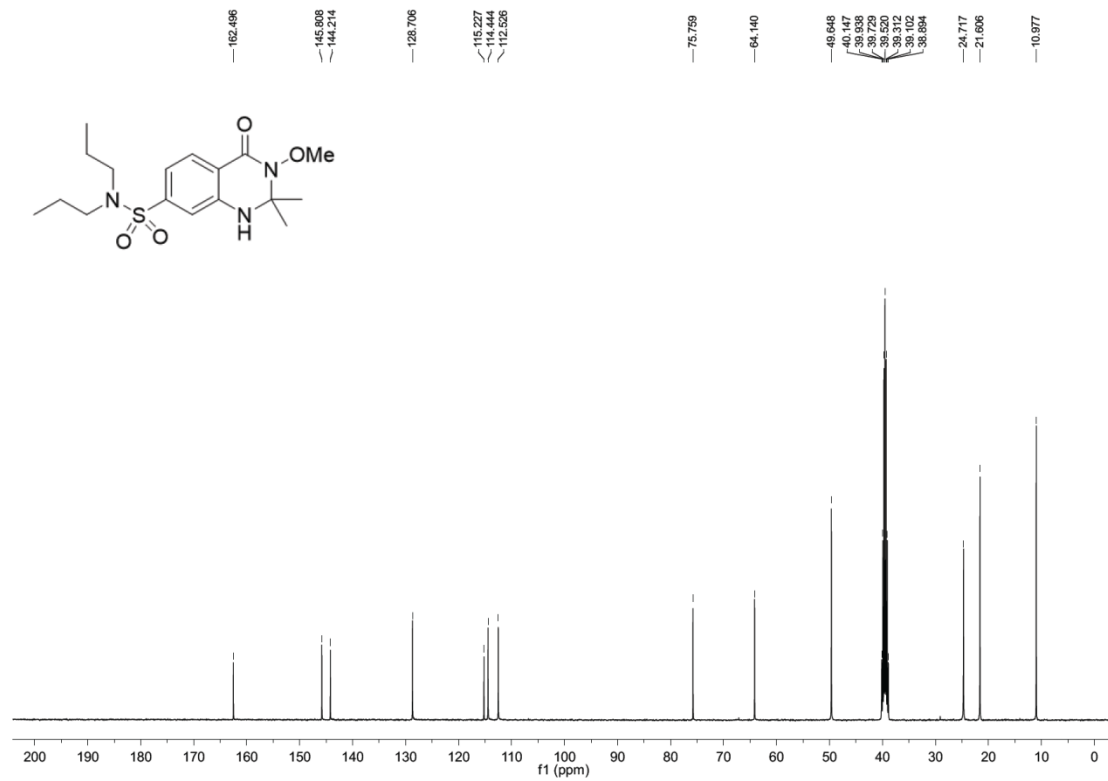

**3wa**-<sup>1</sup>H NMR (400 MHz, DMSO-*d*<sub>6</sub>)

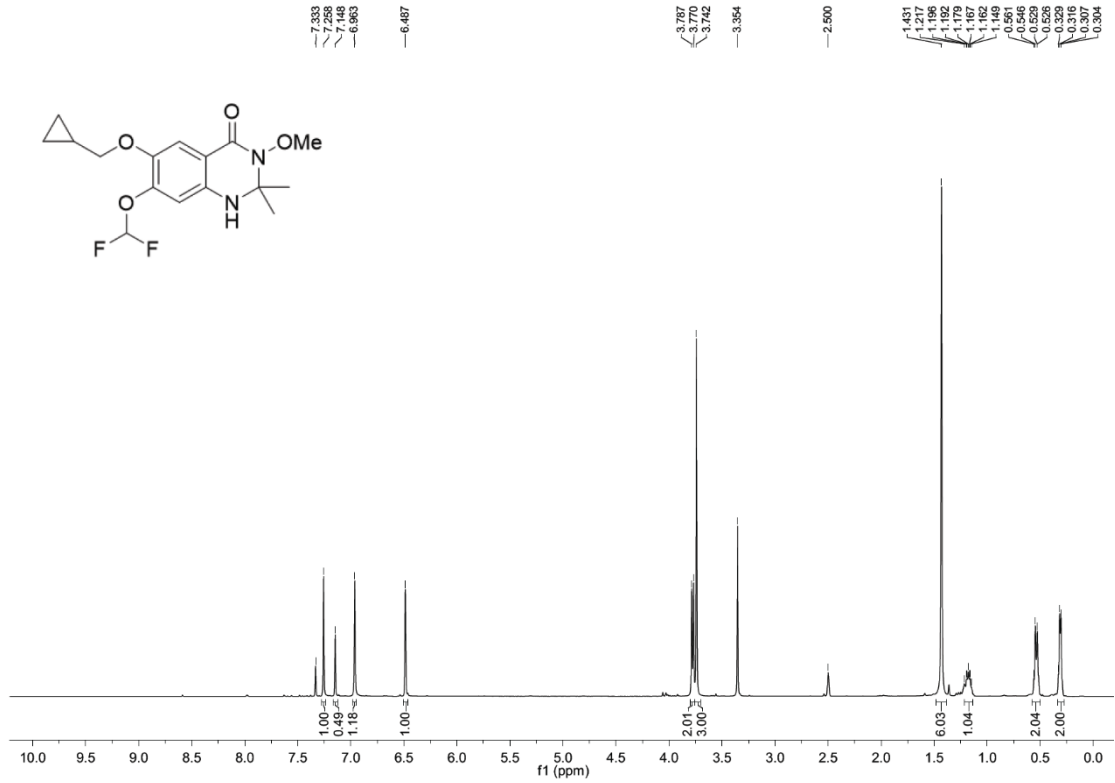

**3wa**-<sup>13</sup>C NMR (100 MHz, DMSO-*d*<sub>6</sub>)

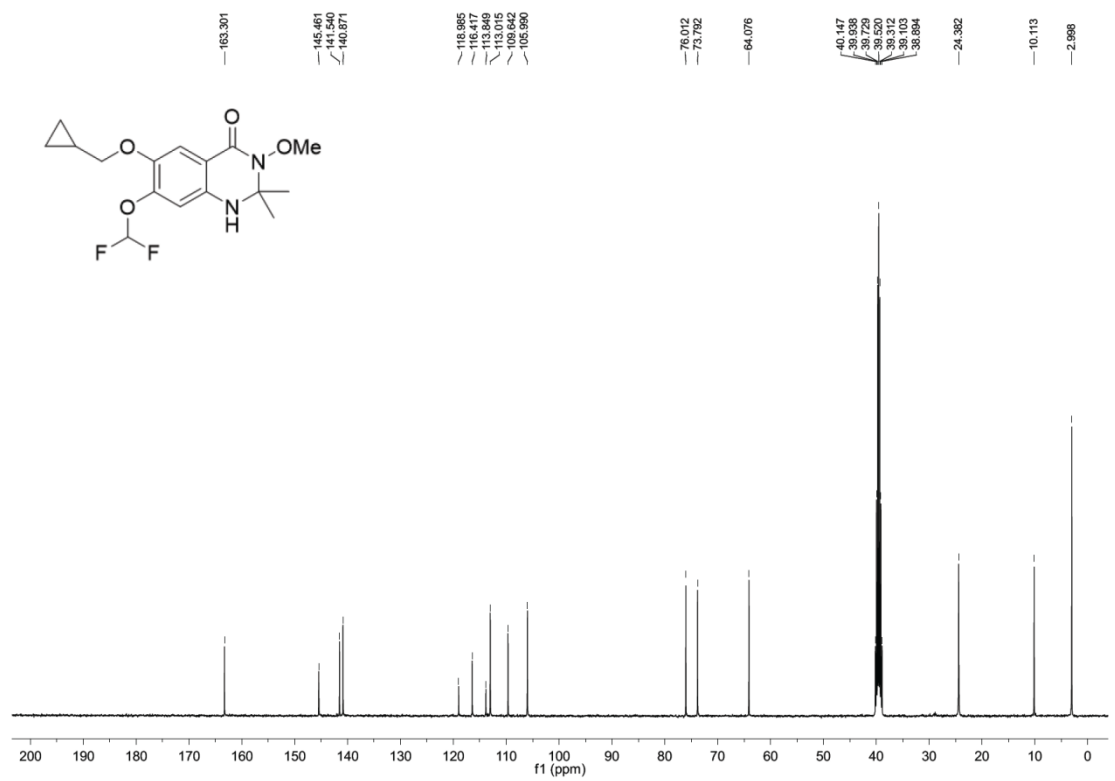

**3wa**-<sup>19</sup>F NMR (376 MHz, DMSO-*d*<sub>6</sub>)

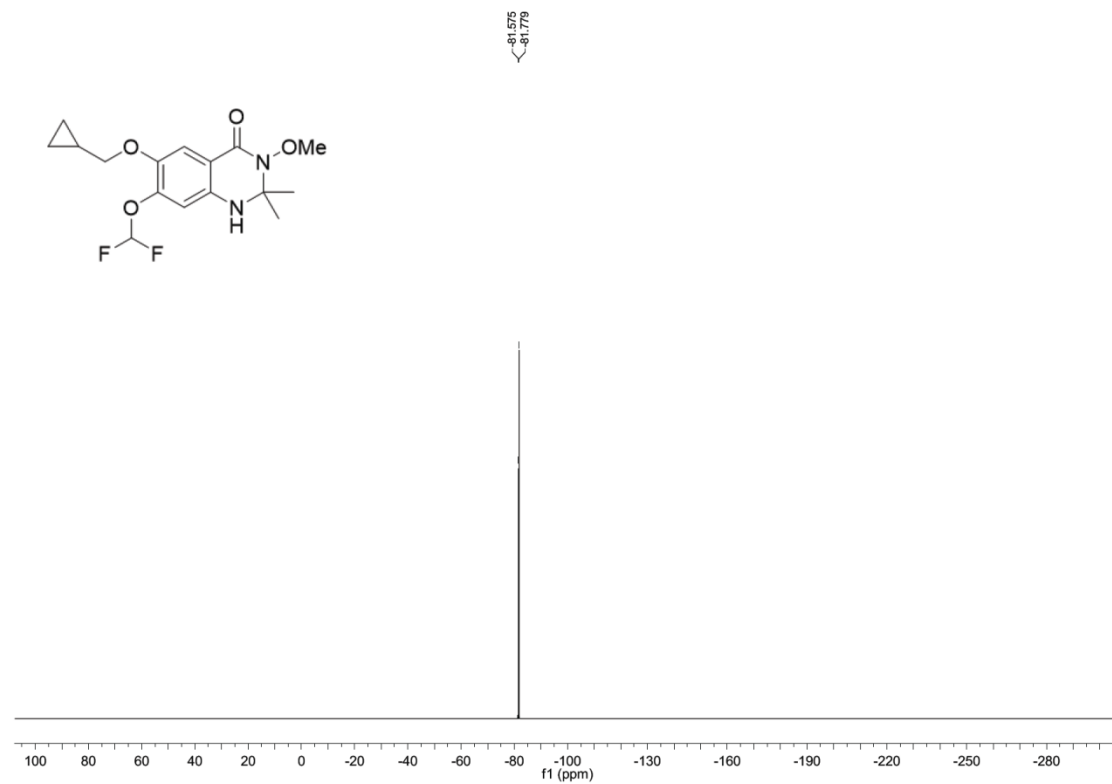

**3xa**-<sup>1</sup>H NMR (400 MHz, DMSO-*d*<sub>6</sub>)

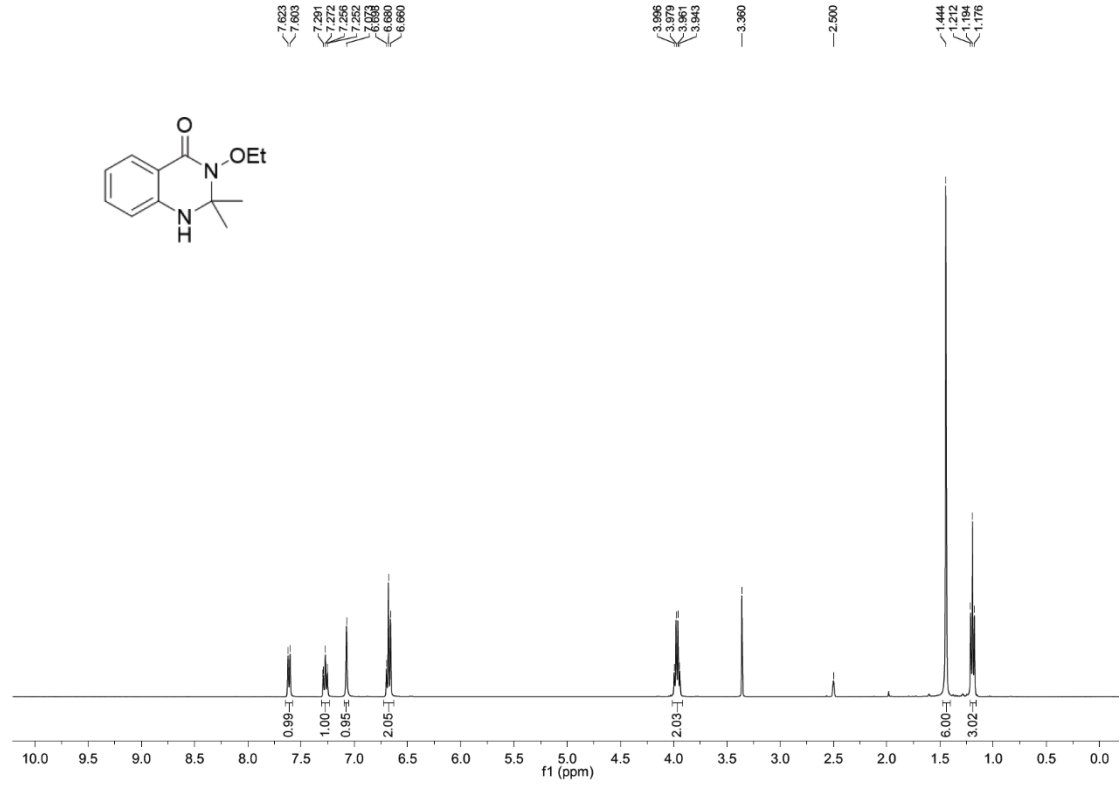

**3xa**-<sup>13</sup>C NMR (100 MHz, DMSO-*d*<sub>6</sub>)

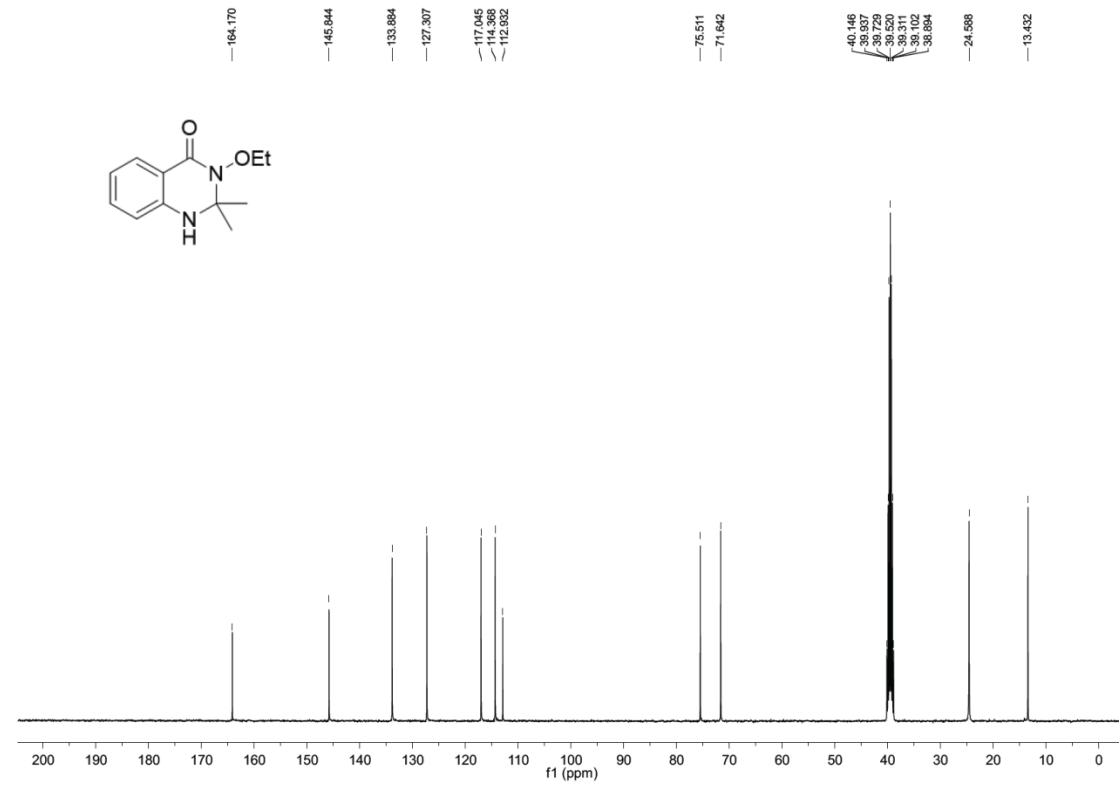

**3ya**-<sup>1</sup>H NMR (400 MHz, CD<sub>3</sub>OD)

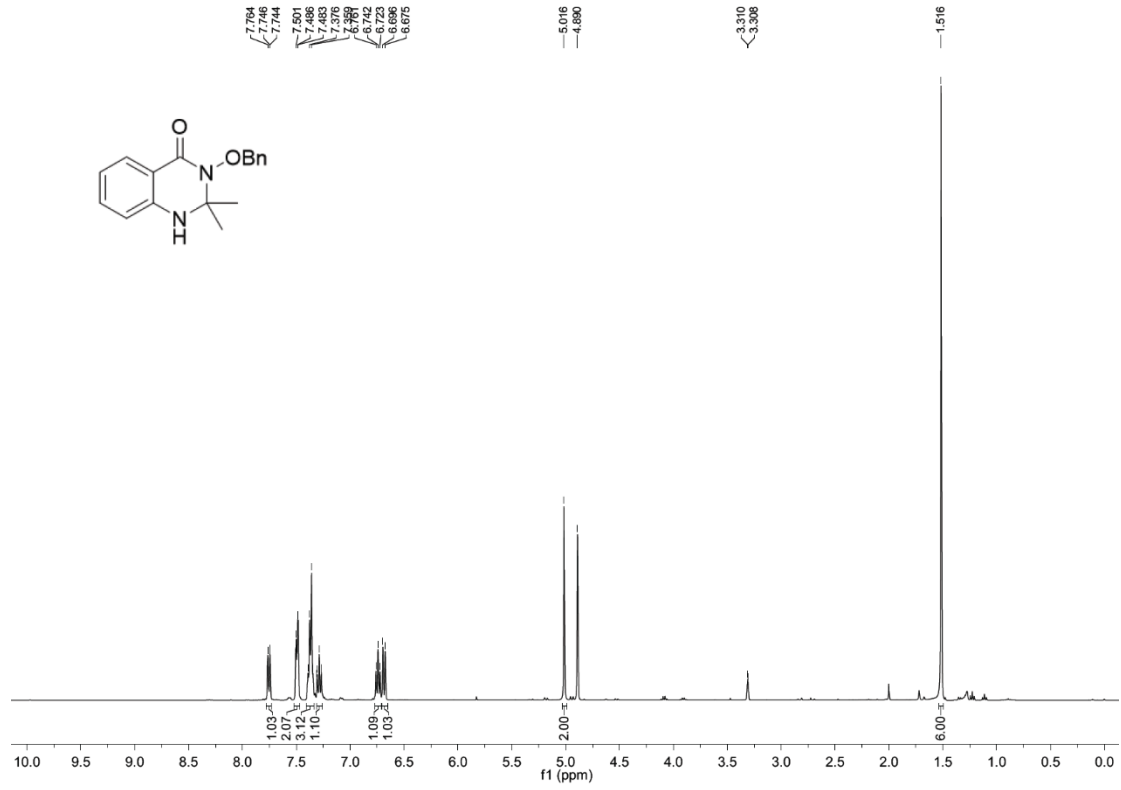

**3ya**-<sup>13</sup>C NMR (100 MHz, CD<sub>3</sub>OD)

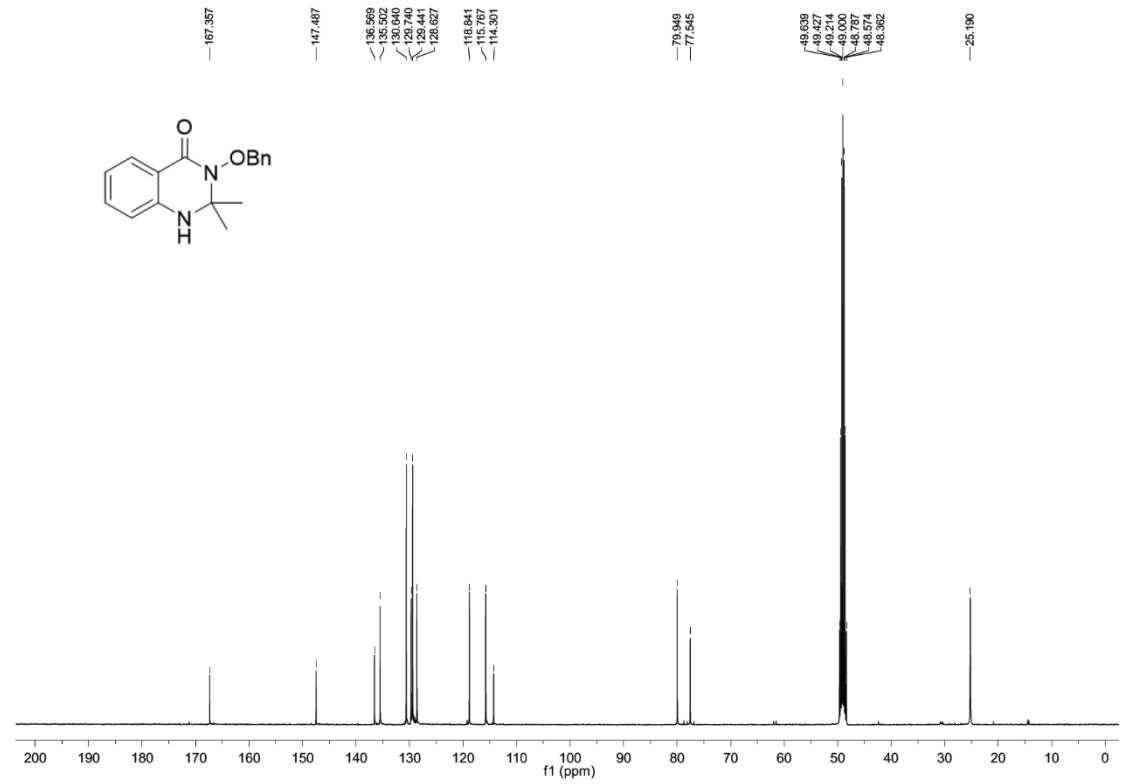

**3ab**-<sup>1</sup>H NMR (400 MHz, DMSO-*d*<sub>6</sub>)

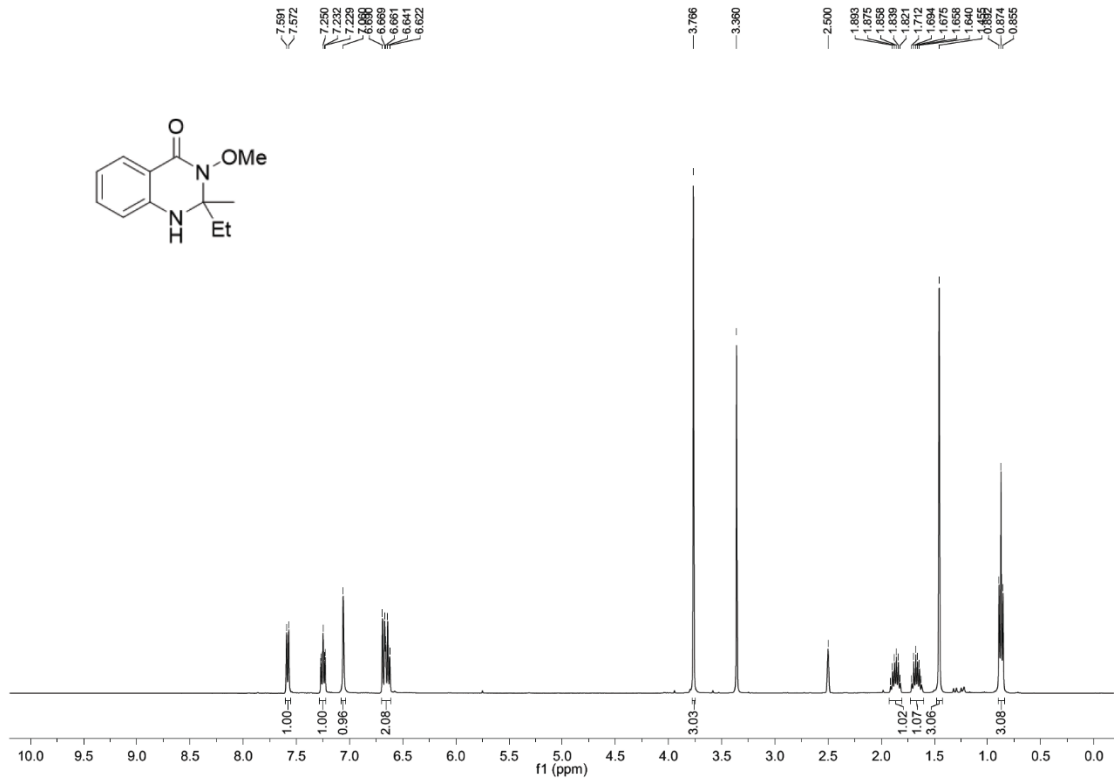

**3ab**-<sup>13</sup>C NMR (100 MHz, DMSO-*d*<sub>6</sub>)

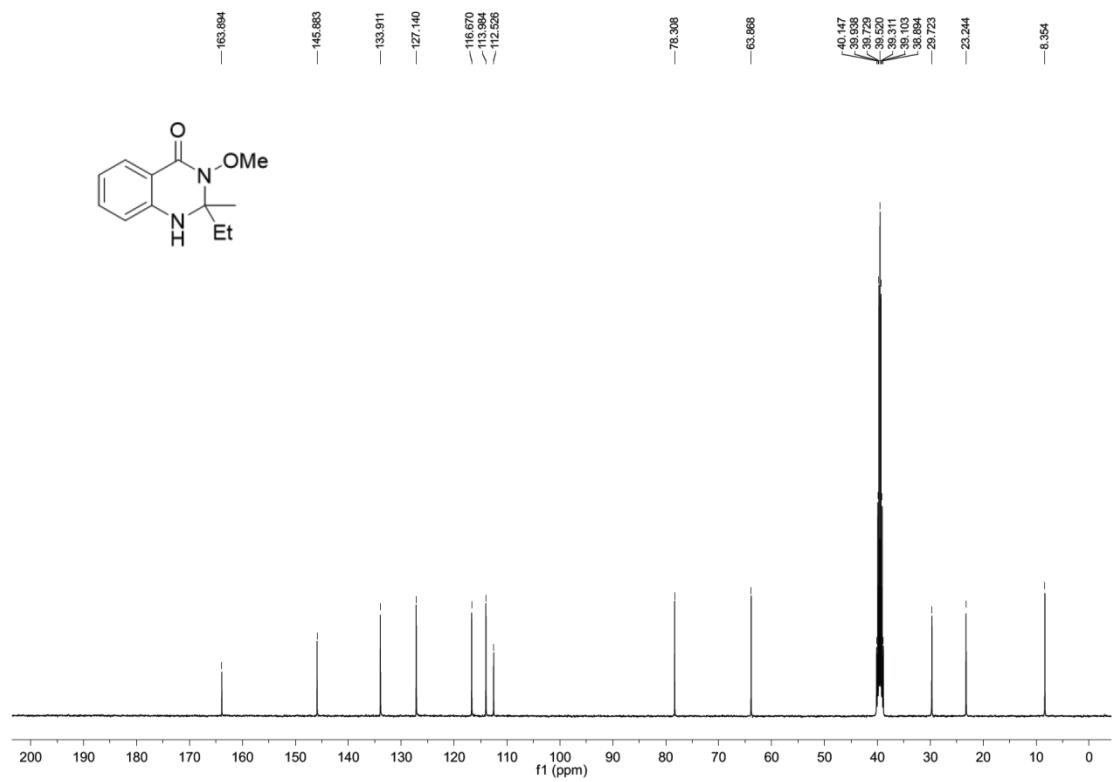

**3ac**-<sup>1</sup>H NMR (400 MHz, DMSO-*d*<sub>6</sub>)

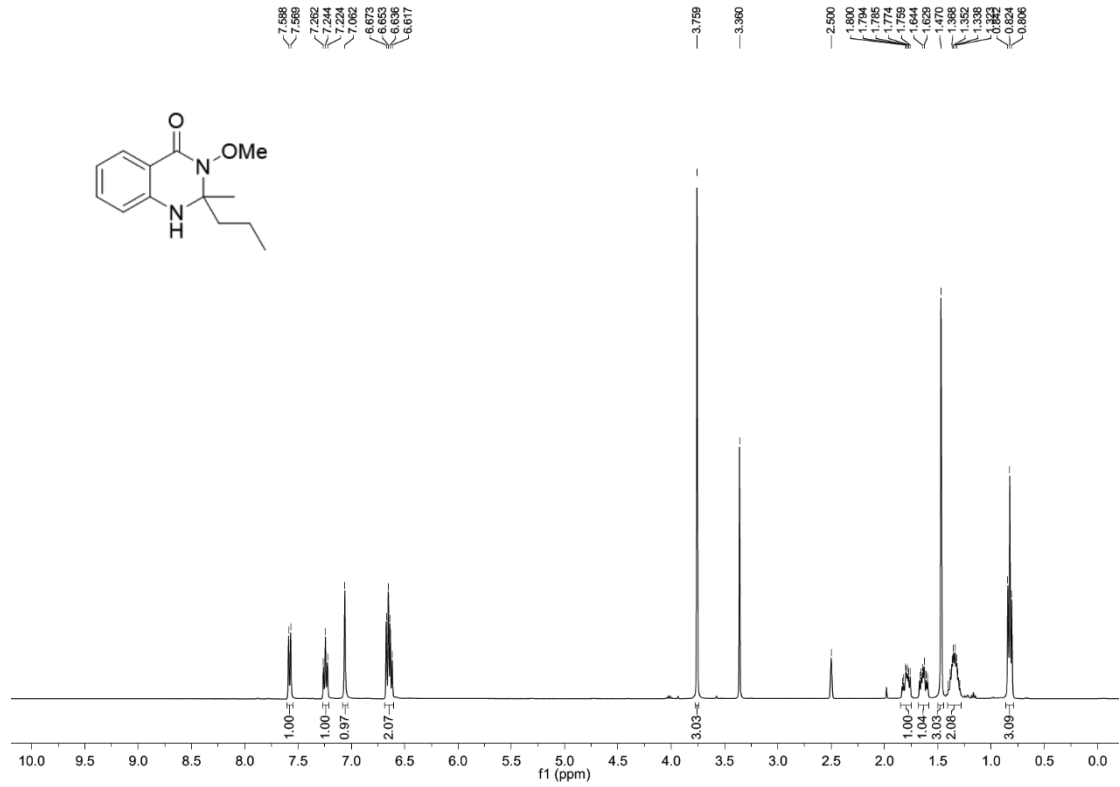

**3ac**-<sup>13</sup>C NMR (100 MHz, DMSO-*d*<sub>6</sub>)

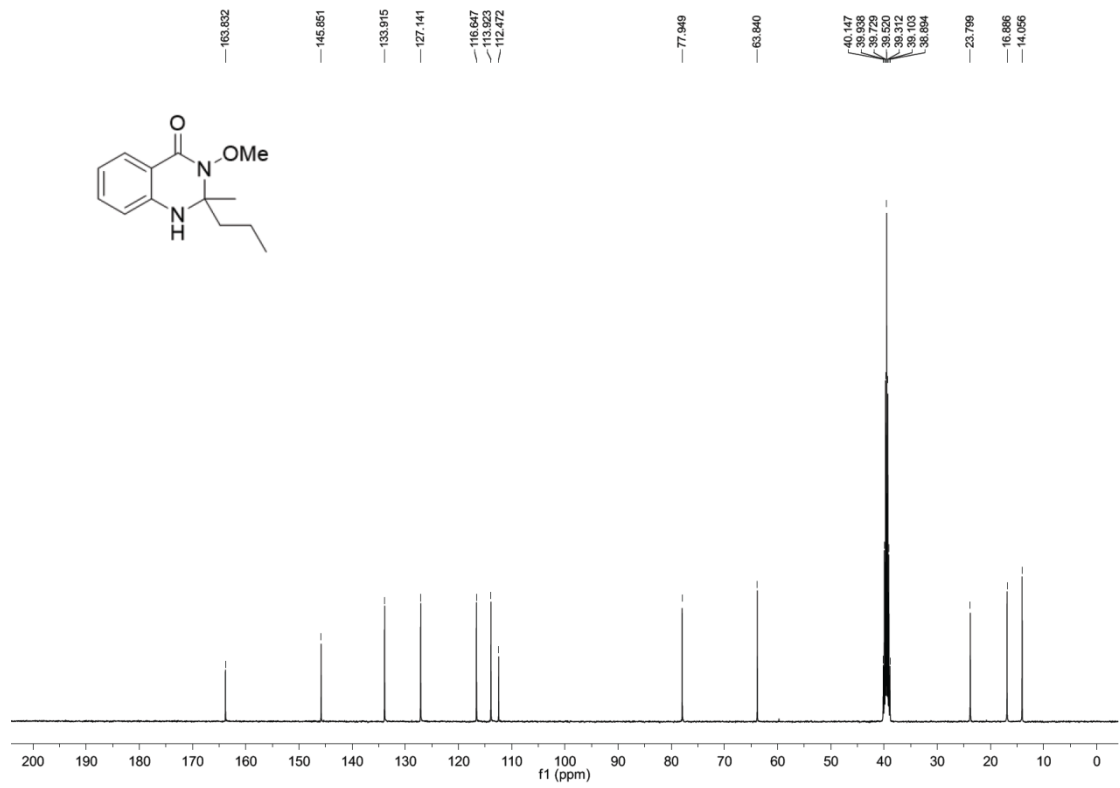

**3ad**-<sup>1</sup>H NMR (400 MHz, DMSO-*d*<sub>6</sub>)

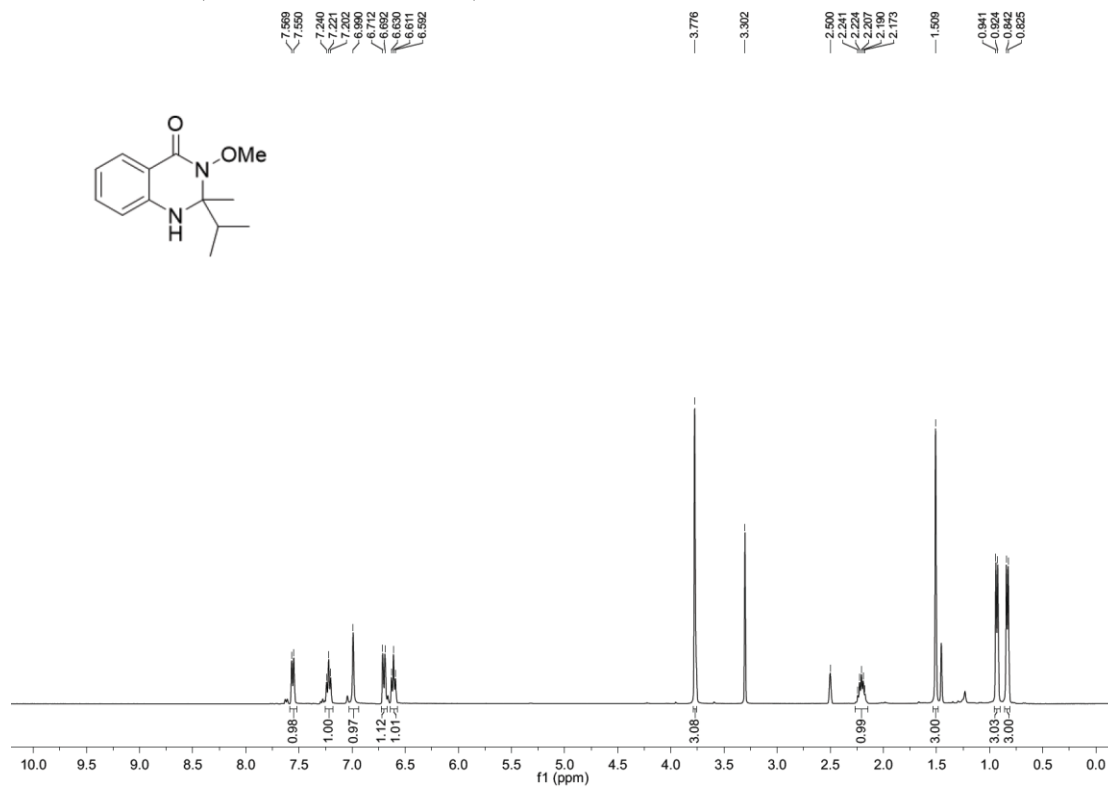

**3ad**-<sup>13</sup>C NMR (100 MHz, DMSO-*d*<sub>6</sub>)

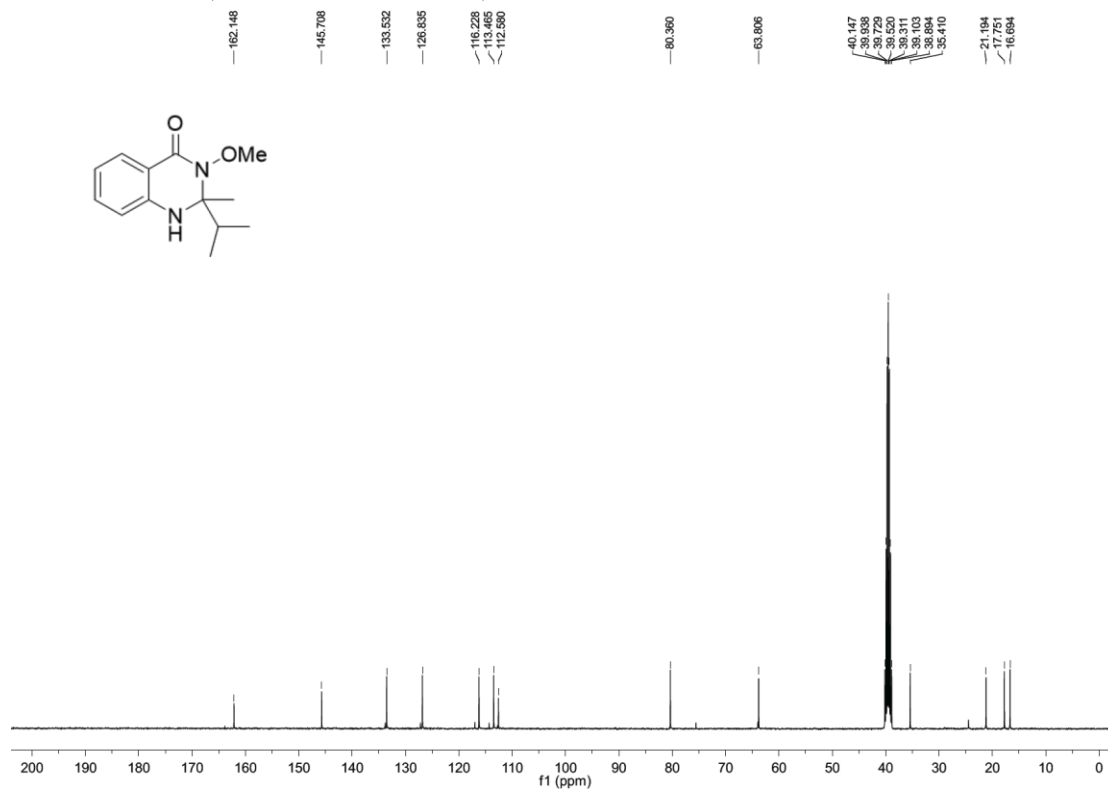



**3ae**-<sup>1</sup>H NMR (400 MHz, DMSO-*d*<sub>6</sub>)

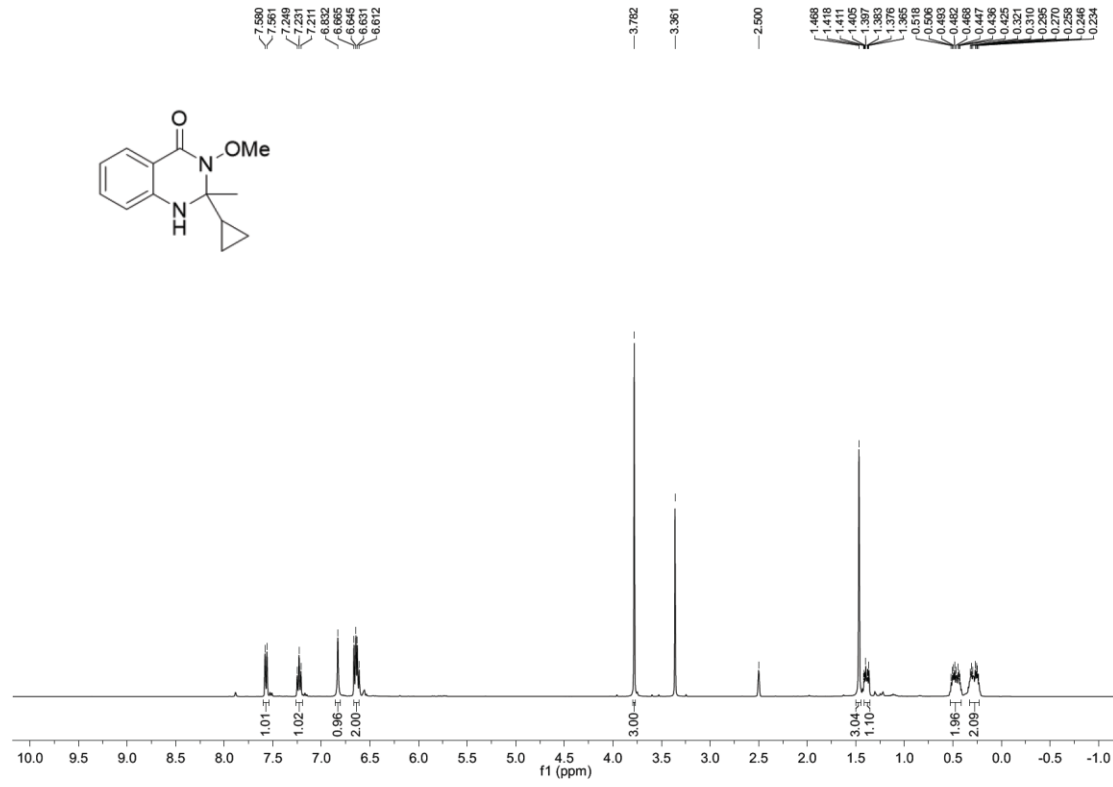

**3ae**-<sup>13</sup>C NMR (100 MHz, DMSO-*d*<sub>6</sub>)

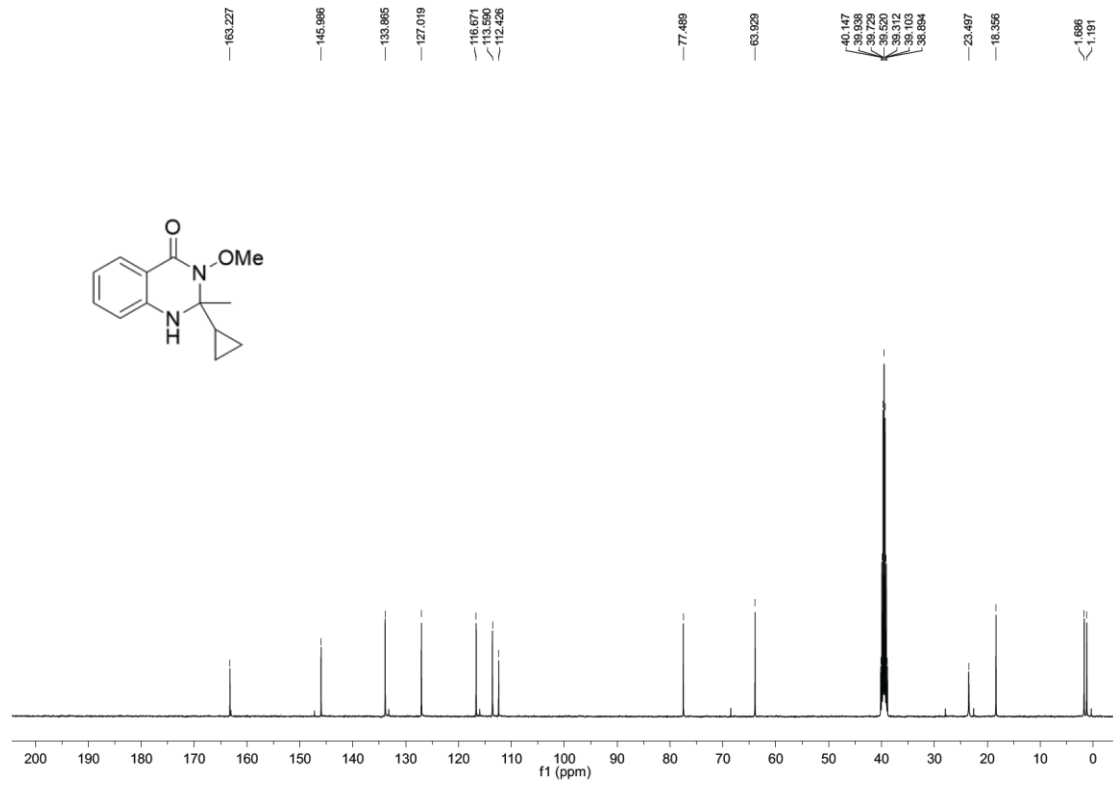

**3af-<sup>1</sup>H NMR (400 MHz, DMSO-*d*<sub>6</sub>)**

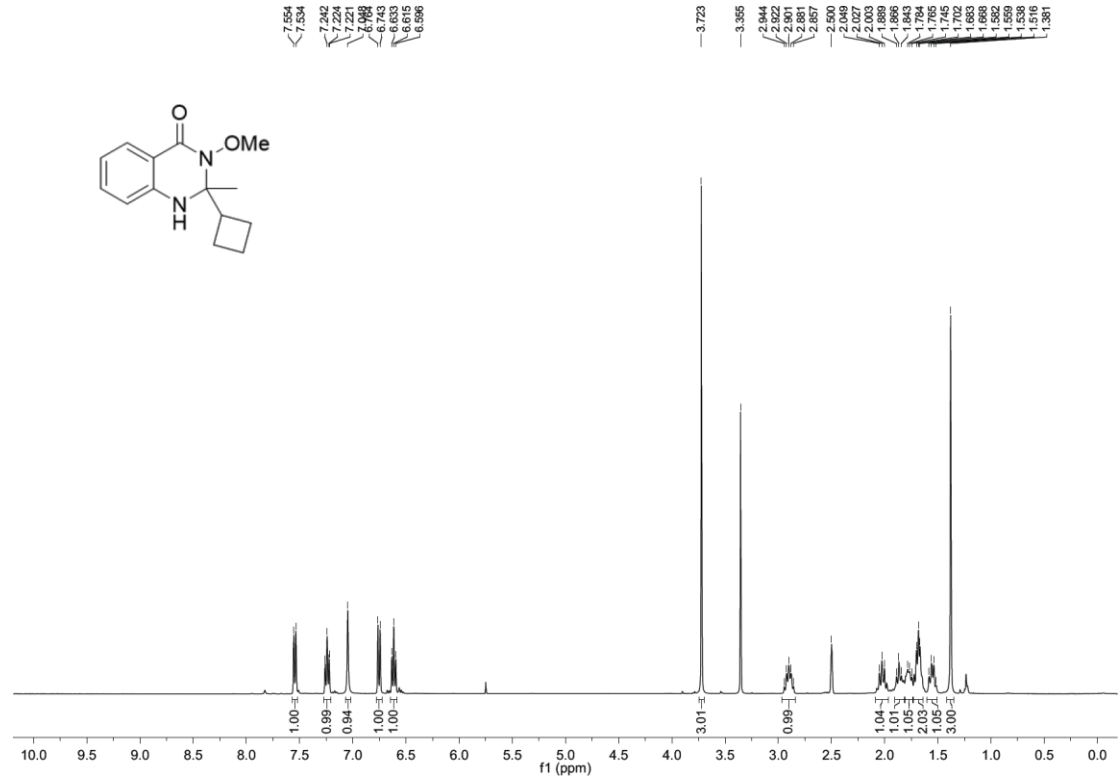

**3af-<sup>13</sup>C NMR (100 MHz, DMSO-*d*<sub>6</sub>)**

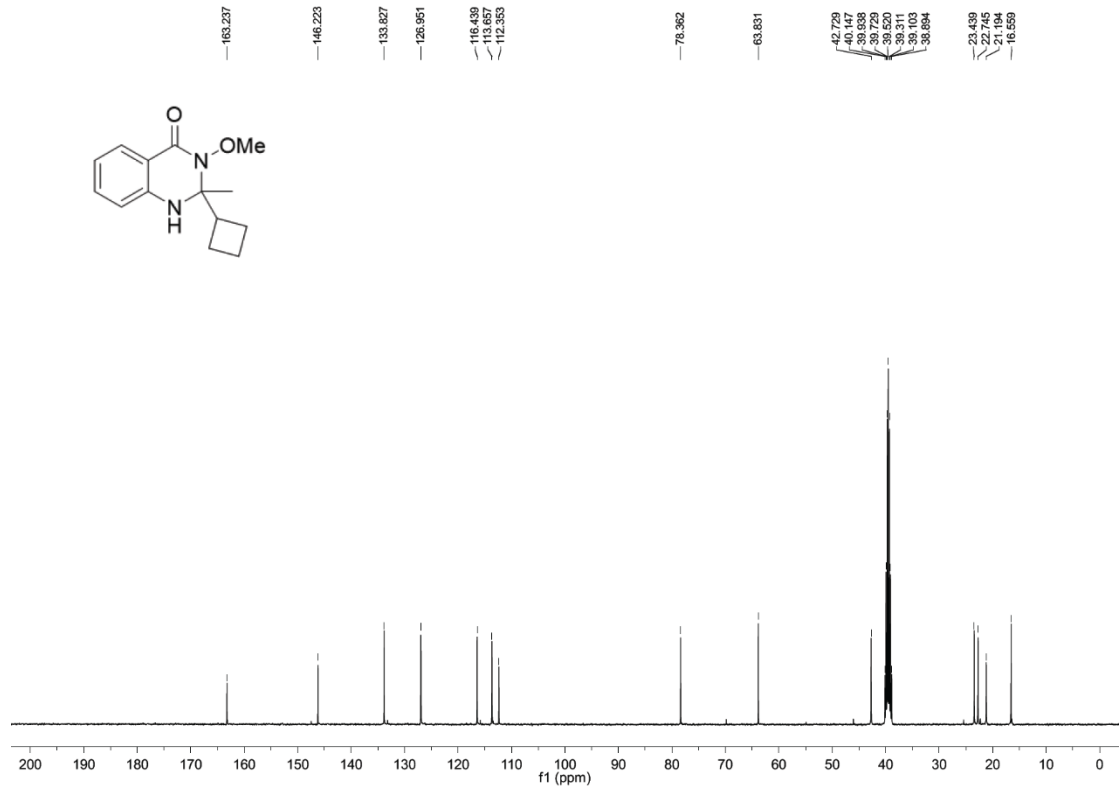

**3ag-<sup>1</sup>H NMR (400 MHz, DMSO-*d*<sub>6</sub>)**

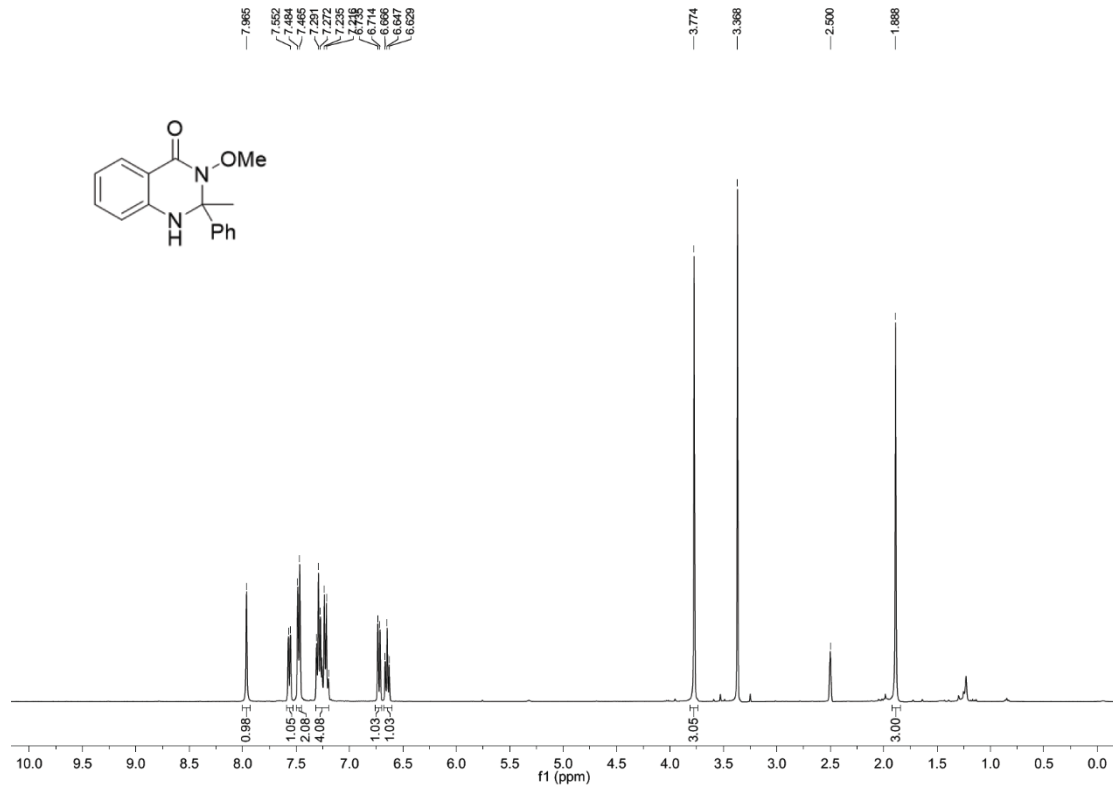

**3ag-<sup>13</sup>C NMR (100 MHz, DMSO-*d*<sub>6</sub>)**

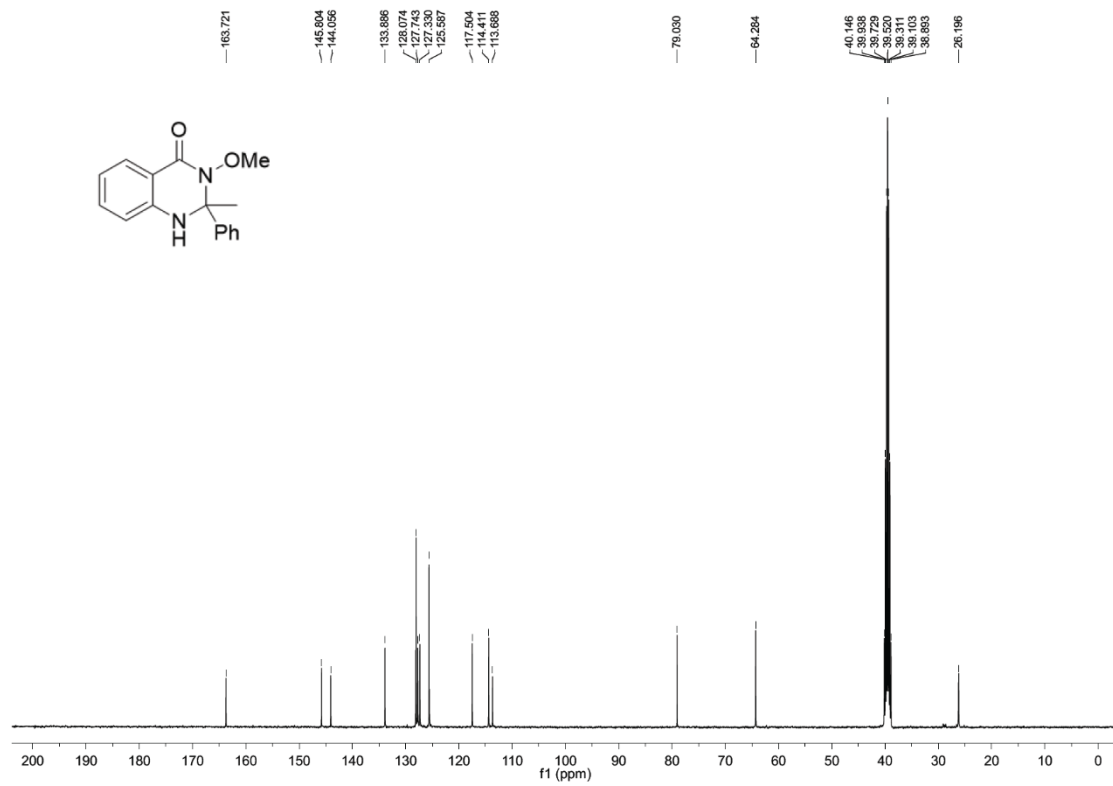

5-<sup>1</sup>H NMR (400 MHz, DMSO-d<sub>6</sub>)

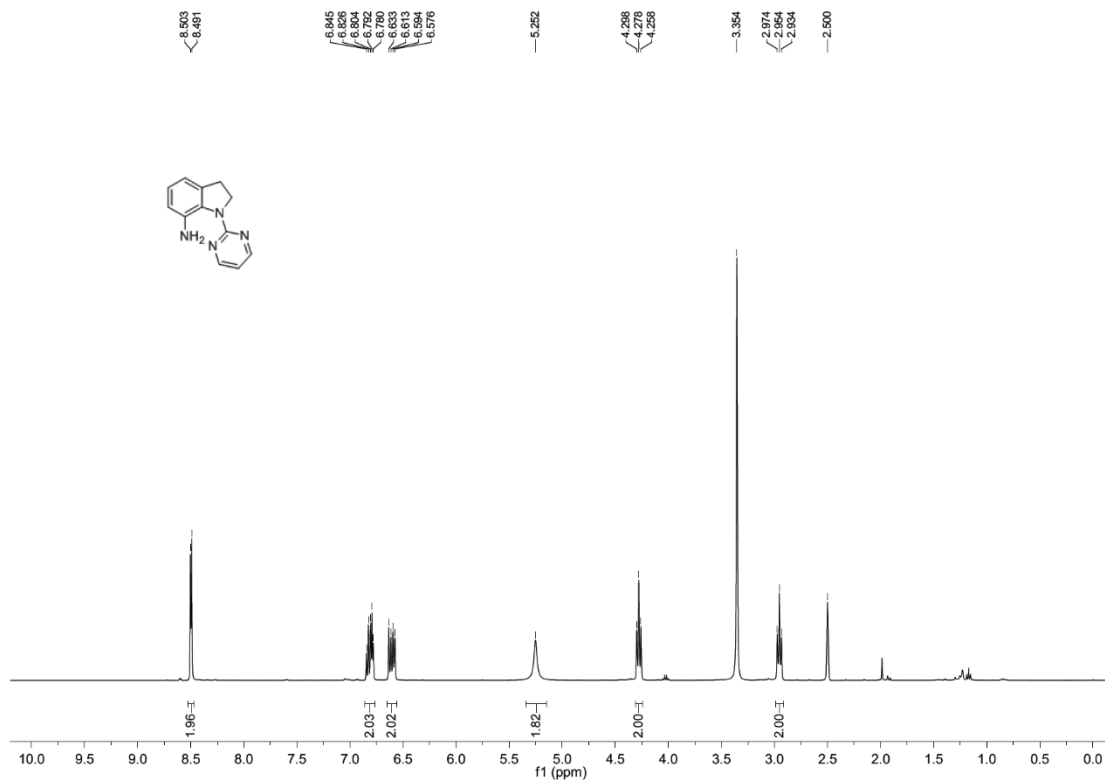

5-<sup>13</sup>C NMR (100 MHz, DMSO-d<sub>6</sub>)

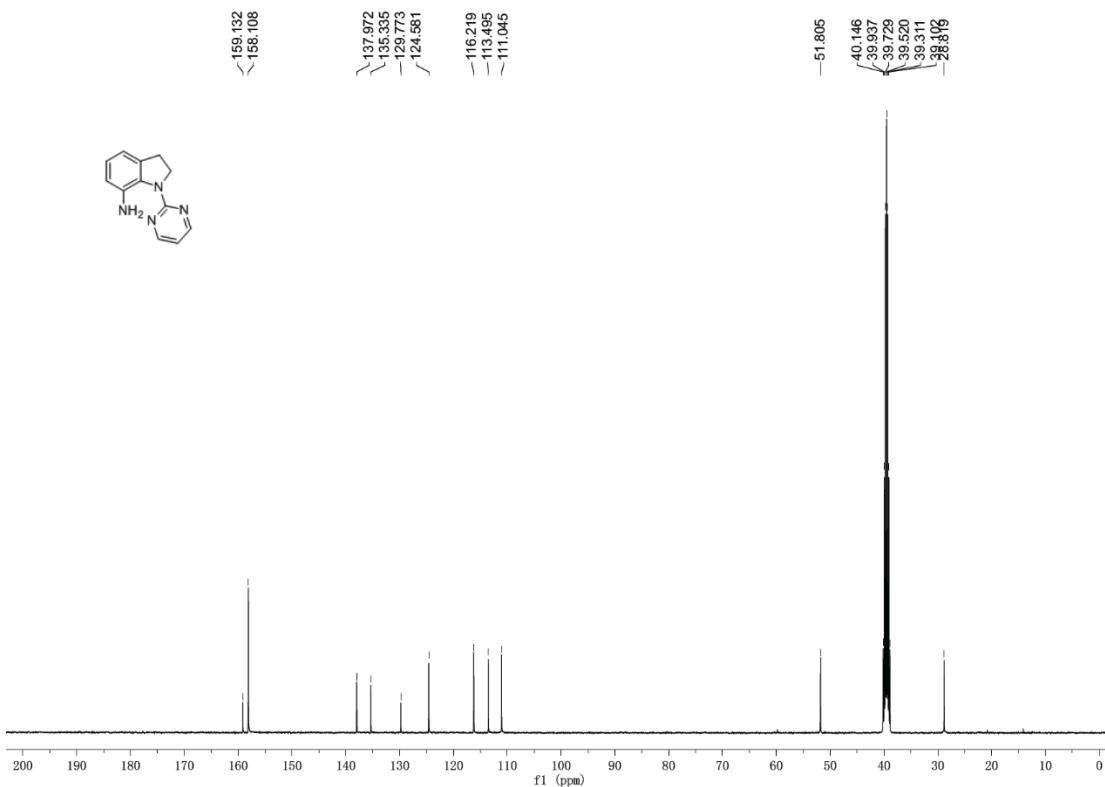

Supplement: d1qo01935j1.pdf [file d1qo01935j1.pdf]
